# Supplementary material for: C–H⋯π interactions as modulators of carbocation structure – implications for terpene biosynthesis
Source: Royal Society of Chemistry journal article supplement (doi:10.1039/c3sc50571e), 2013-01-01
Supplement: c3sc50571e.pdf [file c3sc50571e.pdf]

Supporting Information for

**C–H••• $\pi$  Interactions as Modulators of Carbocation Structure—Implications for Terpene  
Biosynthesis**

Young J. Hong and Dean J. Tantillo\*

*Department of Chemistry  
University of California, Davis  
One Shields Avenue  
Davis, CA 95616*

*tantillo@chem.ucdavis.edu*

**Table of Contents**

|                                                                                                             |           |
|-------------------------------------------------------------------------------------------------------------|-----------|
| Gaussian References                                                                                         | S2        |
| Table S1. Solvation binding energies                                                                        | S3        |
| Table S2. 2-Norbornyl cation-benzene complex (2)                                                            | S3        |
| Table S3. Single point energies at varied level of theories                                                 | S3        |
| Figure S1. Geometries of a carbocation relevant to diterpene biosynthesis<br>and its complexes with benzene | S3– S5    |
| Binding Energy Decomposition                                                                                | S5 – S6   |
| Coordinates and Energies                                                                                    | S6 – S93  |
| NBO analysis                                                                                                | S94 – S95 |

## Gaussian References

### Gaussian 03 Full Reference:

*GAUSSIAN03*, Revision D.01

M. J. Frisch, G. W. Trucks, H. B. Schlegel, G. E. Scuseria, M. A. Robb, J. R. Cheeseman, J. A. Montgomery, Jr., T. Vreven, K. N. Kudin, J. C. Burant, J. M. Millam, S. S. Iyengar, J. Tomasi, V. Barone, B. Mennucci, M. Cossi, G. Scalmani, N. Rega, G. A. Petersson, H. Nakatsuji, M. Hada, M. Ehara, K. Toyota, R. Fukuda, J. Hasegawa, M. Ishida, T. Nakajima, Y. Honda, O. Kitao, H. Nakai, M. Klene, X. Li, J. E. Knox, H. P. Hratchian, J. B. Cross, V. Bakken, C. Adamo, J. Jaramillo, R. Gomperts, R. E. Stratmann, O. Yazyev, A. J. Austin, R. Cammi, C. Pomelli, J. W. Ochterski, P. Y. Ayala, K. Morokuma, G. A. Voth, P. Salvador, J. J. Dannenberg, V. G. Zakrzewski, S. Dapprich, A. D. Daniels, M. C. Strain, O. Farkas, D. K. Malick, A. D. Rabuck, K. Raghavachari, J. B. Foresman, J. V. Ortiz, Q. Cui, A. G. Baboul, S. Clifford, J. Cioslowski, B. B. Stefanov, G. Liu, A. Liashenko, P. Piskorz, I. Komaromi, R. L. Martin, D. J. Fox, T. Keith, M. A. Al-Laham, C. Y. Peng, A. Nanayakkara, M. Challacombe, P. M. W. Gill, B. Johnson, W. Chen, M. W. Wong, C. Gonzalez, and J. A. Pople, Gaussian, Inc., Wallingford CT, 2004.

### Gaussian 09 Full reference:

Gaussian 09, Revision B.01,

M. J. Frisch, G. W. Trucks, H. B. Schlegel, G. E. Scuseria, M. A. Robb, J. R. Cheeseman, G. Scalmani, V. Barone, B. Mennucci, G. A. Petersson, H. Nakatsuji, M. Caricato, X. Li, H. P. Hratchian, A. F. Izmaylov, J. Bloino, G. Zheng, J. L. Sonnenberg, M. Hada, M. Ehara, K. Toyota, R. Fukuda, J. Hasegawa, M. Ishida, T. Nakajima, Y. Honda, O. Kitao, H. Nakai, T. Vreven, J. A. Montgomery, Jr., J. E. Peralta, F. Ogliaro, M. Bearpark, J. J. Heyd, E. Brothers, K. N. Kudin, V. N. Staroverov, T. Keith, R. Kobayashi, J. Normand, K. Raghavachari, A. Rendell, J. C. Burant, S. S. Iyengar, J. Tomasi, M. Cossi, N. Rega, J. M. Millam, M. Klene, J. E. Knox, J. B. Cross, V. Bakken, C. Adamo, J. Jaramillo, R. Gomperts, R. E. Stratmann, O. Yazyev, A. J. Austin, R. Cammi, C. Pomelli, J. W. Ochterski, R. L. Martin, K. Morokuma, V. G. Zakrzewski, G. A. Voth, P. Salvador, J. J. Dannenberg, S. Dapprich, A. D. Daniels, O. Farkas, J. B. Foresman, J. V. Ortiz, J. Cioslowski, and D. J. Fox, Gaussian, Inc., Wallingford CT, 2010.

**Table S1.** Gas-phase and solvation binding energies of the 2-norbornyl cation and benzene complex in Table 1 (**1**) at various levels of theory.

| Method                        | gas-phase       |                 | DCM <sup>e</sup> |                 | H <sub>2</sub> O <sup>e</sup> |                 |
|-------------------------------|-----------------|-----------------|------------------|-----------------|-------------------------------|-----------------|
|                               | BE <sup>a</sup> | BE <sup>b</sup> | BE <sup>a</sup>  | BE <sup>b</sup> | BE <sup>a</sup>               | BE <sup>b</sup> |
| B3LYP <sup>c</sup>            | -6.39           | -8.64           | +1.32            | -4.24           | -0.04                         | -6.06           |
| CAM-B3LYP <sup>d</sup>        | -6.78           | -8.54           | +0.29            | -5.12           | -1.28                         | -7.07           |
| LC- $\omega$ PBE <sup>d</sup> | -6.29           | -6.71           | -4.07            | -4.70           | -6.00                         | -6.62           |
| $\omega$ B97XD <sup>d</sup>   | -12.1           | -14.57          | -3.18            | -9.16           | -4.54                         | -10.92          |
| PBE1 <sup>c</sup>             | -7.58           | -10.24          | +1.50            | -4.95           | +0.23                         | -6.66           |
| B971 <sup>c</sup>             | -8.25           | -10.93          | +0.08            | -6.10           | -1.47                         | -8.06           |

<sup>a</sup> Binding energy of complex versus separate fully optimized benzene and 2-norbornyl cation.

<sup>b</sup> Binding energy of complex versus separate fully optimized benzene and 2-norbornyl cation with the geometry found in the complex.

<sup>c</sup> Gas-phase calculations were carried out with GAUSSIAN03.

<sup>d</sup> Gas-phase calculations were carried out with GAUSSIAN09.

<sup>e</sup> Single point solvation calculations with GAUSSIAN09 on the optimized geometries in gas phase were carried out using CPCM method with UAKS radii and energies include SMD corrections.

**Table S2.** Fully optimized structures of benzene-complexed 2-norbornyl cation (complex **2**) at various levels of theory. Distances shown are in Å and energies are in kcal/mol. BE<sup>a</sup> = binding energy of complex versus separate fully optimized benzene and 2-norbornyl cation. BE<sup>b</sup> = binding energy of complex versus separate fully optimized benzene and 2-norbornyl cation with the geometry found in the complex. BSSE = basis set superposition error.

|                                           | B3LYP           | CAM-B3LYP | LC- $\omega$ PBE | $\omega$ B97XD |          |
|-------------------------------------------|-----------------|-----------|------------------|----------------|----------|
| norbornyl cation•benzene complex <b>2</b> |                 |           |                  |                |          |
|                                           | BE <sup>a</sup> | -6.65     | -7.84            | -8.17          | -12.45   |
|                                           | BE <sup>b</sup> | [-6.74]   | [-7.96]          | [-8.37]        | [-12.58] |
|                                           | BSSE            | (+0.41)   | (+0.43)          | (+0.40)        | (+0.44)  |
|                                           | PBE1            | B971      | M06-2X           |                |          |
| norbornyl cation•benzene complex <b>2</b> |                 |           |                  |                |          |
|                                           | BE <sup>a</sup> | -8.58     | -8.55            | -11.63         |          |
|                                           | BE <sup>b</sup> | [-8.74]   | [-8.62]          | [-11.71]       |          |
|                                           | BSSE            | (+0.45)   | (+0.43)          | (+0.46)        |          |

**Table S3.** Gas-phase binding energies of the 2-norbornyl cation and benzene complex (geometries optimized using B3LYP/6-31+G(d,p)) at various levels of theory. BE<sup>a</sup> = binding energy of complex versus separate fully optimized benzene and 2-norbornyl cation. BE<sup>b</sup> = binding energy of complex versus separate fully optimized benzene and 2-norbornyl cation with the geometry found in the complex. BSSE = basis set superposition error.

|   |                 | B2PLYPD  | CAM-B3LYP | LC- $\omega$ PBE | $\omega$ B97XD | PBE1     | B971     | M06-2X   | CCSD(T) <sup>c</sup> |
|---|-----------------|----------|-----------|------------------|----------------|----------|----------|----------|----------------------|
| 1 | BE <sup>a</sup> | -9.60    | -6.77     | -4.67            | -11.80         | -7.46    | -8.88    | -9.64    | -10.97               |
|   | BE <sup>b</sup> | [-11.77] | [-9.69]   | [-9.78]          | [-15.32]       | [-11.29] | [-11.29] | [-14.46] | [-14.29]             |
|   | BSSE            | (+1.51)  | (+0.49)   | (+0.44)          | (+0.47)        | (+0.51)  | (+0.51)  | (+0.44)  | (+3.29)              |
| 2 | BE <sup>a</sup> | -9.95    | -8.09     | -7.28            | -11.56         | -8.22    | -8.96    | -10.20   | -11.03               |
|   | BE <sup>b</sup> | [-9.94]  | [-8.36]   | [-8.59]          | [-11.98]       | [-8.83]  | [-8.70]  | [-10.73] | [-10.98]             |
|   | BSSE            | (+1.21)  | (+0.40)   | (+0.36)          | (+0.37)        | (+0.40)  | (+0.40)  | (+0.34)  | (+2.13)              |

CAM-B3LYP

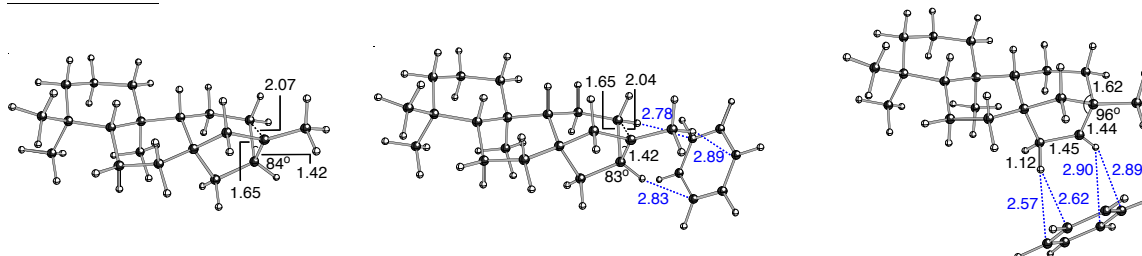

LC- $\omega$ PBE

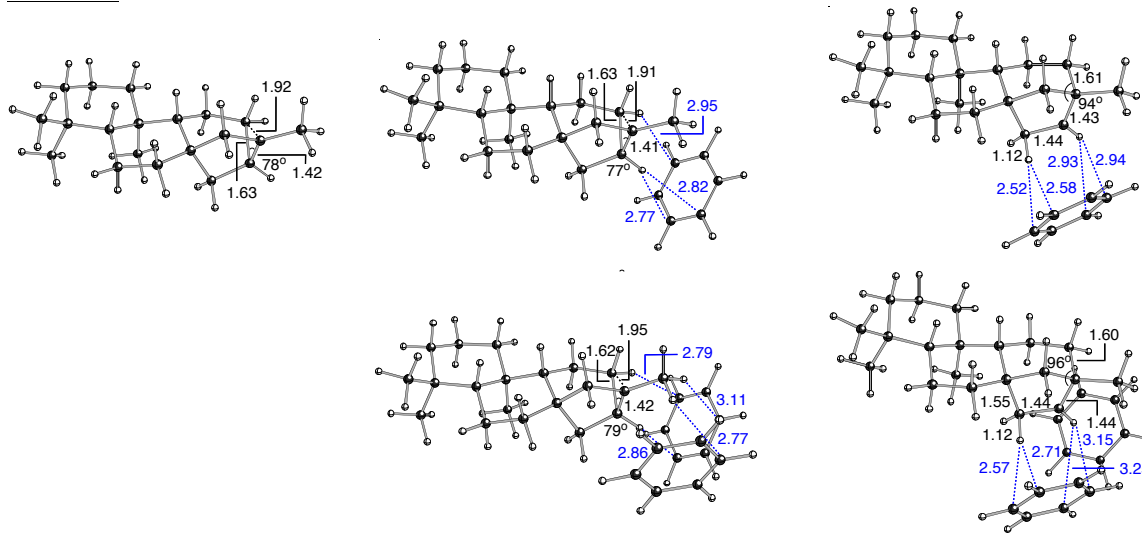

$\omega$ B97X-D

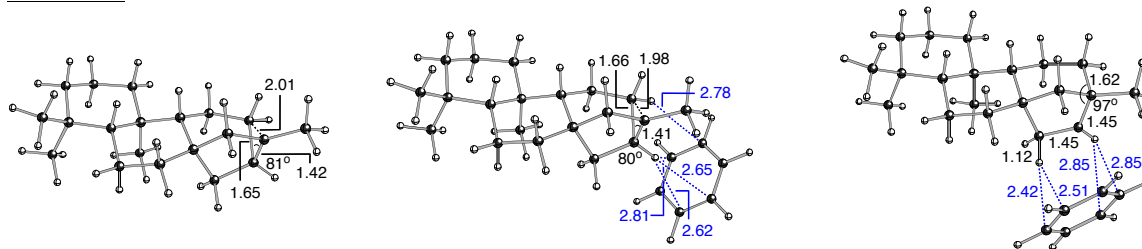

PBE1

S5

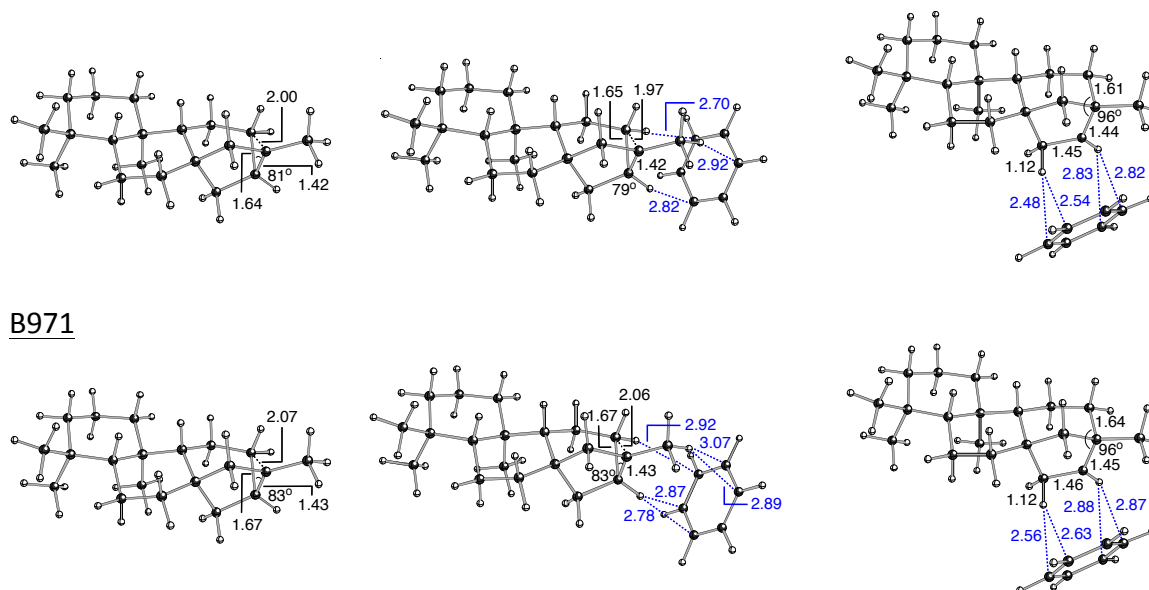

B971

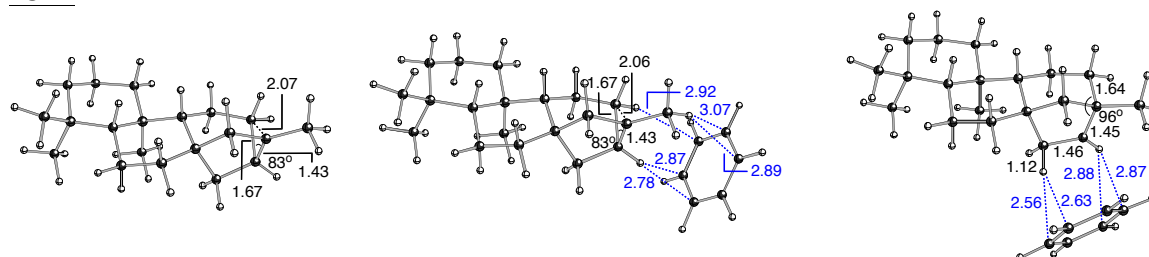

**Figure S1.** Fully optimized geometries of a carbocation involved in beyerene/kaurene/trachylobane/atiserene biosynthesis, complexes of this carbocation with one/two benzene molecule(s). Selected distances are shown in Å.

**Binding Energy Decomposition for the 2-norbornyl cation-benzene complex** (Table 1; B3LYP/TZ2P (kcal/mol), ADF program)

Pauli Repulsion

| Type of energy                     | hartrees           | eV            | kcal/mol      | kJ/mol       |
|------------------------------------|--------------------|---------------|---------------|--------------|
| Kinetic ( $\Delta T^0$ )           | 0.102570086        | 2.7911        | <b>64.36</b>  | 269.3        |
| $\Delta V^{\text{Pauli}}$ Coulomb  | -0.060962533       | -1.6589       | <b>-38.25</b> | -160.06      |
| $\Delta V^{\text{Pauli}}$ Hybrid-X | -0.019248126       | -0.5238       | <b>-12.08</b> | -50.54       |
| $\Delta V^{\text{Pauli}}$ Hybrid-C | -0.006880599       | -0.1872       | <b>-4.32</b>  | -18.07       |
| <b>Total Pauli Repulsion</b>       | <b>0.015478827</b> | <b>0.4212</b> | <b>9.71</b>   | <b>40.64</b> |

Steric Interaction

| Type of energy                                | hartrees           | eV            | kcal/mol    | kJ/mol      |
|-----------------------------------------------|--------------------|---------------|-------------|-------------|
| Pauli Repulsion ( $\Delta E^{\text{Pauli}}$ ) | 0.015478827204     | 0.4212        | <b>9.71</b> | 40.64       |
| Electrostatic Interaction                     | -0.013224846       | -0.3599       | <b>-8.3</b> | -34.72      |
| <b>Total Steric Interaction</b>               | <b>0.002253981</b> | <b>0.0613</b> | <b>1.41</b> | <b>5.92</b> |

Orbital Interactions

| Type of energy                    | hartrees            | eV             | kcal/mol      | kJ/mol        |
|-----------------------------------|---------------------|----------------|---------------|---------------|
| A                                 | -0.018123107        | -0.4932        | <b>-11.37</b> | -47.58        |
| (Hybrid part) HF exchange         | 0.002143704         | 0.0583         | <b>1.35</b>   | 5.63          |
| <b>Total Orbital Interactions</b> | <b>-0.015979403</b> | <b>-0.4348</b> | <b>-10.03</b> | <b>-41.95</b> |

Alternative Decomposition Orb.Int

| Type of energy                    | hartrees            | eV             | kcal/mol      | kJ/mol        |
|-----------------------------------|---------------------|----------------|---------------|---------------|
| Kinetic                           | -0.0607176          | -1.6522        | <b>-38.1</b>  | -159.41       |
| Coulomb                           | 0.035559324         | 0.9676         | <b>22.31</b>  | 93.36         |
| XC                                | 0.009178874         | 0.2498         | <b>5.76</b>   | 24.1          |
| <b>Total Orbital Interactions</b> | <b>-0.015979403</b> | <b>-0.4348</b> | <b>-10.03</b> | <b>-41.95</b> |
| Residu (E=Steric+OrbInt+Res)      | 5.9576E-09          | 0              | <b>0</b>      | 0             |
| <b>Total Bonding Energy:</b>      | <b>-0.013725416</b> | <b>-0.3735</b> | <b>-8.61</b>  | <b>-36.04</b> |

Summary of Bonding Energy (energy terms are taken from the energy decomposition above)

| Type of energy                 | hartrees            | eV             | kcal/mol      | kJ/mol        |
|--------------------------------|---------------------|----------------|---------------|---------------|
| Electrostatic Energy           | -0.013224846        | -0.3599        | <b>-8.3</b>   | -34.72        |
| Kinetic Energy                 | 0.041852486         | 1.1389         | <b>26.26</b>  | 109.88        |
| Coulomb (Steric+OrbInt) Energy | -0.025403204        | -0.6913        | <b>-15.94</b> | -66.7         |
| XC Energy                      | -0.016949852        | -0.4612        | <b>-10.64</b> | -44.5         |
| <b>Total Bonding Energy</b>    | <b>-0.013725416</b> | <b>-0.3735</b> | <b>-8.61</b>  | <b>-36.04</b> |

## Coordinates and Energies

**Table 1**

2-Norbornyl cation and benzene complex (**1**)

### B3LYP

Benzene

B3LYP/6-31+G(d,p)//B3LYP/6-31+G(d,p):

HF = -232.268418 hartrees (-145750.75497918 kcal/mol)

Imaginary Frequencies: none found

Zero-point correction = 0.100451 (Hartree/Particle)

Coordinates (from last standard orientation):

| Center Number | Atomic Number | Coordinates (Angstroms) |           |           |
|---------------|---------------|-------------------------|-----------|-----------|
|               |               | X                       | Y         | Z         |
| 1             | 6             | 1.004642                | -0.972726 | -0.000003 |
| 2             | 6             | -0.340224               | -1.356277 | -0.000072 |

|    |   |           |           |           |
|----|---|-----------|-----------|-----------|
| 3  | 6 | -1.344778 | -0.383660 | 0.000061  |
| 4  | 6 | -1.004560 | 0.972811  | -0.000008 |
| 5  | 6 | 0.340111  | 1.356303  | -0.000064 |
| 6  | 6 | 1.344810  | 0.383551  | 0.000060  |
| 7  | 1 | 1.784826  | -1.728466 | 0.000064  |
| 8  | 1 | -0.604294 | -2.409911 | -0.000080 |
| 9  | 1 | -2.389324 | -0.681549 | 0.000140  |
| 10 | 1 | -1.784931 | 1.728349  | -0.000011 |
| 11 | 1 | 0.604426  | 2.409869  | -0.000013 |
| 12 | 1 | 2.389290  | 0.681697  | 0.000052  |

---

Free 2-norbornyl cation

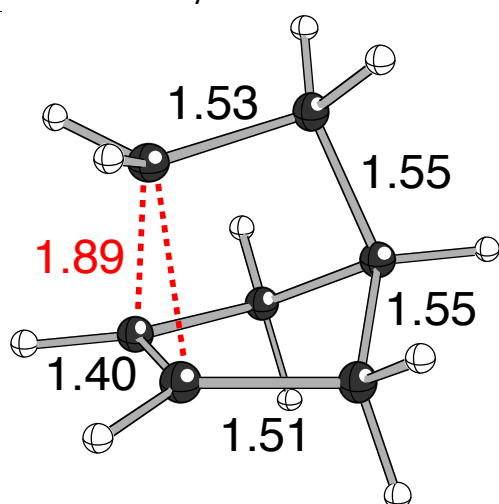

B3LYP/6-31+G(d,p)//B3LYP/6-31+G(d,p):

HF = -273.0836446 hartrees (-171362.717822946 kcal/mol)

Imaginary Frequencies: none found

Zero-point correction = 0.163723 (Hartree/Particle)

Coordinates (from last standard orientation):

---

| Center Number | Atomic Number | Coordinates (Angstroms) |           |           |
|---------------|---------------|-------------------------|-----------|-----------|
|               |               | X                       | Y         | Z         |
| 1             | 6             | -0.401828               | 1.378716  | -0.000012 |
| 2             | 6             | 1.062967                | 0.409126  | -0.697655 |
| 3             | 6             | -0.653168               | -0.992003 | 0.000005  |
| 4             | 6             | -1.491208               | 0.307448  | -0.000012 |
| 5             | 1             | -0.328703               | 2.031131  | 0.873959  |
| 6             | 1             | -0.328688               | 2.031111  | -0.873999 |
| 7             | 1             | -2.124178               | 0.387654  | 0.886692  |

|    |   |           |           |           |
|----|---|-----------|-----------|-----------|
| 8  | 1 | -2.124169 | 0.387642  | -0.886723 |
| 9  | 6 | 0.304191  | -0.797945 | -1.200118 |
| 10 | 1 | 1.012120  | -1.631081 | -1.306797 |
| 11 | 1 | -0.189535 | -0.641288 | -2.161801 |
| 12 | 6 | 1.062955  | 0.409141  | 0.697659  |
| 13 | 6 | 0.304175  | -0.797923 | 1.200135  |
| 14 | 1 | 1.012105  | -1.631056 | 1.306839  |
| 15 | 1 | -0.189563 | -0.641247 | 2.161808  |
| 16 | 1 | 1.678808  | 1.063301  | -1.306972 |
| 17 | 1 | 1.678791  | 1.063326  | 1.306972  |
| 18 | 1 | -1.225495 | -1.918858 | 0.000008  |

---

### 2-Norbornyl cation-benzene complex

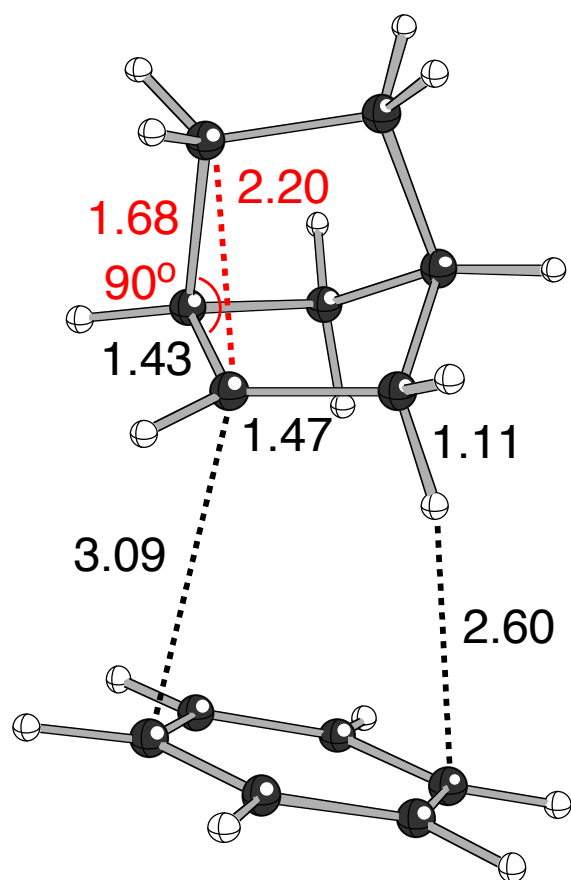

B3LYP/6-31+G(d,p)//B3LYP/6-31+G(d,p):

HF = -505.3622521 hartrees (-317119.866815271 kcal/mol)

Imaginary Frequencies: none found

Zero-point correction = 0.265031 (Hartree/Particle)

Counterpoise: BSSE energy = 0.000767508064



Coordinates (from last standard orientation):

---

| Center<br>Number | Atomic<br>Number | Coordinates (Angstroms) |           |           |
|------------------|------------------|-------------------------|-----------|-----------|
|                  |                  | X                       | Y         | Z         |
| 1                | 6                | -1.780094               | -0.523997 | 1.280552  |
| 2                | 6                | -1.963116               | -1.220754 | -0.083468 |
| 3                | 6                | -0.820868               | 0.799065  | -0.435261 |
| 4                | 6                | -1.663685               | 0.903981  | 0.715780  |
| 5                | 1                | -2.635449               | -0.642246 | 1.949570  |
| 6                | 1                | -0.868847               | -0.821673 | 1.806988  |
| 7                | 1                | -1.614732               | 1.783648  | 1.352172  |
| 8                | 6                | -0.790166               | -0.598220 | -0.895523 |
| 9                | 1                | -0.806128               | -0.718073 | -1.982889 |
| 10               | 6                | -3.248941               | -0.549510 | -0.620059 |
| 11               | 1                | -3.397876               | -0.714401 | -1.689797 |
| 12               | 1                | -4.128380               | -0.930041 | -0.093750 |
| 13               | 6                | -3.009233               | 0.934508  | -0.284017 |
| 14               | 1                | -2.915315               | 1.591387  | -1.153751 |
| 15               | 1                | -3.747470               | 1.393528  | 0.380420  |
| 16               | 1                | -1.969311               | -2.310486 | -0.077261 |
| 17               | 1                | -0.419378               | 1.647343  | -0.980657 |
| 18               | 1                | 0.176819                | -1.015562 | -0.543690 |
| 19               | 6                | 2.002369                | 0.759774  | 1.204278  |
| 20               | 6                | 2.252611                | -0.613523 | 1.292372  |
| 21               | 6                | 2.175225                | 1.427095  | -0.019674 |
| 22               | 6                | 2.665087                | -1.320933 | 0.157013  |
| 23               | 1                | 2.151159                | -1.126245 | 2.244407  |
| 24               | 6                | 2.602805                | 0.719711  | -1.152536 |
| 25               | 1                | 2.034519                | 2.503613  | -0.073083 |
| 26               | 6                | 2.842671                | -0.653398 | -1.064782 |
| 27               | 1                | 2.878029                | -2.383528 | 0.228015  |
| 28               | 1                | 2.769748                | 1.242802  | -2.089624 |
| 29               | 1                | 3.188622                | -1.202157 | -1.935547 |
| 30               | 1                | 1.716004                | 1.319296  | 2.090446  |

---

2-Norbornyl cation in the complex

B3LYP/6-31+G(d,p)//B3LYP/6-31+G(d,p):

HF = -273.0800614 hartrees (-171360.469329114 kcal/mol)

CAM-B3LYP

Benzene

CAM-B3LYP/6-31+G(d,p)//CAM-B3LYP/6-31+G(d,p):

HF = -232.1238481 hartrees (-145660.035921231 kcal/mol)

Imaginary Frequencies: none found

Zero-point correction = 0.101598 (Hartree/Particle)

Coordinates (from last standard orientation):

| Center Number | Atomic Number | Coordinates (Angstroms) |           |           |
|---------------|---------------|-------------------------|-----------|-----------|
|               |               | X                       | Y         | Z         |
| 1             | 6             | -1.370839               | -0.245827 | -0.000002 |
| 2             | 6             | -0.898286               | 1.064244  | -0.000038 |
| 3             | 6             | 0.472509                | 1.310032  | 0.000035  |
| 4             | 6             | 1.370845                | 0.245797  | -0.000004 |
| 5             | 6             | 0.898309                | -1.064224 | -0.000037 |
| 6             | 6             | -0.472538               | -1.310022 | 0.000031  |
| 7             | 1             | -2.439387               | -0.437447 | 0.000028  |
| 8             | 1             | -1.598518               | 1.893816  | -0.000035 |
| 9             | 1             | 0.840861                | 2.331228  | 0.000078  |
| 10            | 1             | 2.439378                | 0.437496  | 0.000001  |
| 11            | 1             | 1.598481                | -1.893847 | -0.000019 |
| 12            | 1             | -0.840815               | -2.331245 | 0.000037  |

Free 2-norbornyl cation

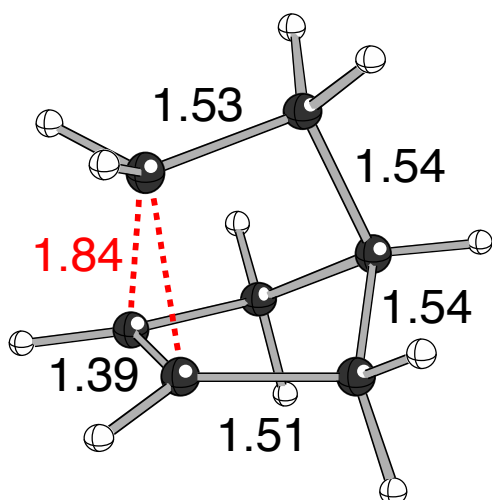

CAM-B3LYP/6-31+G(d,p)//CAM-B3LYP/6-31+G(d,p):

HF = -272.913983 hartrees (-171256.25347233 kcal/mol)

Imaginary Frequencies: none found

Zero-point correction = 0.165747 (Hartree/Particle)

Coordinates (from last standard orientation):

| Center<br>Number | Atomic<br>Number | Coordinates (Angstroms) |           |           |
|------------------|------------------|-------------------------|-----------|-----------|
|                  |                  | X                       | Y         | Z         |
| 1                | 6                | -0.019399               | 1.410791  | -0.000015 |
| 2                | 6                | 1.118152                | 0.136297  | -0.695184 |
| 3                | 6                | -0.882045               | -0.792377 | 0.000005  |
| 4                | 6                | -1.353770               | 0.671165  | -0.000015 |
| 5                | 1                | 0.209684                | 2.033926  | 0.867673  |
| 6                | 1                | 0.209704                | 2.033943  | -0.867683 |
| 7                | 1                | -1.942558               | 0.915630  | 0.885627  |
| 8                | 1                | -1.942545               | 0.915598  | -0.885675 |
| 9                | 6                | 0.087761                | -0.845805 | -1.194650 |
| 10               | 1                | 0.568677                | -1.825727 | -1.301061 |
| 11               | 1                | -0.353797               | -0.570874 | -2.154054 |
| 12               | 6                | 1.118147                | 0.136311  | 0.695187  |
| 13               | 6                | 0.087747                | -0.845777 | 1.194668  |
| 14               | 1                | 0.568656                | -1.825696 | 1.301122  |
| 15               | 1                | -0.353823               | -0.570811 | 2.154059  |
| 16               | 1                | 1.883833                | 0.606165  | -1.303361 |
| 17               | 1                | 1.883821                | 0.606192  | 1.303363  |
| 18               | 1                | -1.671219               | -1.541977 | 0.000009  |

2-Norbornyl cation-benzene complex

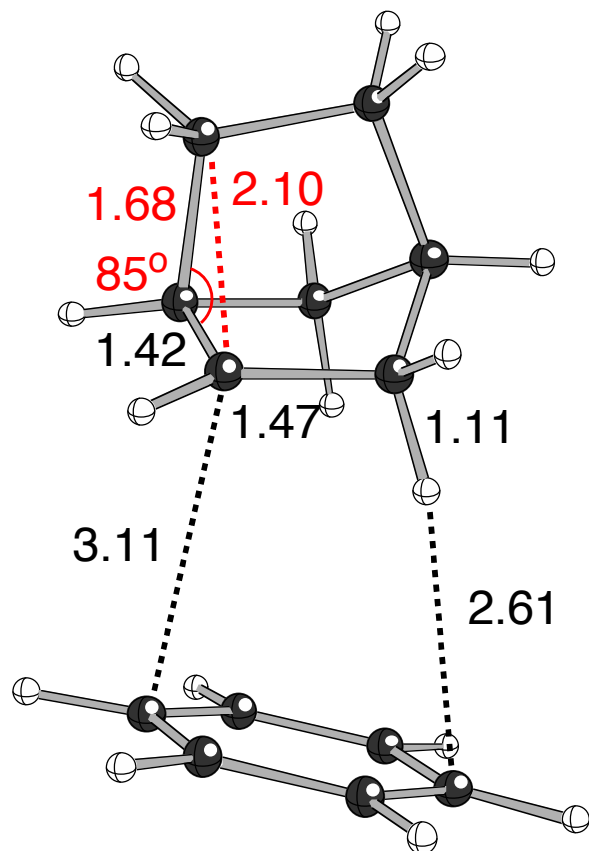

CAM-B3LYP/6-31+G(d,p)//CAM-B3LYP/6-31+G(d,p):  
HF = -505.0486389 hartrees (-316923.071396139 kcal/mol)  
Imaginary Frequencies: none found  
Zero-point correction = 0.268185 (Hartree/Particle)  
Counterpoise: BSSE energy = 0.0007237355

Coordinates (from last standard orientation):

| Center Number | Atomic Number | Coordinates (Angstroms) |           |           |
|---------------|---------------|-------------------------|-----------|-----------|
|               |               | X                       | Y         | Z         |
| 1             | 6             | -1.786312               | -0.596841 | 1.255419  |
| 2             | 6             | -1.965609               | -1.211459 | -0.140757 |
| 3             | 6             | -0.855442               | 0.825247  | -0.382841 |
| 4             | 6             | -1.655236               | 0.853288  | 0.785574  |
| 5             | 1             | -2.642596               | -0.752133 | 1.913916  |
| 6             | 1             | -0.876878               | -0.925974 | 1.764782  |
| 7             | 1             | -1.619831               | 1.697714  | 1.466721  |
| 8             | 6             | -0.803321               | -0.546743 | -0.914191 |
| 9             | 1             | -0.826704               | -0.612309 | -2.004338 |
| 10            | 6             | -3.238864               | -0.506028 | -0.638244 |
| 11            | 1             | -3.407534               | -0.638305 | -1.708449 |

|    |   |           |           |           |
|----|---|-----------|-----------|-----------|
| 12 | 1 | -4.119349 | -0.873424 | -0.107390 |
| 13 | 6 | -2.949944 | 0.955067  | -0.273976 |
| 14 | 1 | -2.809381 | 1.615519  | -1.135557 |
| 15 | 1 | -3.682895 | 1.450466  | 0.366780  |
| 16 | 1 | -1.977981 | -2.298793 | -0.194597 |
| 17 | 1 | -0.445292 | 1.704689  | -0.868474 |
| 18 | 1 | 0.170782  | -0.952094 | -0.581343 |
| 19 | 6 | 2.051898  | 0.163696  | 1.410923  |
| 20 | 6 | 2.401724  | -1.080769 | 0.891629  |
| 21 | 6 | 2.065311  | 1.290698  | 0.587322  |
| 22 | 6 | 2.765984  | -1.199113 | -0.450294 |
| 23 | 1 | 2.415916  | -1.954483 | 1.535425  |
| 24 | 6 | 2.438601  | 1.172173  | -0.753875 |
| 25 | 1 | 1.839191  | 2.268490  | 1.003096  |
| 26 | 6 | 2.787304  | -0.072480 | -1.272110 |
| 27 | 1 | 3.058428  | -2.165389 | -0.848571 |
| 28 | 1 | 2.489328  | 2.055279  | -1.383911 |
| 29 | 1 | 3.096684  | -0.162590 | -2.308298 |
| 30 | 1 | 1.801552  | 0.262920  | 2.462732  |

-----  
2-Norbornyl cation in the complex

CAM-B3LYP/6-31+G(d,p)//CAM-B3LYP/6-31+G(d,p):

HF = -272.9111794 hartrees (-171254.494185294 kcal/mol)

LC- $\omega$ PBE

Benzene

LC- $\omega$ PBE/6-31+G(d,p)//LC- $\omega$ PBE/6-31+G(d,p):

HF = -232.0866898 hartrees (-145636.718716398 kcal/mol)

Zero-point correction = 0.102457 (Hartree/Particle)

Coordinates (from last standard orientation):

-----

| Center<br>Number | Atomic<br>Number | Coordinates (Angstroms) |           |           |
|------------------|------------------|-------------------------|-----------|-----------|
|                  |                  | X                       | Y         | Z         |
| 1                | 6                | -0.992177               | -0.972470 | -0.000003 |
| 2                | 6                | 0.346152                | -1.345451 | -0.000064 |
| 3                | 6                | 1.338338                | -0.372987 | 0.000043  |
| 4                | 6                | 0.992157                | 0.972489  | -0.000008 |
| 5                | 6                | -0.346125               | 1.345458  | -0.000048 |
| 6                | 6                | -1.338345               | 0.372960  | 0.000054  |
| 7                | 1                | -1.767844               | -1.732727 | 0.000049  |

-----

|    |   |           |           |           |
|----|---|-----------|-----------|-----------|
| 8  | 1 | 0.616599  | -2.397359 | -0.000061 |
| 9  | 1 | 2.384542  | -0.664621 | 0.000109  |
| 10 | 1 | 1.767864  | 1.732707  | 0.000002  |
| 11 | 1 | -0.616627 | 2.397353  | -0.000009 |
| 12 | 1 | -2.384534 | 0.664648  | 0.000068  |

---

Free 2-norbornyl cation

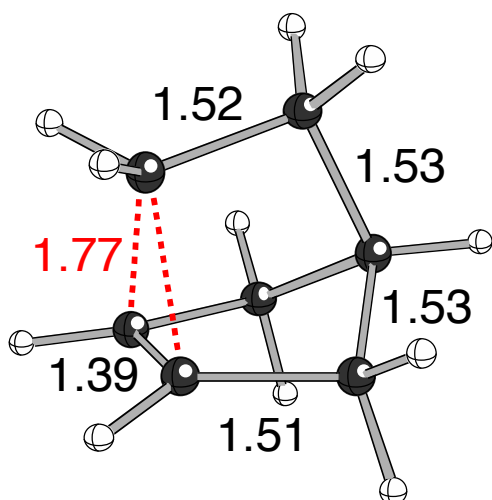

LC- $\omega$ PBE/6-31+G(d,p)//LC- $\omega$ PBE/6-31+G(d,p):

HF = -272.9127703 hartrees (-171255.492490953 kcal/mol)

Imaginary Frequencies: none found

Zero-point correction = 0.167569 (Hartree/Particle)

Coordinates (from last standard orientation):

---

| Center Number | Atomic Number | Coordinates (Angstroms) |           |           |
|---------------|---------------|-------------------------|-----------|-----------|
|               |               | X                       | Y         | Z         |
| 1             | 6             | 0.523167                | 1.266894  | -0.000852 |
| 2             | 6             | 1.075687                | -0.267346 | -0.695536 |
| 3             | 6             | -1.114583               | -0.405270 | -0.000174 |
| 4             | 6             | -0.993336               | 1.120455  | -0.001538 |
| 5             | 1             | 0.973033                | 1.782321  | 0.853766  |
| 6             | 1             | 0.973058                | 1.777692  | -0.858354 |
| 7             | 1             | -1.439678               | 1.576453  | 0.883672  |
| 8             | 1             | -1.438618               | 1.575146  | -0.887930 |
| 9             | 6             | -0.238449               | -0.813610 | -1.189994 |
| 10            | 1             | -0.142661               | -1.900502 | -1.291765 |
| 11            | 1             | -0.553333               | -0.398401 | -2.148939 |

|    |   |           |           |           |
|----|---|-----------|-----------|-----------|
| 12 | 6 | 1.074707  | -0.265161 | 0.697260  |
| 13 | 6 | -0.239800 | -0.811235 | 1.191350  |
| 14 | 1 | -0.143748 | -1.897840 | 1.295540  |
| 15 | 1 | -0.555904 | -0.393999 | 2.149012  |
| 16 | 1 | 1.966680  | -0.134824 | -1.301564 |
| 17 | 1 | 1.965133  | -0.132028 | 1.303955  |
| 18 | 1 | -2.128322 | -0.802386 | -0.000488 |

---

### 2-Norbornyl cation-benzene complex

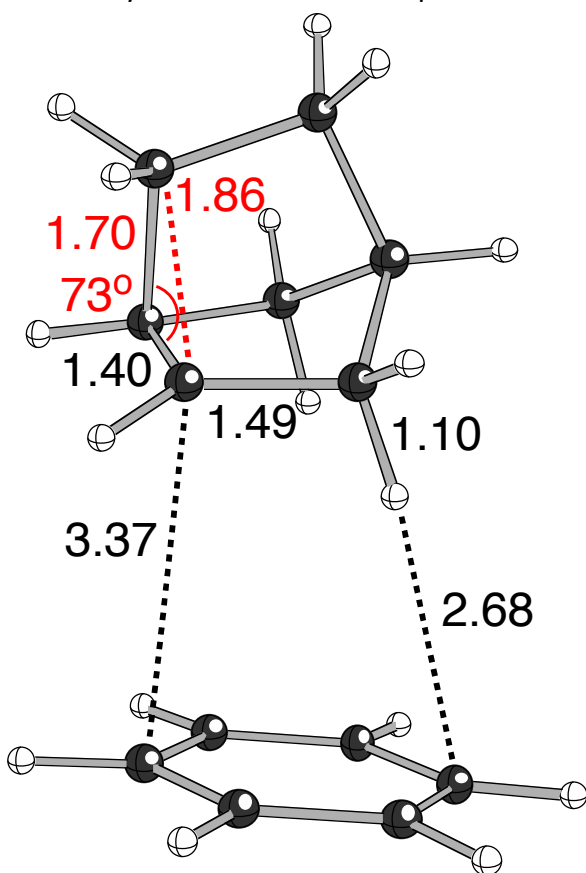

LC- $\omega$ PBE/6-31+G(d,p)//LC- $\omega$ PBE/6-31+G(d,p):  
HF = -505.009485 hartrees (-316898.50193235 kcal/mol)  
Imaginary Frequencies: none found  
Zero-point correction = 0.270729 (Hartree/Particle)  
Counterpoise: BSSE energy = 0.000577112

Coordinates (from last standard orientation):

---

| Center Number | Atomic Number | Coordinates (Angstroms) |   |   |
|---------------|---------------|-------------------------|---|---|
|               |               | X                       | Y | Z |

---

|    |   |           |           |           |
|----|---|-----------|-----------|-----------|
| 1  | 6 | -1.814982 | -0.733275 | 1.209943  |
| 2  | 6 | -2.002111 | -1.190768 | -0.238407 |
| 3  | 6 | -1.033322 | 0.906702  | -0.297287 |
| 4  | 6 | -1.680160 | 0.749066  | 0.931376  |
| 5  | 1 | -2.653456 | -0.976791 | 1.864617  |
| 6  | 1 | -0.887300 | -1.100382 | 1.659275  |
| 7  | 1 | -1.698854 | 1.522979  | 1.691685  |
| 8  | 6 | -0.881413 | -0.424628 | -0.954665 |
| 9  | 1 | -0.953713 | -0.395089 | -2.043380 |
| 10 | 6 | -3.273795 | -0.442335 | -0.646395 |
| 11 | 1 | -3.492173 | -0.520254 | -1.712765 |
| 12 | 1 | -4.146203 | -0.786466 | -0.088149 |
| 13 | 6 | -2.889146 | 0.978057  | -0.248287 |
| 14 | 1 | -2.726595 | 1.655868  | -1.096655 |
| 15 | 1 | -3.564243 | 1.543206  | 0.398384  |
| 16 | 1 | -2.009974 | -2.266809 | -0.404293 |
| 17 | 1 | -0.608266 | 1.839531  | -0.654366 |
| 18 | 1 | 0.116697  | -0.794124 | -0.680300 |
| 19 | 6 | 2.112984  | 0.344971  | 1.365697  |
| 20 | 6 | 2.359285  | -0.977987 | 1.013237  |
| 21 | 6 | 2.228773  | 1.351916  | 0.411406  |
| 22 | 6 | 2.719932  | -1.294033 | -0.292987 |
| 23 | 1 | 2.300127  | -1.761248 | 1.763673  |
| 24 | 6 | 2.587277  | 1.034909  | -0.895352 |
| 25 | 1 | 2.080579  | 2.390231  | 0.697193  |
| 26 | 6 | 2.832707  | -0.288080 | -1.247068 |
| 27 | 1 | 2.935457  | -2.323820 | -0.562356 |
| 28 | 1 | 2.707479  | 1.822979  | -1.633480 |
| 29 | 1 | 3.134872  | -0.533249 | -2.260906 |
| 30 | 1 | 1.869396  | 0.596343  | 2.394557  |

-----  
2-Norbornyl cation in the complex

LC- $\omega$ PBE/6-31+G(d,p)//LC- $\omega$ PBE/6-31+G(d,p):

HF = -272.9121028 hartrees (-171255.073628028 kcal/mol)

$\omega$ B97X-D

Benzene

$\omega$ B97X-D/6-31+G(d,p)// $\omega$ B97X-D/6-31+G(d,p):

HF = -232.1807124 hartrees (-145695.718838124 kcal/mol)

Zero-point correction = 0.101453 (Hartree/Particle)

Coordinates (from last standard orientation):



---

| Center<br>Number | Atomic<br>Number | Coordinates (Angstroms) |           |           |
|------------------|------------------|-------------------------|-----------|-----------|
|                  |                  | X                       | Y         | Z         |
| 1                | 6                | 0.281162                | -1.365274 | 0.000000  |
| 2                | 6                | -1.041974               | -0.926093 | -0.000001 |
| 3                | 6                | -1.323217               | 0.439334  | 0.000007  |
| 4                | 6                | -0.281134               | 1.365280  | 0.000000  |
| 5                | 6                | 1.041955                | 0.926114  | -0.000006 |
| 6                | 6                | 1.323209                | -0.439361 | 0.000001  |
| 7                | 1                | 0.499766                | -2.428854 | 0.000001  |
| 8                | 1                | -1.853685               | -1.647210 | -0.000001 |
| 9                | 1                | -2.353772               | 0.780946  | 0.000011  |
| 10               | 1                | -0.499809               | 2.428845  | -0.000001 |
| 11               | 1                | 1.853711                | 1.647180  | -0.000008 |
| 12               | 1                | 2.353785                | -0.780907 | -0.000001 |

---

Free 2-norboryl cation

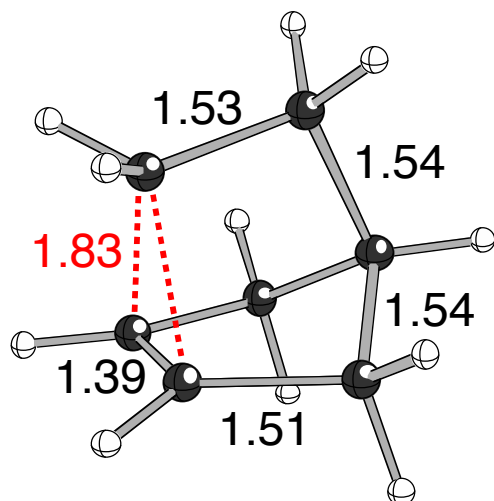

$\omega$ B97X-D/6-31+G(d,p)// $\omega$ B97X-D/6-31+G(d,p):

HF = -273.0046625 hartrees (-171313.155765375 kcal/mol)

Imaginary Frequencies: none found

Zero-point correction = 0.165731 (Hartree/Particle)

Coordinates (from last standard orientation):

---

| Center<br>Number | Atomic<br>Number | Coordinates (Angstroms) |   |   |
|------------------|------------------|-------------------------|---|---|
|                  |                  | X                       | Y | Z |

---

|    |   |           |           |           |
|----|---|-----------|-----------|-----------|
| 1  | 6 | 0.124170  | 1.397310  | -0.008093 |
| 2  | 6 | 1.124920  | 0.025250  | -0.694214 |
| 3  | 6 | -0.955378 | -0.704080 | 0.002147  |
| 4  | 6 | -1.281045 | 0.799081  | -0.008769 |
| 5  | 1 | 0.409763  | 2.008950  | 0.852667  |
| 6  | 1 | 0.414569  | 1.991697  | -0.879479 |
| 7  | 1 | -1.843149 | 1.107115  | 0.874412  |
| 8  | 1 | -1.837480 | 1.096487  | -0.899138 |
| 9  | 6 | 0.007351  | -0.858611 | -1.190508 |
| 10 | 1 | 0.395158  | -1.879769 | -1.288518 |
| 11 | 1 | -0.404947 | -0.547262 | -2.151747 |
| 12 | 6 | 1.119587  | 0.038050  | 0.699159  |
| 13 | 6 | 0.000633  | -0.841554 | 1.202130  |
| 14 | 1 | 0.388970  | -1.860629 | 1.316864  |
| 15 | 1 | -0.417625 | -0.516441 | 2.156192  |
| 16 | 1 | 1.937050  | 0.410291  | -1.301592 |
| 17 | 1 | 1.929267  | 0.430507  | 1.304973  |
| 18 | 1 | -1.813005 | -1.373618 | 0.004250  |

2-Norbornyl cation-benzene complex

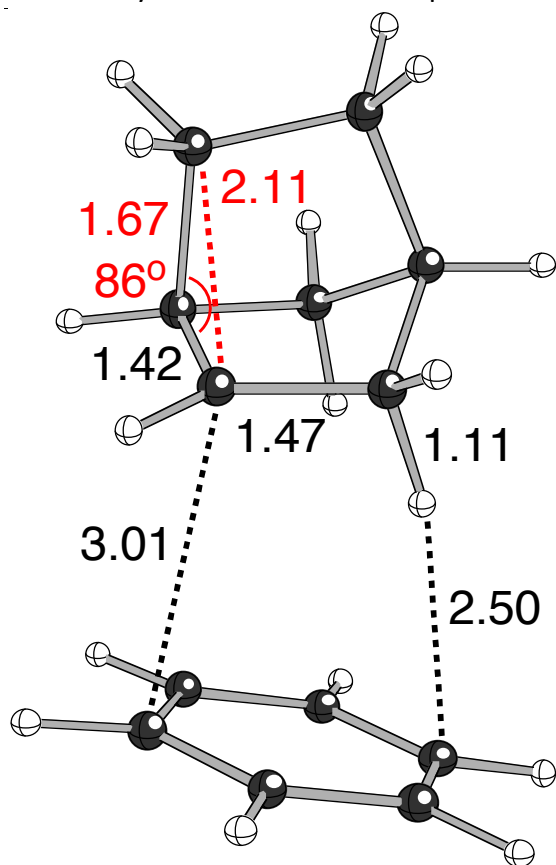

$\omega$ B97X-D/6-31+G(d,p)// $\omega$ B97X-D/6-31+G(d,p):

HF = -505.2046544 hartrees (-317020.972682544 kcal/mol)

Imaginary Frequencies: none found

Zero-point correction = 0.268294 (Hartree/Particle)

Counterpoise: BSSE energy = 0.0007639282

Coordinates (from last standard orientation):

```
-----
```

| Center | Atomic | Coordinates (Angstroms) |           |           |
|--------|--------|-------------------------|-----------|-----------|
| Number | Number | X                       | Y         | Z         |
| 1      | 6      | -1.670130               | -0.622698 | 1.226402  |
| 2      | 6      | -1.885076               | -1.209480 | -0.177357 |
| 3      | 6      | -0.802966               | 0.843724  | -0.408096 |
| 4      | 6      | -1.579024               | 0.838970  | 0.782324  |
| 5      | 1      | -2.502678               | -0.805680 | 1.908013  |
| 6      | 1      | -0.737997               | -0.947391 | 1.696224  |
| 7      | 1      | -1.527703               | 1.667478  | 1.481501  |
| 8      | 6      | -0.753791               | -0.514137 | -0.970936 |
| 9      | 1      | -0.805973               | -0.556035 | -2.061065 |
| 10     | 6      | -3.182470               | -0.511614 | -0.622091 |
| 11     | 1      | -3.374083               | -0.617473 | -1.691420 |
| 12     | 1      | -4.042687               | -0.908685 | -0.079404 |
| 13     | 6      | -2.905778               | 0.943629  | -0.222968 |
| 14     | 1      | -2.804997               | 1.632244  | -1.068629 |
| 15     | 1      | -3.632365               | 1.400930  | 0.453209  |
| 16     | 1      | -1.883164               | -2.295114 | -0.255440 |
| 17     | 1      | -0.428651               | 1.739982  | -0.891923 |
| 18     | 1      | 0.229963                | -0.923324 | -0.669787 |
| 19     | 6      | 1.877631                | 0.766721  | 1.189491  |
| 20     | 6      | 2.093872                | -0.607381 | 1.294850  |
| 21     | 6      | 2.122935                | 1.421742  | -0.021928 |
| 22     | 6      | 2.542728                | -1.327424 | 0.187443  |
| 23     | 1      | 1.936178                | -1.111788 | 2.243118  |
| 24     | 6      | 2.579526                | 0.701280  | -1.128176 |
| 25     | 1      | 2.002356                | 2.499477  | -0.089027 |
| 26     | 6      | 2.785659                | -0.672794 | -1.023823 |
| 27     | 1      | 2.726781                | -2.393558 | 0.273164  |
| 28     | 1      | 2.794027                | 1.213720  | -2.060574 |
| 29     | 1      | 3.154627                | -1.232466 | -1.877134 |
| 30     | 1      | 1.557672                | 1.334456  | 2.058358  |

```
-----
```

2-Norbornyl cation in the complex

$\omega$ B97X-D/6-31+G(d,p)// $\omega$ B97X-D/6-31+G(d,p):  
HF = -273.0007204 hartrees (-171310.682058204 kcal/mol)

### PBE1

Benzene

PBE1/6-31+G(d,p)//PBE1/6-31+G(d,p):  
HF = -231.9812391 hartrees (-145570.547347641 kcal/mol)  
Zero-point correction = 0.101194 (Hartree/Particle)

Coordinates (from last standard orientation):

| Center Number | Atomic Number | Coordinates (Angstroms) |           |           |
|---------------|---------------|-------------------------|-----------|-----------|
|               |               | X                       | Y         | Z         |
| 1             | 6             | -0.483629               | 1.307339  | 0.000000  |
| 2             | 6             | -1.374096               | 0.234830  | -0.000025 |
| 3             | 6             | -0.890479               | -1.072505 | 0.000016  |
| 4             | 6             | 0.483676                | -1.307322 | -0.000004 |
| 5             | 6             | 1.374088                | -0.234879 | -0.000015 |
| 6             | 6             | 0.890441                | 1.072536  | 0.000020  |
| 7             | 1             | -0.860611               | 2.326344  | 0.000004  |
| 8             | 1             | -2.445037               | 0.418088  | -0.000011 |
| 9             | 1             | -1.584465               | -1.908490 | 0.000017  |
| 10            | 1             | 0.860530                | -2.326375 | 0.000008  |
| 11            | 1             | 2.445052                | -0.418005 | -0.000007 |
| 12            | 1             | 1.584529                | 1.908435  | 0.000032  |

Free 2-norbornyl cation

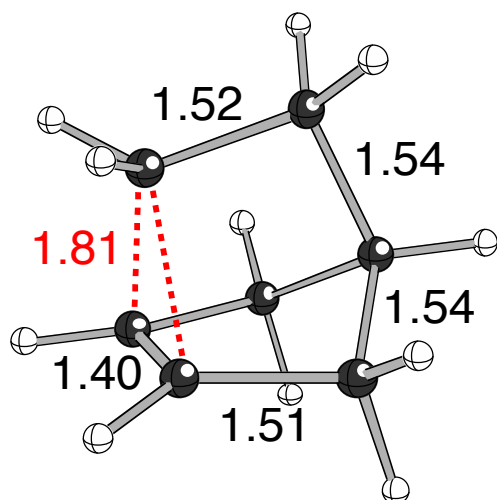

PBE1/6-31+G(d,p)//PBE1/6-31+G(d,p):

HF = -272.7589313 hartrees (-171158.956980063 kcal/mol)

Imaginary Frequencies: none found

Zero-point correction = 0.165036 (Hartree/Particle)

Coordinates (from last standard orientation):

```
-----
```

| Center<br>Number | Atomic<br>Number | Coordinates (Angstroms) |           |           |
|------------------|------------------|-------------------------|-----------|-----------|
|                  |                  | X                       | Y         | Z         |
| 1                | 6                | 0.257425                | 1.367826  | -0.004341 |
| 2                | 6                | 1.111340                | -0.072201 | -0.704979 |
| 3                | 6                | -1.016985               | -0.610582 | 0.008639  |
| 4                | 6                | -1.196025               | 0.914297  | 0.000175  |
| 5                | 1                | 0.609048                | 1.943514  | 0.859754  |
| 6                | 1                | 0.604568                | 1.948561  | -0.866672 |
| 7                | 1                | -1.725558               | 1.277968  | 0.883870  |
| 8                | 1                | -1.723740               | 1.264940  | -0.889829 |
| 9                | 6                | -0.083522               | -0.850303 | -1.189036 |
| 10               | 1                | 0.211522                | -1.903745 | -1.287126 |
| 11               | 1                | -0.474583               | -0.508136 | -2.149975 |
| 12               | 6                | 1.120219                | -0.066117 | 0.691540  |
| 13               | 6                | -0.069538               | -0.838656 | 1.197478  |
| 14               | 1                | 0.224894                | -1.891309 | 1.304367  |
| 15               | 1                | -0.449440               | -0.484810 | 2.158734  |
| 16               | 1                | 1.950909                | 0.239529  | -1.319447 |
| 17               | 1                | 1.970218                | 0.244658  | 1.292016  |
| 18               | 1                | -1.935330               | -1.196746 | 0.017447  |

```
-----
```

2-Norbornyl cation-benzene complex

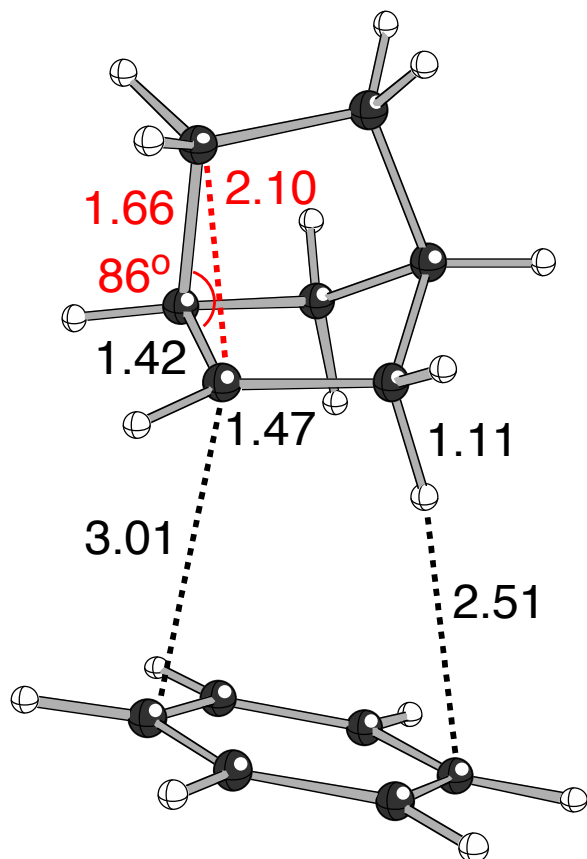

PBE1/6-31+G(d,p)//PBE1/6-31+G(d,p):  
HF = -504.7522558 hartrees (-316737.088037058 kcal/mol)  
Imaginary Frequencies: none found  
Zero-point correction = 0.267033 (Hartree/Particle)  
Counterpoise: BSSE energy = 0.0008036287

Coordinates (from last standard orientation):

| Center Number | Atomic Number | Coordinates (Angstroms) |           |           |
|---------------|---------------|-------------------------|-----------|-----------|
|               |               | X                       | Y         | Z         |
| 1             | 6             | -1.743024               | -0.616489 | 1.238537  |
| 2             | 6             | -1.916862               | -1.209368 | -0.164977 |
| 3             | 6             | -0.813523               | 0.833720  | -0.375392 |
| 4             | 6             | -1.630560               | 0.839604  | 0.791164  |
| 5             | 1             | -2.599009               | -0.792639 | 1.894280  |
| 6             | 1             | -0.828264               | -0.944609 | 1.741752  |
| 7             | 1             | -1.595928               | 1.671744  | 1.489473  |
| 8             | 6             | -0.760442               | -0.525738 | -0.927007 |
| 9             | 1             | -0.775553               | -0.578755 | -2.019117 |
| 10            | 6             | -3.191707               | -0.503758 | -0.649782 |

|    |   |           |           |           |
|----|---|-----------|-----------|-----------|
| 11 | 1 | -3.361081 | -0.617568 | -1.723233 |
| 12 | 1 | -4.070344 | -0.887811 | -0.124399 |
| 13 | 6 | -2.910228 | 0.947933  | -0.255545 |
| 14 | 1 | -2.769782 | 1.625117  | -1.107457 |
| 15 | 1 | -3.657646 | 1.431317  | 0.382761  |
| 16 | 1 | -1.921489 | -2.296998 | -0.236962 |
| 17 | 1 | -0.422511 | 1.726579  | -0.854507 |
| 18 | 1 | 0.216229  | -0.938224 | -0.594340 |
| 19 | 6 | 1.950326  | 0.429795  | 1.353921  |
| 20 | 6 | 2.257907  | -0.904993 | 1.093729  |
| 21 | 6 | 2.056480  | 1.382433  | 0.334397  |
| 22 | 6 | 2.668436  | -1.288468 | -0.185684 |
| 23 | 1 | 2.202744  | -1.642855 | 1.889217  |
| 24 | 6 | 2.481665  | 0.999163  | -0.942674 |
| 25 | 1 | 1.869205  | 2.431266  | 0.552392  |
| 26 | 6 | 2.783617  | -0.335699 | -1.202506 |
| 27 | 1 | 2.926690  | -2.324912 | -0.383883 |
| 28 | 1 | 2.602213  | 1.745968  | -1.722853 |
| 29 | 1 | 3.129152  | -0.633874 | -2.188067 |
| 30 | 1 | 1.662856  | 0.737439  | 2.355859  |

-----  
2-Norbornyl cation in the complex

PBE1/6-31+G(d,p)//PBE1/6-31+G(d,p):

HF = -272.7546953 hartrees (-171156.298847703 kcal/mol)

B971

Benzene

B971/6-31+G(d,p)//B971/6-31+G(d,p):

HF = -232.1931067 hartrees (-145703.496385317 kcal/mol)

Imaginary Frequencies: none found

Zero-point correction = 0.100143 (Hartree/Particle)

Coordinates (from last standard orientation):

-----

| Center<br>Number | Atomic<br>Number | Coordinates (Angstroms) |           |           |
|------------------|------------------|-------------------------|-----------|-----------|
|                  |                  | X                       | Y         | Z         |
| 1                | 6                | -0.814729               | -1.140346 | -0.000003 |
| 2                | 6                | 0.580300                | -1.275717 | -0.000075 |
| 3                | 6                | 1.395060                | -0.135349 | 0.000052  |
| 4                | 6                | 0.814709                | 1.140360  | -0.000010 |
| 5                | 6                | -0.580278               | 1.275727  | -0.000056 |

-----

|    |   |           |           |           |
|----|---|-----------|-----------|-----------|
| 6  | 6 | -1.395062 | 0.135325  | 0.000063  |
| 7  | 1 | -1.447124 | -2.025620 | 0.000056  |
| 8  | 1 | 1.030569  | -2.266112 | -0.000073 |
| 9  | 1 | 2.477893  | -0.240425 | 0.000129  |
| 10 | 1 | 1.447149  | 2.025602  | 0.000002  |
| 11 | 1 | -1.030599 | 2.266099  | -0.000015 |
| 12 | 1 | -2.477889 | 0.240456  | 0.000080  |

---

Free 2-norbornyl cation

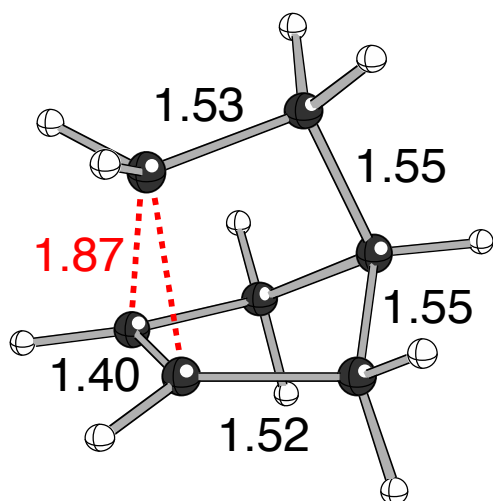

B971/6-31+G(d,p)//B971/6-31+G(d,p):

HF = -273.0025953 hartrees (-171311.858576703 kcal/mol)

Imaginary Frequencies: none found

Zero-point correction = 0.163339 (Hartree/Particle)

Coordinates (from last standard orientation):

---

| Center Number | Atomic Number | Coordinates (Angstroms) |           |           |
|---------------|---------------|-------------------------|-----------|-----------|
|               |               | X                       | Y         | Z         |
| 1             | 6             | 0.167750                | 1.414821  | -0.000006 |
| 2             | 6             | -1.108877               | 0.244299  | 0.700017  |
| 3             | 6             | 0.803384                | -0.880380 | 0.000002  |
| 4             | 6             | 1.424311                | 0.537870  | -0.000006 |
| 5             | 1             | -0.005210               | 2.055193  | -0.872685 |
| 6             | 1             | -0.005203               | 2.055202  | 0.872668  |
| 7             | 1             | 2.035125                | 0.721438  | -0.888909 |
| 8             | 1             | 2.035130                | 0.721444  | 0.888892  |



|    |   |           |           |           |
|----|---|-----------|-----------|-----------|
| 9  | 6 | -0.173454 | -0.837295 | 1.202815  |
| 10 | 1 | -0.748776 | -1.769028 | 1.307483  |
| 11 | 1 | 0.292549  | -0.605894 | 2.165106  |
| 12 | 6 | -1.108882 | 0.244290  | -0.700014 |
| 13 | 6 | -0.173460 | -0.837306 | -1.202806 |
| 14 | 1 | -0.748782 | -1.769040 | -1.307463 |
| 15 | 1 | 0.292537  | -0.605913 | -2.165102 |
| 16 | 1 | -1.823472 | 0.793070  | 1.308828  |
| 17 | 1 | -1.823481 | 0.793056  | -1.308827 |
| 18 | 1 | 1.514953  | -1.707316 | 0.000003  |

---

### 2-Norbornyl cation-benzene complex

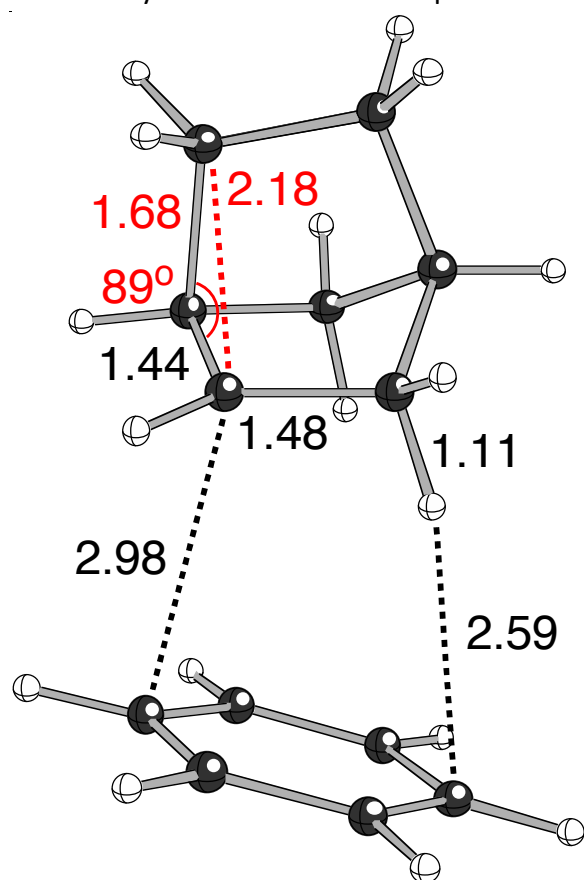

B971/6-31+G(d,p)//B971/6-31+G(d,p):

HF = -505.2088572 hartrees (-317023.609981572 kcal/mol)

Imaginary Frequencies: none found

Zero-point correction = 0.264500 (Hartree/Particle)

Counterpoise: BSSE energy = 0.0008167291

Coordinates (from last standard orientation):

---

| Center<br>Number | Atomic<br>Number | Coordinates (Angstroms) |           |           |
|------------------|------------------|-------------------------|-----------|-----------|
|                  |                  | X                       | Y         | Z         |
| 1                | 6                | -1.747449               | -0.619270 | 1.240136  |
| 2                | 6                | -1.935948               | -1.219755 | -0.171397 |
| 3                | 6                | -0.799742               | 0.827193  | -0.389864 |
| 4                | 6                | -1.633559               | 0.846986  | 0.777143  |
| 5                | 1                | -2.602250               | -0.786219 | 1.902887  |
| 6                | 1                | -0.829738               | -0.950903 | 1.737974  |
| 7                | 1                | -1.586392               | 1.682533  | 1.472902  |
| 8                | 6                | -0.767269               | -0.540577 | -0.947010 |
| 9                | 1                | -0.794686               | -0.585041 | -2.041608 |
| 10               | 6                | -3.225845               | -0.511315 | -0.655381 |
| 11               | 1                | -3.383486               | -0.607468 | -1.733882 |
| 12               | 1                | -4.103167               | -0.920063 | -0.143749 |
| 13               | 6                | -2.971688               | 0.949465  | -0.228264 |
| 14               | 1                | -2.869064               | 1.657087  | -1.059437 |
| 15               | 1                | -3.710255               | 1.376789  | 0.460245  |
| 16               | 1                | -1.941921               | -2.309025 | -0.239999 |
| 17               | 1                | -0.419555               | 1.717144  | -0.886039 |
| 18               | 1                | 0.203598                | -0.979066 | -0.628553 |
| 19               | 6                | 1.967895                | 0.256751  | 1.406236  |
| 20               | 6                | 2.347795                | -1.023160 | 0.981974  |
| 21               | 6                | 2.002282                | 1.334288  | 0.502081  |
| 22               | 6                | 2.763941                | -1.226713 | -0.344883 |
| 23               | 1                | 2.343873                | -1.855038 | 1.682515  |
| 24               | 6                | 2.437088                | 1.131568  | -0.821803 |
| 25               | 1                | 1.759276                | 2.337674  | 0.846707  |
| 26               | 6                | 2.814029                | -0.148201 | -1.244485 |
| 27               | 1                | 3.076294                | -2.216404 | -0.669770 |
| 28               | 1                | 2.506479                | 1.974358  | -1.506387 |
| 29               | 1                | 3.164823                | -0.305572 | -2.261607 |
| 30               | 1                | 1.676986                | 0.425651  | 2.440903  |

2-Norbornyl cation in the complex

B971/6-31+G(d,p)//B971/6-31+G(d,p):

HF = -272.9983361 hartrees (-171309.185886111 kcal/mol)

B3LYP-DCP

Benzene

B3LYP-DCP/6-31+G(d,p)//B971/6-31+G(d,p):

HF = -231.5611469 hartrees (-145304.6196797500 kcal/mol)

Free 2-norbornyl cation

B3LYP-DCP/6-31+G(d,p)//B971/6-31+G(d,p):

HF = -272.2833516 hartrees (-170857.8031290000 kcal/mol)

2-Norbornyl cation-benzene complex

B3LYP-DCP/6-31+G(d,p)//B971/6-31+G(d,p):

HF = -503.8610205 hartrees (-316172.7903637500 kcal/mol)

2-Norbornyl cation in the complex

B3LYP-DCP/6-31+G(d,p)//B971/6-31+G(d,p):

HF = -272.9380555 hartrees (-171268.6298262500 kcal/mol)

### MO6-2X

Benzene

MO6-2X/6-31+G(d,p)//MO6-2X/6-31+G(d,p):

HF = -232.1520475 hartrees (-145677.731326725 kcal/mol)

Zero-point correction = 0.101285 (Hartree/Particle)

Coordinates (from last standard orientation):

| -----  |        |                         |           |           |
|--------|--------|-------------------------|-----------|-----------|
| Center | Atomic | Coordinates (Angstroms) |           |           |
| Number | Number | X                       | Y         | Z         |
| -----  |        |                         |           |           |
| 1      | 6      | 0.173416                | -1.383541 | 0.000055  |
| 2      | 6      | -1.111643               | -0.841940 | 0.000046  |
| 3      | 6      | 1.285053                | -0.541667 | -0.000147 |
| 4      | 6      | -1.285062               | 0.541640  | -0.000124 |
| 5      | 1      | -1.977006               | -1.497687 | 0.000148  |
| 6      | 6      | 1.111621                | 0.841966  | 0.000065  |
| 7      | 1      | 2.285611                | -0.963224 | -0.000092 |
| 8      | 6      | -0.173390               | 1.383543  | 0.000038  |
| 9      | 1      | -2.285598               | 0.963246  | -0.000073 |
| 10     | 1      | 1.977024                | 1.497663  | 0.000178  |
| 11     | 1      | -0.308520               | 2.460809  | 0.000104  |
| 12     | 1      | 0.308516                | -2.460813 | 0.000140  |
| -----  |        |                         |           |           |

Free 2-norbornyl cation

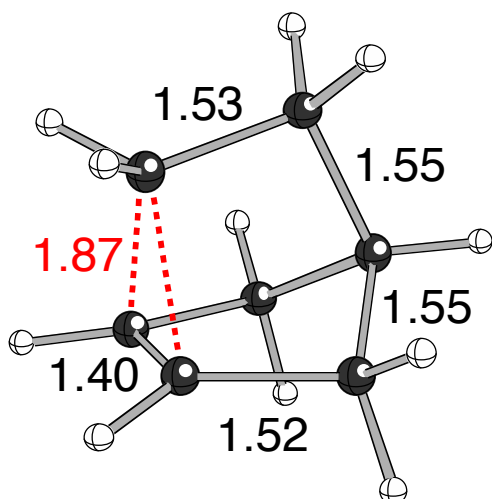

MO6-2X/6-31+G(d,p)//MO6-2X/6-31+G(d,p):

HF = -272.9457702 hartrees (-171276.200258202 kcal/mol)

Imaginary Frequencies: none found

Zero-point correction = 0.165461 (Hartree/Particle)

Coordinates (from last standard orientation):

| Center Number | Atomic Number | Coordinates (Angstroms) |           |           |
|---------------|---------------|-------------------------|-----------|-----------|
|               |               | X                       | Y         | Z         |
| 1             | 6             | 0.210465                | 1.385353  | -0.006245 |
| 2             | 6             | 1.125021                | -0.040399 | -0.694775 |
| 3             | 6             | -0.998228               | -0.645247 | 0.001088  |
| 4             | 6             | -1.228988               | 0.875359  | -0.007416 |
| 5             | 1             | 0.533830                | 1.973880  | 0.857796  |
| 6             | 1             | 0.538504                | 1.959895  | -0.878037 |
| 7             | 1             | -1.769369               | 1.216493  | 0.877483  |
| 8             | 1             | -1.765225               | 1.207923  | -0.898059 |
| 9             | 6             | -0.046339               | -0.855777 | -1.190966 |
| 10            | 1             | 0.280999                | -1.898736 | -1.286933 |
| 11            | 1             | -0.439153               | -0.518049 | -2.151910 |
| 12            | 6             | 1.120647                | -0.030430 | 0.699788  |
| 13            | 6             | -0.052140               | -0.842208 | 1.199899  |
| 14            | 1             | 0.275438                | -1.883637 | 1.309587  |
| 15            | 1             | -0.450139               | -0.493623 | 2.154788  |
| 16            | 1             | 1.957680                | 0.300238  | -1.302349 |
| 17            | 1             | 1.950855                | 0.316284  | 1.307243  |
| 18            | 1             | -1.896050               | -1.260575 | 0.002161  |

2-Norbornyl cation-benzene complex

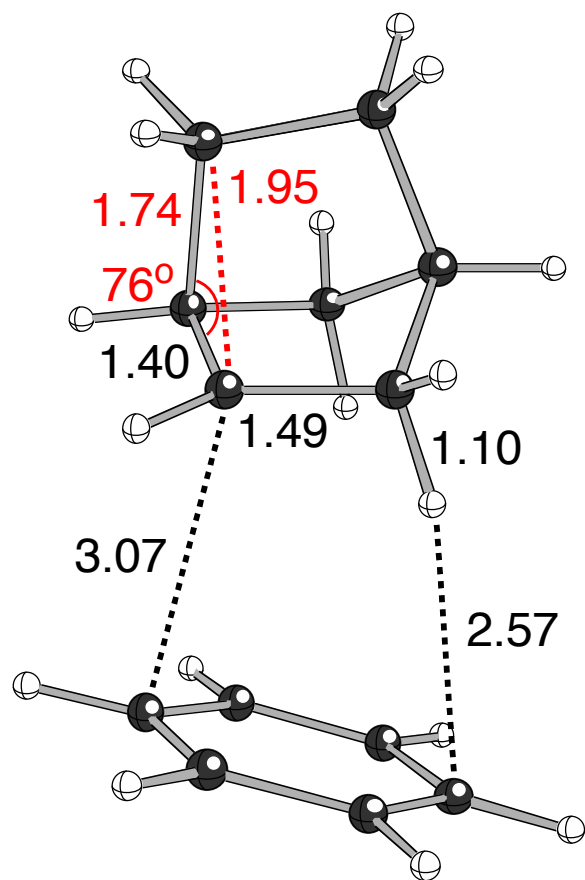

MO6-2X/6-31+G(d,p)//MO6-2X/6-31+G(d,p):  
HF = -505.1144004 hartrees (-316964.337395004 kcal/mol)  
Zero-point correction = 0.267496 (Hartree/Particle)  
Counterpoise: BSSE energy = 0.000676759544

Coordinates (from last standard orientation):

| Center Number | Atomic Number | Coordinates (Angstroms) |           |           |
|---------------|---------------|-------------------------|-----------|-----------|
|               |               | X                       | Y         | Z         |
| 1             | 6             | -1.687392               | -0.817062 | 1.141269  |
| 2             | 6             | -1.900444               | -1.182932 | -0.336505 |
| 3             | 6             | -0.917987               | 0.922707  | -0.265773 |
| 4             | 6             | -1.565931               | 0.688166  | 0.955225  |
| 5             | 1             | -2.514277               | -1.106239 | 1.792533  |
| 6             | 1             | -0.747009               | -1.206762 | 1.545159  |
| 7             | 1             | -1.577876               | 1.412769  | 1.762704  |
| 8             | 6             | -0.793900               | -0.356985 | -1.024257 |

|    |   |           |           |           |
|----|---|-----------|-----------|-----------|
| 9  | 1 | -0.885659 | -0.244972 | -2.106798 |
| 10 | 6 | -3.198687 | -0.430349 | -0.674092 |
| 11 | 1 | -3.420872 | -0.429219 | -1.742705 |
| 12 | 1 | -4.054564 | -0.846065 | -0.138607 |
| 13 | 6 | -2.863385 | 0.972305  | -0.165805 |
| 14 | 1 | -2.739313 | 1.731259  | -0.946410 |
| 15 | 1 | -3.531913 | 1.424118  | 0.571397  |
| 16 | 1 | -1.894869 | -2.245786 | -0.571913 |
| 17 | 1 | -0.540825 | 1.888203  | -0.587689 |
| 18 | 1 | 0.208763  | -0.753741 | -0.794856 |
| 19 | 6 | 1.917330  | 0.127165  | 1.402933  |
| 20 | 6 | 2.277616  | -1.111713 | 0.870524  |
| 21 | 6 | 2.001509  | 1.277108  | 0.613348  |
| 22 | 6 | 2.720358  | -1.201017 | -0.451323 |
| 23 | 1 | 2.241347  | -2.002387 | 1.490723  |
| 24 | 6 | 2.439944  | 1.186377  | -0.710287 |
| 25 | 1 | 1.766121  | 2.247990  | 1.042408  |
| 26 | 6 | 2.799220  | -0.052659 | -1.242026 |
| 27 | 1 | 3.021805  | -2.161170 | -0.858306 |
| 28 | 1 | 2.531638  | 2.083597  | -1.315672 |
| 29 | 1 | 3.160379  | -0.121062 | -2.263283 |
| 30 | 1 | 1.607613  | 0.202799  | 2.441930  |

2-Norbornyl cation in the complex

MO6-2X/6-31+G(d,p)//MO6-2X/6-31+G(d,p):

HF = -272.944381 hartrees (-171275.32852131 kcal/mol)

**Figure 1**

(a)

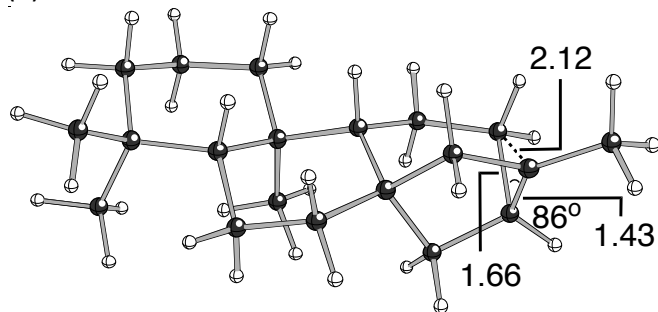

B3LYP/6-31+G(d,p)//B3LYP/6-31+G(d,p):

HF = -781.7943597 hartrees (-490583.778655347 kcal/mol)

Imaginary Frequencies: none found

Zero-point correction = 0.491134 (Hartree/Particle)

Coordinates (from last standard orientation):

| Center<br>Number | Atomic<br>Number | Coordinates (Angstroms) |           |           |
|------------------|------------------|-------------------------|-----------|-----------|
|                  |                  | X                       | Y         | Z         |
| 1                | 6                | 3.174352                | -0.550778 | -0.204333 |
| 2                | 6                | 1.600782                | -0.589642 | -0.195476 |
| 3                | 6                | 0.838428                | 0.738265  | 0.147919  |
| 4                | 6                | 1.446785                | 1.903469  | -0.680680 |
| 5                | 6                | 2.972350                | 2.003083  | -0.560241 |
| 6                | 6                | 3.639294                | 0.696507  | -0.998394 |
| 7                | 1                | 1.348507                | -0.785385 | -1.251611 |
| 8                | 1                | 1.197508                | 1.753522  | -1.741697 |
| 9                | 1                | 0.991068                | 2.856004  | -0.382968 |
| 10               | 1                | 3.328771                | 2.827952  | -1.187781 |
| 11               | 1                | 3.261073                | 2.261833  | 0.465451  |
| 12               | 1                | 3.418655                | 0.535743  | -2.063955 |
| 13               | 1                | 4.730206                | 0.781230  | -0.922093 |
| 14               | 6                | -0.661082               | 0.550815  | -0.328737 |
| 15               | 6                | 0.993194                | -1.751331 | 0.610283  |
| 16               | 1                | 1.558632                | -2.673392 | 0.450021  |
| 17               | 1                | 1.039279                | -1.553018 | 1.685953  |
| 18               | 6                | -0.446548               | -2.003130 | 0.157758  |
| 19               | 6                | -1.382357               | -0.771274 | 0.124502  |
| 20               | 6                | 3.835666                | -0.568323 | 1.193722  |
| 21               | 1                | 3.433139                | -1.363581 | 1.829329  |
| 22               | 1                | 4.909083                | -0.756569 | 1.083878  |
| 23               | 1                | 3.737938                | 0.375128  | 1.735090  |
| 24               | 6                | 3.689658                | -1.796732 | -0.964117 |
| 25               | 1                | 3.214554                | -1.895274 | -1.947302 |
| 26               | 1                | 4.769263                | -1.712870 | -1.127894 |
| 27               | 1                | 3.522461                | -2.725641 | -0.409712 |
| 28               | 6                | 0.932837                | 1.100825  | 1.650907  |
| 29               | 1                | 1.969453                | 1.139413  | 1.979262  |
| 30               | 1                | 0.515904                | 2.091525  | 1.854333  |
| 31               | 1                | 0.429070                | 0.385030  | 2.304307  |
| 32               | 6                | -2.550845               | -1.115833 | -0.865870 |
| 33               | 1                | -2.806124               | -2.188325 | -0.772302 |
| 34               | 1                | -0.597283               | 0.499515  | -1.425023 |
| 35               | 6                | -1.532640               | 1.784391  | 0.039987  |
| 36               | 1                | -1.299158               | 2.119997  | 1.051905  |
| 37               | 1                | -1.305389               | 2.623450  | -0.624283 |
| 38               | 6                | -3.038338               | 1.543326  | -0.021062 |

|    |   |           |           |           |
|----|---|-----------|-----------|-----------|
| 39 | 1 | -3.367987 | 1.495957  | -1.070398 |
| 40 | 1 | -3.647655 | 2.335736  | 0.421308  |
| 41 | 6 | -3.764425 | -0.416860 | -0.373486 |
| 42 | 1 | -2.340031 | -0.954368 | -1.929046 |
| 43 | 6 | -5.088911 | -0.453214 | -1.030301 |
| 44 | 1 | -5.531393 | -1.422715 | -0.748521 |
| 45 | 1 | -5.765172 | 0.324179  | -0.668234 |
| 46 | 1 | -5.023460 | -0.441126 | -2.121211 |
| 47 | 6 | -3.452795 | 0.203932  | 0.876158  |
| 48 | 6 | -2.195799 | -0.489739 | 1.421656  |
| 49 | 1 | -4.264009 | 0.455277  | 1.557335  |
| 50 | 1 | -2.501037 | -1.420613 | 1.914590  |
| 51 | 1 | -1.671406 | 0.114938  | 2.160866  |
| 52 | 1 | -0.393079 | -2.402204 | -0.864566 |
| 53 | 1 | -0.919009 | -2.787894 | 0.763807  |

(b)

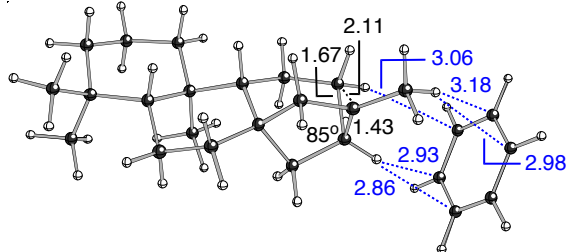

B3LYP/6-31+G(d,p)//B3LYP/6-31+G(d,p):

HF = -1014.0701728 hartrees (-636339.174133728 kcal/mol)

Imaginary Frequencies: none found

Zero-point correction = 0.592431 (Hartree/Particle)

Counterpoise: BSSE energy = 0.000744026756 hartrees

Coordinates (from last standard orientation):

| Center<br>Number | Atomic<br>Number | Coordinates (Angstroms) |           |           |
|------------------|------------------|-------------------------|-----------|-----------|
|                  |                  | X                       | Y         | Z         |
| 1                | 6                | -4.767674               | 0.072976  | 0.260550  |
| 2                | 6                | -3.249689               | 0.451179  | 0.084119  |
| 3                | 6                | -2.225986               | -0.718215 | -0.136567 |
| 4                | 6                | -2.778571               | -1.675166 | -1.227772 |
| 5                | 6                | -4.214207               | -2.141201 | -0.957287 |
| 6                | 6                | -5.162486               | -0.945316 | -0.839720 |
| 7                | 1                | -3.238701               | 1.007450  | -0.868842 |



|    |   |           |           |           |
|----|---|-----------|-----------|-----------|
| 8  | 1 | -2.764693 | -1.154967 | -2.197137 |
| 9  | 1 | -2.121597 | -2.547649 | -1.331069 |
| 10 | 1 | -4.540973 | -2.791986 | -1.776512 |
| 11 | 1 | -4.253233 | -2.758409 | -0.051772 |
| 12 | 1 | -5.184294 | -0.423696 | -1.807826 |
| 13 | 1 | -6.187880 | -1.288770 | -0.655557 |
| 14 | 6 | -0.893839 | -0.072104 | -0.701549 |
| 15 | 6 | -2.703898 | 1.417521  | 1.148810  |
| 16 | 1 | -3.438804 | 2.193147  | 1.381600  |
| 17 | 1 | -2.507452 | 0.896422  | 2.091540  |
| 18 | 6 | -1.443168 | 2.108771  | 0.627010  |
| 19 | 6 | -0.336646 | 1.183580  | 0.066980  |
| 20 | 6 | -5.144806 | -0.478357 | 1.655880  |
| 21 | 1 | -4.766867 | 0.156426  | 2.463870  |
| 22 | 1 | -6.235675 | -0.505885 | 1.751455  |
| 23 | 1 | -4.789574 | -1.495362 | 1.834869  |
| 24 | 6 | -5.617555 | 1.346292  | 0.033443  |
| 25 | 1 | -5.359311 | 1.840493  | -0.910502 |
| 26 | 1 | -6.679284 | 1.081616  | -0.013215 |
| 27 | 1 | -5.505836 | 2.075969  | 0.841772  |
| 28 | 6 | -1.977824 | -1.534406 | 1.156053  |
| 29 | 1 | -2.914245 | -1.903171 | 1.569490  |
| 30 | 1 | -1.363686 | -2.419052 | 0.963442  |
| 31 | 1 | -1.494542 | -0.957355 | 1.948100  |
| 32 | 6 | 0.542784  | 2.055113  | -0.896964 |
| 33 | 1 | 0.628041  | 3.079957  | -0.490562 |
| 34 | 1 | -1.165838 | 0.285783  | -1.704840 |
| 35 | 6 | 0.231268  | -1.131688 | -0.864421 |
| 36 | 1 | 0.260582  | -1.785090 | 0.009173  |
| 37 | 6 | 1.630521  | -0.551486 | -1.043661 |
| 38 | 6 | 1.928896  | 1.522321  | -0.824402 |
| 39 | 6 | 3.075186  | 2.036285  | -1.605071 |
| 40 | 1 | 3.379806  | 2.967438  | -1.100649 |
| 41 | 1 | 3.935786  | 1.364119  | -1.580845 |
| 42 | 1 | 2.804357  | 2.305826  | -2.629302 |
| 43 | 6 | 1.977816  | 0.518823  | 0.188877  |
| 44 | 6 | 0.746954  | 0.720313  | 1.083790  |
| 45 | 1 | -1.759690 | 2.775264  | -0.187183 |
| 46 | 1 | -1.002039 | 2.758513  | 1.394621  |
| 47 | 1 | 0.026417  | -1.774919 | -1.725571 |
| 48 | 1 | 2.449370  | -1.270795 | -0.961816 |
| 49 | 1 | 1.733800  | -0.127526 | -2.053919 |
| 50 | 1 | 0.485252  | -0.176308 | 1.645181  |
| 51 | 1 | 2.936015  | 0.251139  | 0.631235  |

|    |   |          |           |           |
|----|---|----------|-----------|-----------|
| 52 | 1 | 0.158518 | 2.170482  | -1.916600 |
| 53 | 1 | 0.976580 | 1.507599  | 1.812142  |
| 54 | 6 | 5.428839 | -0.481749 | 1.835146  |
| 55 | 6 | 5.037427 | -1.689678 | 1.244535  |
| 56 | 6 | 5.313916 | -1.930664 | -0.106573 |
| 57 | 6 | 5.982173 | -0.963982 | -0.867270 |
| 58 | 6 | 6.374251 | 0.242772  | -0.276141 |
| 59 | 6 | 6.097357 | 0.484140  | 1.074630  |
| 60 | 1 | 5.238102 | -0.306189 | 2.890107  |
| 61 | 1 | 4.544738 | -2.451412 | 1.842447  |
| 62 | 1 | 5.040313 | -2.881417 | -0.556027 |
| 63 | 1 | 6.223838 | -1.163370 | -1.907609 |
| 64 | 1 | 6.921608 | 0.979510  | -0.857753 |
| 65 | 1 | 6.424864 | 1.409724  | 1.539493  |

---

Kauranyl cation in the complex

(c)

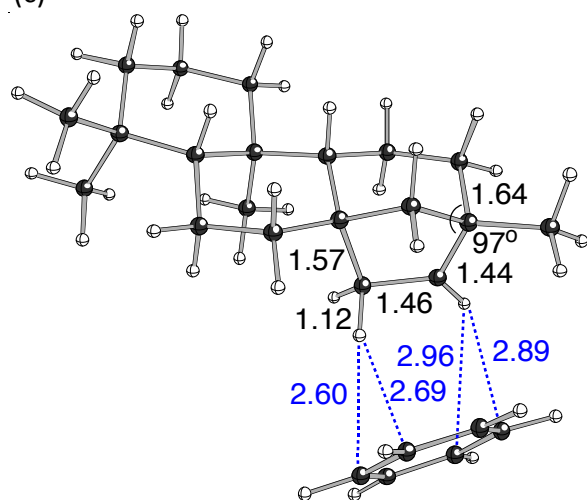

B3LYP/6-31+G(d,p)//B3LYP/6-31+G(d,p):

HF = -1014.0681291 hartrees (-636337.891691541 kcal/mol)

Imaginary Frequencies: 1 (-10.3938 1/cm)

Zero-point correction = 0.592155 (Hartree/Particle)

Counterpoise: BSSE energy = 0.001032073148 hartrees

Coordinates (from last standard orientation):

---

| Center Number | Atomic Number | Coordinates (Angstroms) |   |   |
|---------------|---------------|-------------------------|---|---|
|               |               | X                       | Y | Z |

---

|    |   |           |           |           |
|----|---|-----------|-----------|-----------|
| 1  | 6 | -3.999791 | -1.253383 | 0.388147  |
| 2  | 6 | -2.586185 | -0.574454 | 0.519406  |
| 3  | 6 | -2.209899 | 0.533499  | -0.525463 |
| 4  | 6 | -3.391162 | 1.535046  | -0.650565 |
| 5  | 6 | -4.741468 | 0.856731  | -0.913163 |
| 6  | 6 | -5.069696 | -0.149757 | 0.193766  |
| 7  | 1 | -2.655097 | -0.034351 | 1.479024  |
| 8  | 1 | -3.472470 | 2.106602  | 0.286102  |
| 9  | 1 | -3.184632 | 2.263071  | -1.444697 |
| 10 | 1 | -5.524648 | 1.622091  | -0.959439 |
| 11 | 1 | -4.742664 | 0.368850  | -1.895345 |
| 12 | 1 | -5.179831 | 0.400898  | 1.139519  |
| 13 | 1 | -6.040143 | -0.623770 | 0.001939  |
| 14 | 6 | -0.971652 | 1.330350  | 0.064571  |
| 15 | 6 | -1.413475 | -1.560066 | 0.668191  |
| 16 | 1 | -1.682348 | -2.385364 | 1.333491  |
| 17 | 1 | -1.157354 | -2.019057 | -0.292226 |
| 18 | 6 | -0.204670 | -0.846239 | 1.273726  |
| 19 | 6 | 0.233865  | 0.465814  | 0.580965  |
| 20 | 6 | -4.112560 | -2.311456 | -0.734226 |
| 21 | 1 | -3.295762 | -3.039482 | -0.693856 |
| 22 | 1 | -5.047350 | -2.869320 | -0.613494 |
| 23 | 1 | -4.130462 | -1.882255 | -1.738285 |
| 24 | 6 | -4.321521 | -1.973284 | 1.720538  |
| 25 | 1 | -4.196794 | -1.305124 | 2.580739  |
| 26 | 1 | -5.362169 | -2.314877 | 1.717642  |
| 27 | 1 | -3.695894 | -2.856921 | 1.881185  |
| 28 | 6 | -1.915422 | -0.056221 | -1.926853 |
| 29 | 1 | -2.763617 | -0.631394 | -2.292626 |
| 30 | 1 | -1.742634 | 0.728935  | -2.668688 |
| 31 | 1 | -1.055035 | -0.728780 | -1.944661 |
| 32 | 6 | 1.071202  | 1.274138  | 1.634993  |
| 33 | 1 | 1.667169  | 0.568808  | 2.243842  |
| 34 | 1 | -1.373393 | 1.848465  | 0.947008  |
| 35 | 6 | -0.462940 | 2.409896  | -0.932568 |
| 36 | 1 | -0.454946 | 2.008626  | -1.947203 |
| 37 | 6 | 0.941819  | 2.936219  | -0.648286 |
| 38 | 6 | 2.094991  | 2.042738  | 0.884384  |
| 39 | 6 | 3.083269  | 2.957684  | 1.494921  |
| 40 | 1 | 3.875301  | 2.304515  | 1.894999  |
| 41 | 1 | 3.553891  | 3.622013  | 0.766914  |
| 42 | 1 | 2.677258  | 3.522409  | 2.337796  |
| 43 | 6 | 2.018746  | 1.672866  | -0.492898 |
| 44 | 6 | 1.287242  | 0.325020  | -0.555890 |

|    |   |           |           |           |
|----|---|-----------|-----------|-----------|
| 45 | 1 | -0.468982 | -0.597468 | 2.311099  |
| 46 | 1 | 0.663377  | -1.516072 | 1.334078  |
| 47 | 1 | -1.141299 | 3.268302  | -0.944482 |
| 48 | 1 | 1.377598  | 3.533045  | -1.453654 |
| 49 | 1 | 0.918984  | 3.615439  | 0.217333  |
| 50 | 1 | 0.865450  | 0.122644  | -1.539762 |
| 51 | 1 | 2.882564  | 1.842298  | -1.132806 |
| 52 | 1 | 0.493909  | 1.871911  | 2.349463  |
| 53 | 1 | 2.014998  | -0.462797 | -0.332957 |
| 54 | 6 | 4.355009  | -2.017164 | -1.683427 |
| 55 | 6 | 5.131997  | -0.884085 | -1.417135 |
| 56 | 6 | 5.428805  | -0.533405 | -0.094701 |
| 57 | 6 | 4.942156  | -1.313231 | 0.961147  |
| 58 | 6 | 4.163479  | -2.444950 | 0.693549  |
| 59 | 6 | 3.871928  | -2.799358 | -0.628277 |
| 60 | 1 | 4.143192  | -2.300030 | -2.710492 |
| 61 | 1 | 5.532456  | -0.296694 | -2.238832 |
| 62 | 1 | 6.067105  | 0.322486  | 0.109155  |
| 63 | 1 | 5.199167  | -1.063030 | 1.987209  |
| 64 | 1 | 3.804775  | -3.062501 | 1.512205  |
| 65 | 1 | 3.285938  | -3.689810 | -0.836347 |

-----  
Beyeranyl cation in the complex

(d)

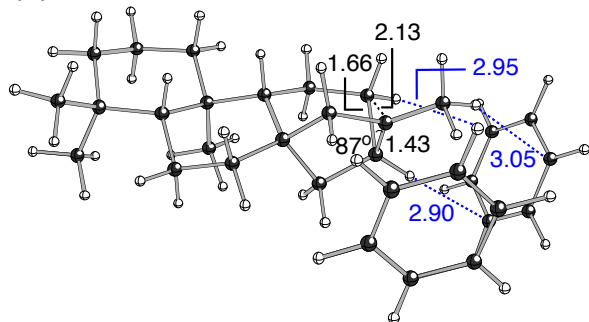

B3LYP/6-31+G(d,p)//B3LYP/6-31+G(d,p):

HF = -1246.3451465 hartrees (-782094.042880215 kcal/mol)

Imaginary Frequencies: 1 (-8.2328 1/cm)

Zero-point correction = 0.693656 (Hartree/Particle)

Counterpoise: BSSE energy = 0.001520014992 hartrees

Coordinates (from last standard orientation):

-----  
Center Atomic Coordinates (Angstroms)

| Number | Number | X         | Y         | Z         |
|--------|--------|-----------|-----------|-----------|
| 1      | 6      | -5.296152 | 0.515776  | 0.219105  |
| 2      | 6      | -3.733962 | 0.485877  | 0.028860  |
| 3      | 6      | -3.038034 | -0.914585 | -0.099044 |
| 4      | 6      | -3.825856 | -1.781449 | -1.119499 |
| 5      | 6      | -5.330349 | -1.849125 | -0.828404 |
| 6      | 6      | -5.944876 | -0.447313 | -0.807118 |
| 7      | 1      | -3.592623 | 0.954127  | -0.960279 |
| 8      | 1      | -3.691156 | -1.356513 | -2.125362 |
| 9      | 1      | -3.410421 | -2.796282 | -1.150506 |
| 10     | 1      | -5.818984 | -2.454021 | -1.600954 |
| 11     | 1      | -5.515635 | -2.369154 | 0.119224  |
| 12     | 1      | -5.841720 | -0.009396 | -1.810885 |
| 13     | 1      | -7.022288 | -0.506095 | -0.609432 |
| 14     | 6      | -1.592958 | -0.664863 | -0.701292 |
| 15     | 6      | -2.951676 | 1.355538  | 1.027923  |
| 16     | 1      | -3.465179 | 2.305267  | 1.202718  |
| 17     | 1      | -2.881704 | 0.866806  | 2.005106  |
| 18     | 6      | -1.563333 | 1.668089  | 0.468759  |
| 19     | 6      | -0.729663 | 0.458377  | -0.016140 |
| 20     | 6      | -5.784992 | 0.182652  | 1.648098  |
| 21     | 1      | -5.250508 | 0.761304  | 2.408463  |
| 22     | 1      | -6.846768 | 0.437155  | 1.737386  |
| 23     | 1      | -5.693797 | -0.874572 | 1.906236  |
| 24     | 6      | -5.801396 | 1.941614  | -0.109403 |
| 25     | 1      | -5.441564 | 2.281457  | -1.087796 |
| 26     | 1      | -6.896178 | 1.950840  | -0.140099 |
| 27     | 1      | -5.496583 | 2.678589  | 0.640539  |
| 28     | 6      | -2.986782 | -1.670441 | 1.252170  |
| 29     | 1      | -3.979776 | -1.755306 | 1.688669  |
| 30     | 1      | -2.622032 | -2.694281 | 1.127644  |
| 31     | 1      | -2.359629 | -1.181241 | 2.001143  |
| 32     | 6      | 0.334107  | 1.015954  | -1.025339 |
| 33     | 1      | 0.680988  | 2.011581  | -0.689776 |
| 34     | 1      | -1.779511 | -0.317910 | -1.727749 |
| 35     | 6      | -0.775178 | -1.984924 | -0.785785 |
| 36     | 1      | -0.915243 | -2.569083 | 0.125485  |
| 37     | 6      | 0.727675  | -1.797482 | -0.975157 |
| 38     | 6      | 1.545299  | 0.168985  | -0.900092 |
| 39     | 6      | 2.776915  | 0.339477  | -1.690854 |
| 40     | 1      | 3.288422  | 1.206217  | -1.235373 |
| 41     | 1      | 3.451786  | -0.515887 | -1.614784 |
| 42     | 1      | 2.578984  | 0.607188  | -2.732068 |

|    |   |           |           |           |
|----|---|-----------|-----------|-----------|
| 43 | 6 | 1.340185  | -0.763837 | 0.166350  |
| 44 | 6 | 0.209594  | -0.195454 | 1.038752  |
| 45 | 1 | -1.710117 | 2.332887  | -0.393761 |
| 46 | 1 | -0.965517 | 2.239178  | 1.191568  |
| 47 | 1 | -1.140264 | -2.605902 | -1.609368 |
| 48 | 1 | 1.324800  | -2.701451 | -0.829380 |
| 49 | 1 | 0.939942  | -1.489378 | -2.010053 |
| 50 | 1 | -0.267469 | -0.957308 | 1.654896  |
| 51 | 1 | 2.206211  | -1.223468 | 0.640281  |
| 52 | 1 | -0.012138 | 1.153622  | -2.055951 |
| 53 | 1 | 0.637200  | 0.555909  | 1.712889  |
| 54 | 6 | 4.250784  | -2.921731 | 1.797680  |
| 55 | 6 | 3.546053  | -3.951736 | 1.162854  |
| 56 | 6 | 3.771773  | -4.223433 | -0.191417 |
| 57 | 6 | 4.702096  | -3.465138 | -0.912037 |
| 58 | 6 | 5.407025  | -2.436271 | -0.276900 |
| 59 | 6 | 5.181820  | -2.164756 | 1.077836  |
| 60 | 1 | 4.094403  | -2.728278 | 2.855177  |
| 61 | 1 | 2.844378  | -4.557936 | 1.729097  |
| 62 | 1 | 3.247309  | -5.042454 | -0.676023 |
| 63 | 1 | 4.897393  | -3.694206 | -1.955937 |
| 64 | 1 | 6.151456  | -1.867868 | -0.827703 |
| 65 | 1 | 5.747671  | -1.382879 | 1.576326  |
| 66 | 6 | 4.369324  | 3.213545  | 0.885773  |
| 67 | 6 | 4.641236  | 3.505885  | -0.455991 |
| 68 | 6 | 3.694742  | 4.189506  | -1.228733 |
| 69 | 6 | 2.478895  | 4.584438  | -0.658347 |
| 70 | 6 | 2.209388  | 4.294722  | 0.684114  |
| 71 | 6 | 3.153460  | 3.607146  | 1.455563  |
| 72 | 1 | 5.113119  | 2.704244  | 1.491931  |
| 73 | 1 | 5.597222  | 3.226690  | -0.890232 |
| 74 | 1 | 3.914106  | 4.435594  | -2.263826 |
| 75 | 1 | 1.757394  | 5.140364  | -1.250518 |
| 76 | 1 | 1.279258  | 4.628727  | 1.135625  |
| 77 | 1 | 2.953778  | 3.402847  | 2.503710  |

---

Kauranyl cation in the complex

(e)

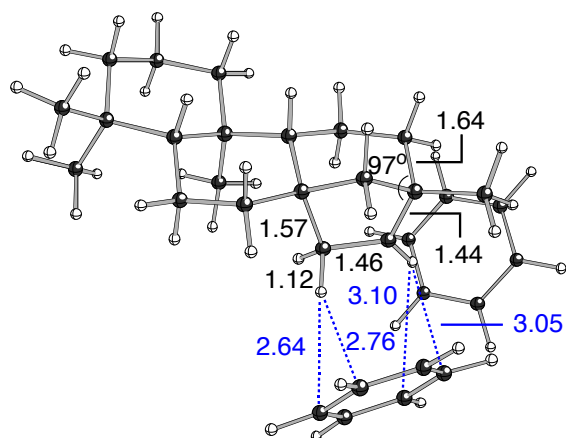

B3LYP/6-31+G(d,p)//B3LYP/6-31+G(d,p):  
HF = -1246.339557 hartrees (-782090.53541307 kcal/mol)  
Imaginary Frequencies: none found  
Zero-point correction = 0.693741 (Hartree/Particle)  
Counterpoise: BSSE energy = 0.001971380641 hartrees

Coordinates (from last standard orientation):

| Center Number | Atomic Number | Coordinates (Angstroms) |           |           |
|---------------|---------------|-------------------------|-----------|-----------|
|               |               | X                       | Y         | Z         |
| 1             | 6             | 4.945783                | 0.211433  | -0.471663 |
| 2             | 6             | 3.510635                | 0.346268  | 0.151072  |
| 3             | 6             | 2.529177                | -0.870744 | -0.018545 |
| 4             | 6             | 3.268779                | -2.171588 | 0.401118  |
| 5             | 6             | 4.628177                | -2.353338 | -0.287511 |
| 6             | 6             | 5.544229                | -1.151980 | -0.039062 |
| 7             | 1             | 3.708034                | 0.379484  | 1.235610  |
| 8             | 1             | 3.433386                | -2.149379 | 1.488505  |
| 9             | 1             | 2.638120                | -3.045628 | 0.197306  |
| 10            | 1             | 5.103352                | -3.263812 | 0.095510  |
| 11            | 1             | 4.495392                | -2.519089 | -1.363306 |
| 12            | 1             | 5.770157                | -1.105003 | 1.036263  |
| 13            | 1             | 6.506012                | -1.297929 | -0.546223 |
| 14            | 6             | 1.347080                | -0.634765 | 1.003869  |
| 15            | 6             | 2.791668                | 1.666301  | -0.182628 |
| 16            | 1             | 3.484772                | 2.508656  | -0.107992 |
| 17            | 1             | 2.429720                | 1.669655  | -1.217164 |
| 18            | 6             | 1.638336                | 1.915206  | 0.793750  |
| 19            | 6             | 0.634791                | 0.755749  | 0.926213  |
| 20            | 6             | 4.996557                | 0.363841  | -2.008907 |
| 21            | 1             | 4.514081                | 1.289531  | -2.340308 |

|    |   |           |           |           |
|----|---|-----------|-----------|-----------|
| 22 | 1 | 6.040910  | 0.411048  | -2.335923 |
| 23 | 1 | 4.531915  | -0.465067 | -2.546078 |
| 24 | 6 | 5.855066  | 1.313184  | 0.124580  |
| 25 | 1 | 5.805793  | 1.327350  | 1.219745  |
| 26 | 1 | 6.897390  | 1.127219  | -0.156091 |
| 27 | 1 | 5.599797  | 2.312885  | -0.240635 |
| 28 | 6 | 2.023066  | -1.047453 | -1.471249 |
| 29 | 1 | 2.811848  | -1.429616 | -2.118053 |
| 30 | 1 | 1.210313  | -1.777949 | -1.526871 |
| 31 | 1 | 1.673667  | -0.118056 | -1.927666 |
| 32 | 6 | -0.244709 | 0.945493  | 2.190770  |
| 33 | 1 | -0.557759 | 1.992605  | 2.287919  |
| 34 | 1 | 1.829621  | -0.642012 | 1.992592  |
| 35 | 6 | 0.291296  | -1.768181 | 1.018515  |
| 36 | 1 | -0.065243 | -1.971670 | 0.003390  |
| 37 | 6 | -0.918123 | -1.480560 | 1.917895  |
| 38 | 6 | -1.475624 | 0.062792  | 1.914231  |
| 39 | 6 | -2.683082 | 0.164952  | 2.839889  |
| 40 | 1 | -3.048540 | 1.195138  | 2.868880  |
| 41 | 1 | -3.499664 | -0.484924 | 2.511995  |
| 42 | 1 | -2.401810 | -0.123659 | 3.856511  |
| 43 | 6 | -1.659596 | 0.165357  | 0.487842  |
| 44 | 6 | -0.491999 | 0.733648  | -0.170687 |
| 45 | 1 | 2.071630  | 2.083922  | 1.789063  |
| 46 | 1 | 1.097629  | 2.835715  | 0.538381  |
| 47 | 1 | 0.744506  | -2.700441 | 1.366627  |
| 48 | 1 | -1.747843 | -2.158092 | 1.705084  |
| 49 | 1 | -0.654144 | -1.576897 | 2.977981  |
| 50 | 1 | -0.276848 | 0.304453  | -1.151597 |
| 51 | 1 | -2.520881 | -0.244455 | -0.040612 |
| 52 | 1 | 0.270501  | 0.663513  | 3.113402  |
| 53 | 1 | -0.803500 | 1.785414  | -0.374511 |
| 54 | 6 | -2.623972 | 3.054162  | -2.062777 |
| 55 | 6 | -3.607070 | 2.315901  | -1.399790 |
| 56 | 6 | -3.826695 | 2.512460  | -0.028462 |
| 57 | 6 | -3.071334 | 3.461909  | 0.674459  |
| 58 | 6 | -2.086483 | 4.198970  | 0.011348  |
| 59 | 6 | -1.858773 | 3.991139  | -1.355765 |
| 60 | 1 | -2.462400 | 2.914511  | -3.127449 |
| 61 | 1 | -4.215473 | 1.603954  | -1.949183 |
| 62 | 1 | -4.616829 | 1.964572  | 0.477406  |
| 63 | 1 | -3.269651 | 3.644488  | 1.726668  |
| 64 | 1 | -1.511488 | 4.947083  | 0.548926  |
| 65 | 1 | -1.105347 | 4.576985  | -1.874038 |



|    |   |           |           |           |
|----|---|-----------|-----------|-----------|
| 66 | 6 | -4.816940 | -1.687642 | -1.288740 |
| 67 | 6 | -3.728143 | -2.039692 | -2.095109 |
| 68 | 6 | -2.876889 | -3.080092 | -1.705277 |
| 69 | 6 | -3.115264 | -3.768314 | -0.510150 |
| 70 | 6 | -4.202716 | -3.414686 | 0.296856  |
| 71 | 6 | -5.053281 | -2.373735 | -0.091846 |
| 72 | 1 | -5.498549 | -0.903446 | -1.606438 |
| 73 | 1 | -3.560828 | -1.526836 | -3.038215 |
| 74 | 1 | -2.049102 | -3.372737 | -2.345060 |
| 75 | 1 | -2.471123 | -4.594333 | -0.222025 |
| 76 | 1 | -4.402141 | -3.965729 | 1.211596  |
| 77 | 1 | -5.913069 | -2.117409 | 0.520647  |

---

Beyeranyl cation in the complex

**Figure 3**

(a)

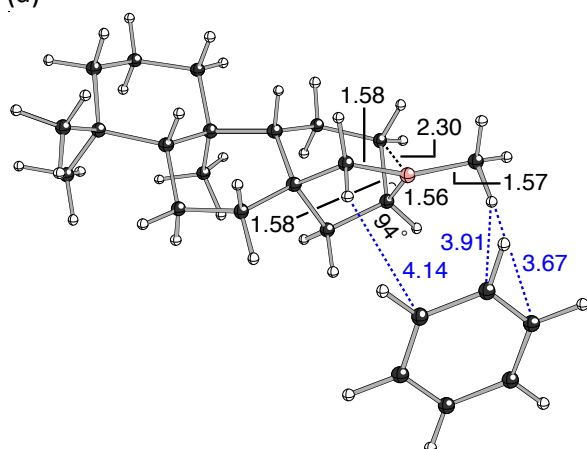

B3LYP/6-31+G(d,p)//B3LYP/6-31+G(d,p):

HF = -1001.0881661 hartrees (-628192.835109411 kcal/mol)

Imaginary Frequencies: none found

Zero-point correction = 0.588184 (Hartree/Particle)

Counterpoise: BSSE energy = 0.000519842077 hartrees

Coordinates (from last standard orientation):

---

| Center<br>Number | Atomic<br>Number | Coordinates (Angstroms) |           |           |
|------------------|------------------|-------------------------|-----------|-----------|
|                  |                  | X                       | Y         | Z         |
| 1                | 6                | 4.054627                | -1.772258 | -0.219598 |

---

|    |   |           |           |           |
|----|---|-----------|-----------|-----------|
| 2  | 6 | 2.704459  | -0.962811 | -0.166523 |
| 3  | 6 | 2.772121  | 0.572300  | 0.139831  |
| 4  | 6 | 3.885034  | 1.208662  | -0.736731 |
| 5  | 6 | 5.234913  | 0.489719  | -0.627670 |
| 6  | 6 | 5.098067  | -0.977145 | -1.044530 |
| 7  | 1 | 2.336624  | -1.016941 | -1.205005 |
| 8  | 1 | 3.566111  | 1.178787  | -1.789303 |
| 9  | 1 | 4.005216  | 2.267169  | -0.478150 |
| 10 | 1 | 5.969107  | 0.988804  | -1.272758 |
| 11 | 1 | 5.629917  | 0.567036  | 0.393374  |
| 12 | 1 | 4.801310  | -1.005912 | -2.103500 |
| 13 | 1 | 6.068111  | -1.489109 | -0.983902 |
| 14 | 6 | 1.385133  | 1.217477  | -0.290526 |
| 15 | 6 | 1.610286  | -1.597672 | 0.707059  |
| 16 | 1 | 1.614484  | -2.689041 | 0.611602  |
| 17 | 1 | 1.788530  | -1.386407 | 1.767271  |
| 18 | 6 | 0.243858  | -1.080379 | 0.255618  |
| 19 | 6 | 0.063955  | 0.456012  | 0.137705  |
| 20 | 6 | 4.647541  | -2.143979 | 1.160045  |
| 21 | 1 | 3.897163  | -2.598048 | 1.815318  |
| 22 | 1 | 5.452037  | -2.877243 | 1.026420  |
| 23 | 1 | 5.080377  | -1.291772 | 1.688728  |
| 24 | 6 | 3.795979  | -3.101771 | -0.969249 |
| 25 | 1 | 3.327476  | -2.923739 | -1.944339 |
| 26 | 1 | 4.742875  | -3.626015 | -1.145228 |
| 27 | 1 | 3.149644  | -3.780455 | -0.403087 |
| 28 | 6 | 3.102614  | 0.850987  | 1.630455  |
| 29 | 1 | 3.929246  | 0.235563  | 1.982792  |
| 30 | 1 | 3.403382  | 1.892070  | 1.779946  |
| 31 | 1 | 2.257132  | 0.657432  | 2.294110  |
| 32 | 6 | -1.079019 | 0.710813  | -0.913021 |
| 33 | 1 | -1.815991 | -0.108188 | -0.825631 |
| 34 | 1 | 1.399913  | 1.188147  | -1.389865 |
| 35 | 6 | 1.318254  | 2.712185  | 0.138436  |
| 36 | 1 | 1.686392  | 2.812700  | 1.162619  |
| 37 | 6 | -0.082084 | 3.335347  | 0.110171  |
| 38 | 6 | -3.094059 | 2.679546  | -1.176762 |
| 39 | 1 | -3.994275 | 2.148024  | -0.828559 |
| 40 | 1 | -3.237237 | 3.733028  | -0.909598 |
| 41 | 1 | -3.087627 | 2.587164  | -2.269180 |
| 42 | 6 | -1.158098 | 2.446922  | 0.859909  |
| 43 | 6 | -0.518571 | 1.148492  | 1.405656  |
| 44 | 1 | 0.062571  | -1.512333 | -0.738444 |
| 45 | 1 | -0.554421 | -1.473098 | 0.900326  |

|    |   |           |           |           |
|----|---|-----------|-----------|-----------|
| 46 | 1 | 1.991987  | 3.309724  | -0.485707 |
| 47 | 1 | -0.058537 | 4.335598  | 0.556077  |
| 48 | 1 | -0.371996 | 3.509741  | -0.942444 |
| 49 | 1 | 0.226471  | 1.317019  | 2.191063  |
| 50 | 1 | -1.692023 | 3.035229  | 1.611282  |
| 51 | 1 | -0.726502 | 0.666402  | -1.951906 |
| 52 | 1 | -1.302629 | 0.518184  | 1.847043  |
| 53 | 5 | -1.865932 | 2.005062  | -0.462498 |
| 54 | 6 | -6.099013 | -1.103239 | -1.378325 |
| 55 | 6 | -6.761517 | -0.243762 | -0.496223 |
| 56 | 6 | -6.712600 | -0.481982 | 0.881005  |
| 57 | 6 | -6.001900 | -1.579929 | 1.375990  |
| 58 | 6 | -5.339992 | -2.439670 | 0.493723  |
| 59 | 6 | -5.388161 | -2.201051 | -0.883324 |
| 60 | 1 | -6.136637 | -0.918010 | -2.448144 |
| 61 | 1 | -7.314962 | 0.608380  | -0.880853 |
| 62 | 1 | -7.227439 | 0.185616  | 1.566287  |
| 63 | 1 | -5.964436 | -1.765378 | 2.445814  |
| 64 | 1 | -4.788785 | -3.293399 | 0.877994  |
| 65 | 1 | -4.873883 | -2.868938 | -1.568705 |

-----  
Boro-kauraryl cation

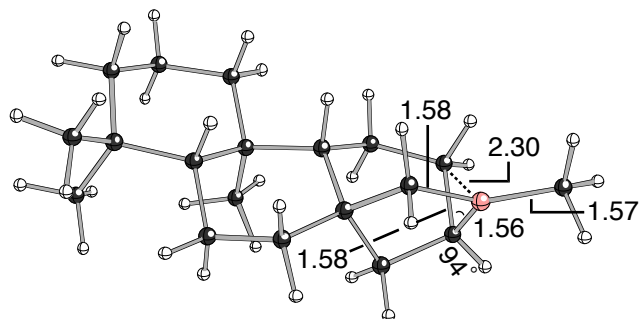

B3LYP/6-31+G(d,p)//B3LYP/6-31+G(d,p):

HF = -768.8192074 hartrees (-482441.740835574 kcal/mol)

Imaginary Frequencies: none found

Zero-point correction = 0.487198 (Hartree/Particle)

Coordinates (from last standard orientation):

-----

| Center Number | Atomic Number | Coordinates (Angstroms) |           |           |
|---------------|---------------|-------------------------|-----------|-----------|
|               |               | X                       | Y         | Z         |
| 1             | 6             | 3.154831                | -0.574232 | -0.203789 |
| 2             | 6             | 1.580621                | -0.595614 | -0.156376 |

-----

|    |   |           |           |           |
|----|---|-----------|-----------|-----------|
| 3  | 6 | 0.830462  | 0.752147  | 0.118742  |
| 4  | 6 | 1.442267  | 1.858053  | -0.784120 |
| 5  | 6 | 2.968872  | 1.958065  | -0.681051 |
| 6  | 6 | 3.623488  | 0.627601  | -1.062500 |
| 7  | 1 | 1.301643  | -0.856514 | -1.191139 |
| 8  | 1 | 1.184605  | 1.641795  | -1.831491 |
| 9  | 1 | 0.989610  | 2.827881  | -0.546421 |
| 10 | 1 | 3.329352  | 2.750456  | -1.349215 |
| 11 | 1 | 3.266784  | 2.260128  | 0.331149  |
| 12 | 1 | 3.384149  | 0.417664  | -2.115745 |
| 13 | 1 | 4.717827  | 0.704273  | -1.005781 |
| 14 | 6 | -0.688810 | 0.563077  | -0.307247 |
| 15 | 6 | 0.978436  | -1.693916 | 0.735452  |
| 16 | 1 | 1.555945  | -2.621853 | 0.663285  |
| 17 | 1 | 1.007661  | -1.398806 | 1.789955  |
| 18 | 6 | -0.452720 | -1.980801 | 0.279061  |
| 19 | 6 | -1.412630 | -0.769957 | 0.145802  |
| 20 | 6 | 3.852020  | -0.537805 | 1.176811  |
| 21 | 1 | 3.441033  | -1.288190 | 1.859778  |
| 22 | 1 | 4.919188  | -0.758065 | 1.053243  |
| 23 | 1 | 3.785745  | 0.434540  | 1.670101  |
| 24 | 6 | 3.639370  | -1.861010 | -0.914789 |
| 25 | 1 | 3.145794  | -1.992123 | -1.884922 |
| 26 | 1 | 4.719402  | -1.806973 | -1.095877 |
| 27 | 1 | 3.455577  | -2.760359 | -0.318235 |
| 28 | 6 | 0.967070  | 1.196294  | 1.599852  |
| 29 | 1 | 1.995697  | 1.121215  | 1.949864  |
| 30 | 1 | 0.669930  | 2.241207  | 1.728130  |
| 31 | 1 | 0.356461  | 0.596535  | 2.278441  |
| 32 | 6 | -2.524520 | -1.168157 | -0.893214 |
| 33 | 1 | -2.715588 | -2.252640 | -0.795822 |
| 34 | 1 | -0.660046 | 0.524763  | -1.405952 |
| 35 | 6 | -1.530925 | 1.807850  | 0.097110  |
| 36 | 1 | -1.263017 | 2.111682  | 1.111954  |
| 37 | 6 | -3.049845 | 1.600872  | 0.084454  |
| 38 | 6 | -5.279875 | -0.567046 | -1.140707 |
| 39 | 1 | -5.791698 | -1.449001 | -0.722658 |
| 40 | 1 | -5.931594 | 0.287771  | -0.924867 |
| 41 | 1 | -5.240190 | -0.717903 | -2.225651 |
| 42 | 6 | -3.493793 | 0.294953  | 0.863410  |
| 43 | 6 | -2.264487 | -0.465582 | 1.414175  |
| 44 | 1 | -0.374453 | -2.453730 | -0.709805 |
| 45 | 1 | -0.927105 | -2.727943 | 0.930442  |
| 46 | 1 | -1.277016 | 2.655622  | -0.548908 |

|    |   |           |           |           |
|----|---|-----------|-----------|-----------|
| 47 | 1 | -3.553082 | 2.472811  | 0.516007  |
| 48 | 1 | -3.395971 | 1.575880  | -0.965567 |
| 49 | 1 | -1.713490 | 0.081622  | 2.187276  |
| 50 | 1 | -4.251022 | 0.530950  | 1.616055  |
| 51 | 1 | -2.209938 | -1.029287 | -1.935911 |
| 52 | 1 | -2.597677 | -1.406310 | 1.873894  |
| 53 | 5 | -3.872700 | -0.477172 | -0.442414 |

---

(b)

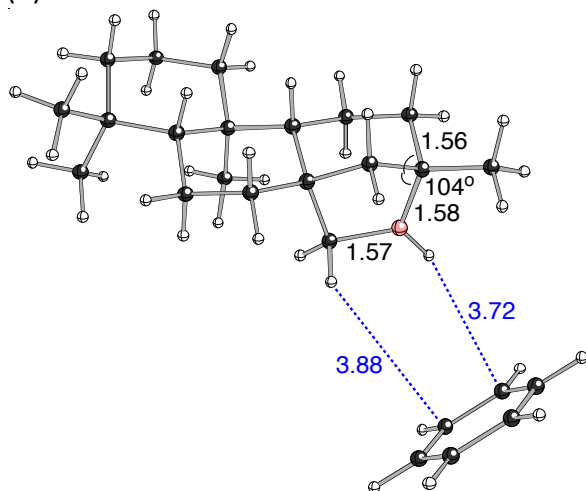

B3LYP/6-31+G(d,p)//B3LYP/6-31+G(d,p):  
HF = -1001.085153 hartrees (-628190.94435903 kcal/mol)  
Imaginary Frequencies: none found  
Zero-point correction = 0.587686 (Hartree/Particle)  
Counterpoise: BSSE energy = 0.000446883545 hartrees

Coordinates (from last standard orientation):

---

| Center Number | Atomic Number | Coordinates (Angstroms) |           |           |
|---------------|---------------|-------------------------|-----------|-----------|
|               |               | X                       | Y         | Z         |
| 1             | 6             | 4.294735                | -1.411743 | -0.271660 |
| 2             | 6             | 2.896236                | -0.731878 | -0.491614 |
| 3             | 6             | 2.516916                | 0.465441  | 0.455643  |
| 4             | 6             | 3.699126                | 1.475049  | 0.462299  |
| 5             | 6             | 5.059762                | 0.833307  | 0.766661  |
| 6             | 6             | 5.376084                | -0.302796 | -0.209574 |
| 7             | 1             | 2.999322                | -0.259216 | -1.482925 |
| 8             | 1             | 3.756283                | 1.957679  | -0.524742 |
| 9             | 1             | 3.506145                | 2.273916  | 1.188007  |

|    |   |           |           |           |
|----|---|-----------|-----------|-----------|
| 10 | 1 | 5.842872  | 1.599522  | 0.703988  |
| 11 | 1 | 5.087958  | 0.464723  | 1.799566  |
| 12 | 1 | 5.484190  | 0.126624  | -1.216770 |
| 13 | 1 | 6.345273  | -0.758026 | 0.035336  |
| 14 | 6 | 1.263802  | 1.175401  | -0.199501 |
| 15 | 6 | 1.715628  | -1.712834 | -0.623000 |
| 16 | 1 | 1.997469  | -2.570957 | -1.241715 |
| 17 | 1 | 1.436850  | -2.124610 | 0.354431  |
| 18 | 6 | 0.511921  | -1.018994 | -1.268739 |
| 19 | 6 | 0.041387  | 0.251714  | -0.539405 |
| 20 | 6 | 4.374793  | -2.322089 | 0.974122  |
| 21 | 1 | 3.576494  | -3.071905 | 0.970909  |
| 22 | 1 | 5.329597  | -2.861666 | 0.976273  |
| 23 | 1 | 4.310270  | -1.773894 | 1.915424  |
| 24 | 6 | 4.628370  | -2.294178 | -1.499128 |
| 25 | 1 | 4.501419  | -1.739517 | -2.436490 |
| 26 | 1 | 5.671930  | -2.627003 | -1.448440 |
| 27 | 1 | 4.005518  | -3.192626 | -1.550892 |
| 28 | 6 | 2.247479  | 0.034358  | 1.918741  |
| 29 | 1 | 3.176321  | -0.171809 | 2.452927  |
| 30 | 1 | 1.742974  | 0.830036  | 2.473906  |
| 31 | 1 | 1.630137  | -0.862335 | 1.995843  |
| 32 | 6 | -0.924874 | 1.067969  | -1.439070 |
| 33 | 1 | -1.697500 | 0.397818  | -1.844387 |
| 34 | 1 | 1.634403  | 1.515331  | -1.180321 |
| 35 | 6 | 0.789757  | 2.450063  | 0.539141  |
| 36 | 1 | 0.529454  | 2.208948  | 1.578530  |
| 37 | 6 | -0.424909 | 3.124455  | -0.133976 |
| 38 | 6 | -1.562696 | 2.120330  | -0.499223 |
| 39 | 6 | -2.765207 | 2.857356  | -1.095573 |
| 40 | 1 | -3.561710 | 2.158998  | -1.378703 |
| 41 | 1 | -3.189697 | 3.571800  | -0.379972 |
| 42 | 1 | -2.482854 | 3.418571  | -1.997467 |
| 43 | 6 | -0.874500 | -0.013652 | 0.702185  |
| 44 | 1 | 0.791407  | -0.745552 | -2.297499 |
| 45 | 1 | -0.332867 | -1.715698 | -1.355786 |
| 46 | 1 | 1.605830  | 3.177251  | 0.600387  |
| 47 | 1 | -0.810915 | 3.916036  | 0.521267  |
| 48 | 1 | -0.105042 | 3.616362  | -1.065918 |
| 49 | 1 | -0.380578 | -0.367184 | 1.610033  |
| 50 | 1 | -2.455855 | 1.577430  | 1.752333  |
| 51 | 1 | -0.409446 | 1.521680  | -2.298143 |
| 52 | 1 | -1.590357 | -0.812814 | 0.428111  |
| 53 | 6 | -5.262302 | -1.306508 | 1.567656  |

|    |   |           |           |           |
|----|---|-----------|-----------|-----------|
| 54 | 6 | -5.722697 | -0.073764 | 1.094149  |
| 55 | 6 | -6.324668 | 0.010654  | -0.165380 |
| 56 | 6 | -6.465558 | -1.137420 | -0.951384 |
| 57 | 6 | -6.005292 | -2.370035 | -0.477796 |
| 58 | 6 | -5.403772 | -2.454663 | 0.781951  |
| 59 | 1 | -4.794861 | -1.371464 | 2.546173  |
| 60 | 1 | -5.611140 | 0.817900  | 1.704320  |
| 61 | 1 | -6.683539 | 0.968064  | -0.532624 |
| 62 | 1 | -6.933689 | -1.071876 | -1.929612 |
| 63 | 1 | -6.115823 | -3.262018 | -1.088112 |
| 64 | 1 | -5.047409 | -3.412545 | 1.150585  |
| 65 | 5 | -1.767196 | 1.272155  | 0.821404  |

Boro-beyerayl cation

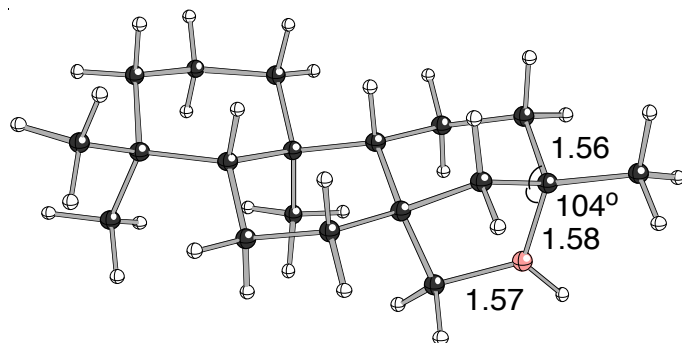

B3LYP/6-31+G(d,p)//B3LYP/6-31+G(d,p):

HF = -768.8161647 hartrees (-482439.831510897 kcal/mol)

Imaginary Frequencies: none found

Zero-point correction = 0.486557 (Hartree/Particle)

Coordinates (from last standard orientation):

| Center Number | Atomic Number | Coordinates (Angstroms) |           |           |
|---------------|---------------|-------------------------|-----------|-----------|
|               |               | X                       | Y         | Z         |
| 1             | 6             | 3.162492                | -0.443641 | -0.215198 |
| 2             | 6             | 1.597948                | -0.535832 | -0.311012 |
| 3             | 6             | 0.767057                | 0.685698  | 0.231777  |
| 4             | 6             | 1.347636                | 1.986111  | -0.391710 |
| 5             | 6             | 2.866970                | 2.128608  | -0.225959 |
| 6             | 6             | 3.611071                | 0.920293  | -0.800090 |
| 7             | 1             | 1.410748                | -0.518646 | -1.398128 |
| 8             | 1             | 1.112449                | 1.997523  | -1.466485 |

|    |   |           |           |           |
|----|---|-----------|-----------|-----------|
| 9  | 1 | 0.854207  | 2.863071  | 0.043561  |
| 10 | 1 | 3.201325  | 3.041515  | -0.734936 |
| 11 | 1 | 3.126058  | 2.267322  | 0.831026  |
| 12 | 1 | 3.447017  | 0.897695  | -1.887770 |
| 13 | 1 | 4.693918  | 1.034965  | -0.655502 |
| 14 | 6 | -0.708417 | 0.496066  | -0.304309 |
| 15 | 6 | 0.997719  | -1.864076 | 0.188783  |
| 16 | 1 | 1.605403  | -2.709950 | -0.148553 |
| 17 | 1 | 1.000674  | -1.908334 | 1.284615  |
| 18 | 6 | -0.427987 | -2.041749 | -0.344924 |
| 19 | 6 | -1.385176 | -0.887151 | -0.002949 |
| 20 | 6 | 3.729397  | -0.637098 | 1.209330  |
| 21 | 1 | 3.362540  | -1.564289 | 1.662360  |
| 22 | 1 | 4.822948  | -0.706728 | 1.164789  |
| 23 | 1 | 3.484716  | 0.182415  | 1.887296  |
| 24 | 6 | 3.792583  | -1.541866 | -1.105427 |
| 25 | 1 | 3.366218  | -1.532418 | -2.115552 |
| 26 | 1 | 4.871923  | -1.373272 | -1.199102 |
| 27 | 1 | 3.657911  | -2.545577 | -0.690408 |
| 28 | 6 | 0.819346  | 0.829189  | 1.773722  |
| 29 | 1 | 1.767416  | 1.257741  | 2.102376  |
| 30 | 1 | 0.036415  | 1.503687  | 2.131397  |
| 31 | 1 | 0.700983  | -0.120627 | 2.298251  |
| 32 | 6 | -2.672890 | -0.975578 | -0.867357 |
| 33 | 1 | -3.071942 | -2.000123 | -0.820321 |
| 34 | 1 | -0.596797 | 0.515133  | -1.400407 |
| 35 | 6 | -1.670143 | 1.654936  | 0.046883  |
| 36 | 1 | -1.726872 | 1.779804  | 1.136234  |
| 37 | 6 | -3.097372 | 1.447461  | -0.503008 |
| 38 | 6 | -3.665605 | 0.020881  | -0.220067 |
| 39 | 6 | -5.105823 | -0.099037 | -0.726689 |
| 40 | 1 | -5.506682 | -1.106481 | -0.561412 |
| 41 | 1 | -5.769251 | 0.608372  | -0.215253 |
| 42 | 1 | -5.169359 | 0.105162  | -1.804762 |
| 43 | 6 | -1.997912 | -0.953840 | 1.435953  |
| 44 | 1 | -0.369921 | -2.132086 | -1.440214 |
| 45 | 1 | -0.859065 | -2.985228 | 0.016903  |
| 46 | 1 | -1.279499 | 2.601927  | -0.339029 |
| 47 | 1 | -3.763379 | 2.212893  | -0.084327 |
| 48 | 1 | -3.098124 | 1.593320  | -1.594411 |
| 49 | 1 | -1.345514 | -0.659607 | 2.261128  |
| 50 | 1 | -4.086409 | 0.115904  | 2.225911  |
| 51 | 1 | -2.479278 | -0.755499 | -1.927396 |
| 52 | 1 | -2.267164 | -2.008641 | 1.640948  |



53 5 -3.379798 -0.217441 1.318138

---

**Figure S1**

CAM-B3LYP

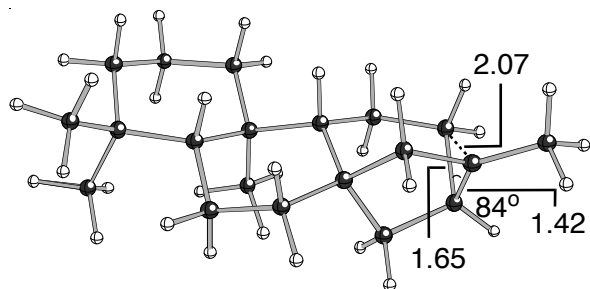

CAM-B3LYP/6-31+G(d,p)//CAM-B3LYP/6-31+G(d,p):  
HF = -781.3214671 hartrees (-490287.033819921 kcal/mol)  
Imaginary Frequencies: none found  
Zero-point correction = 0.497049 (Hartree/Particle)

Coordinates (from last standard orientation):

---

| Center Number | Atomic Number | Coordinates (Angstroms) |           |           |
|---------------|---------------|-------------------------|-----------|-----------|
|               |               | X                       | Y         | Z         |
| 1             | 6             | 3.156005                | -0.541910 | -0.205983 |
| 2             | 6             | 1.592489                | -0.584399 | -0.201391 |
| 3             | 6             | 0.830761                | 0.731462  | 0.146263  |
| 4             | 6             | 1.433875                | 1.897352  | -0.669605 |
| 5             | 6             | 2.952032                | 2.000400  | -0.540455 |
| 6             | 6             | 3.619559                | 0.704064  | -0.986798 |
| 7             | 1             | 1.341969                | -0.776402 | -1.257561 |
| 8             | 1             | 1.191036                | 1.751396  | -1.731493 |
| 9             | 1             | 0.973162                | 2.845091  | -0.369081 |
| 10            | 1             | 3.310359                | 2.831283  | -1.156258 |
| 11            | 1             | 3.234081                | 2.247882  | 0.488605  |
| 12            | 1             | 3.400794                | 0.550842  | -2.052621 |
| 13            | 1             | 4.709098                | 0.788239  | -0.907504 |
| 14            | 6             | -0.657256               | 0.544087  | -0.329353 |
| 15            | 6             | 0.991888                | -1.745508 | 0.597125  |
| 16            | 1             | 1.560934                | -2.663588 | 0.435118  |
| 17            | 1             | 1.036862                | -1.549166 | 1.672061  |
| 18            | 6             | -0.440989               | -1.997721 | 0.144184  |

|    |   |           |           |           |
|----|---|-----------|-----------|-----------|
| 19 | 6 | -1.372611 | -0.771872 | 0.119767  |
| 20 | 6 | 3.811221  | -0.566620 | 1.186981  |
| 21 | 1 | 3.396328  | -1.354160 | 1.822373  |
| 22 | 1 | 4.880501  | -0.771229 | 1.078507  |
| 23 | 1 | 3.728059  | 0.378367  | 1.725434  |
| 24 | 6 | 3.672864  | -1.776738 | -0.967476 |
| 25 | 1 | 3.194358  | -1.875035 | -1.947669 |
| 26 | 1 | 4.750059  | -1.685652 | -1.135319 |
| 27 | 1 | 3.514043  | -2.706845 | -0.415038 |
| 28 | 6 | 0.924821  | 1.082837  | 1.644715  |
| 29 | 1 | 1.960146  | 1.110329  | 1.973761  |
| 30 | 1 | 0.516256  | 2.074743  | 1.852567  |
| 31 | 1 | 0.416152  | 0.367710  | 2.292715  |
| 32 | 6 | -2.537239 | -1.109405 | -0.861736 |
| 33 | 1 | -2.802311 | -2.176605 | -0.762135 |
| 34 | 1 | -0.593046 | 0.494665  | -1.424820 |
| 35 | 6 | -1.527935 | 1.767562  | 0.039664  |
| 36 | 1 | -1.300027 | 2.100143  | 1.052761  |
| 37 | 6 | -3.026155 | 1.510223  | -0.026341 |
| 38 | 6 | -3.740760 | -0.400404 | -0.368542 |
| 39 | 6 | -5.064880 | -0.428286 | -1.019300 |
| 40 | 1 | -5.507755 | -1.395851 | -0.740871 |
| 41 | 1 | -5.733748 | 0.350310  | -0.649491 |
| 42 | 1 | -5.001874 | -0.406690 | -2.108857 |
| 43 | 6 | -3.427990 | 0.198487  | 0.884083  |
| 44 | 6 | -2.174285 | -0.495897 | 1.416429  |
| 45 | 1 | -0.386311 | -2.388755 | -0.879933 |
| 46 | 1 | -0.911848 | -2.786348 | 0.743897  |
| 47 | 1 | -1.303514 | 2.609383  | -0.619512 |
| 48 | 1 | -3.646911 | 2.309546  | 0.382513  |
| 49 | 1 | -3.337611 | 1.441937  | -1.080490 |
| 50 | 1 | -1.644955 | 0.104971  | 2.153744  |
| 51 | 1 | -4.235172 | 0.450436  | 1.568050  |
| 52 | 1 | -2.325371 | -0.949292 | -1.923304 |
| 53 | 1 | -2.476247 | -1.427941 | 1.906476  |

---

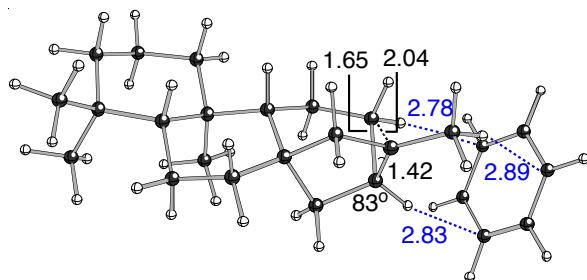

CAM-B3LYP/6-31+G(d,p)//CAM-B3LYP/6-31+G(d,p):  
HF = -1013.4544597 hartrees (-635952.808006347 kcal/mol)  
Imaginary Frequencies: none found  
Zero-point correction = 0.599674 (Hartree/Particle)  
Counterpoise: BSSE energy = 0.000773195875 hartrees

Coordinates (from last standard orientation):

| Center Number | Atomic Number | Coordinates (Angstroms) |           |           |
|---------------|---------------|-------------------------|-----------|-----------|
|               |               | X                       | Y         | Z         |
| 1             | 6             | -4.705934               | -0.080596 | 0.125883  |
| 2             | 6             | -3.220962               | 0.395155  | 0.007866  |
| 3             | 6             | -2.113793               | -0.697949 | -0.093075 |
| 4             | 6             | -2.531722               | -1.744104 | -1.151082 |
| 5             | 6             | -3.938417               | -2.297087 | -0.930687 |
| 6             | 6             | -4.966922               | -1.170818 | -0.932216 |
| 7             | 1             | -3.195687               | 0.903203  | -0.970075 |
| 8             | 1             | -2.501430               | -1.275599 | -2.144796 |
| 9             | 1             | -1.810289               | -2.568635 | -1.170432 |
| 10            | 1             | -4.173160               | -3.012014 | -1.725571 |
| 11            | 1             | -3.986116               | -2.864636 | 0.005075  |
| 12            | 1             | -4.965424               | -0.701663 | -1.925750 |
| 13            | 1             | -5.975319               | -1.573929 | -0.786335 |
| 14            | 6             | -0.810943               | 0.010573  | -0.618916 |
| 15            | 6             | -2.807625               | 1.445186  | 1.044118  |
| 16            | 1             | -3.603896               | 2.177813  | 1.193909  |
| 17            | 1             | -2.633457               | 0.986812  | 2.021944  |
| 18            | 6             | -1.570459               | 2.191156  | 0.559705  |
| 19            | 6             | -0.380562               | 1.319121  | 0.119874  |
| 20            | 6             | -5.117619               | -0.587431 | 1.520290  |
| 21            | 1             | -4.815233               | 0.102635  | 2.313167  |
| 22            | 1             | -6.207512               | -0.671980 | 1.565929  |
| 23            | 1             | -4.717675               | -1.573103 | 1.761512  |
| 24            | 6             | -5.625002               | 1.109368  | -0.208456 |
| 25            | 1             | -5.345447               | 1.579319  | -1.157290 |

|    |   |           |           |           |
|----|---|-----------|-----------|-----------|
| 26 | 1 | -6.659150 | 0.765166  | -0.303589 |
| 27 | 1 | -5.615194 | 1.877786  | 0.569278  |
| 28 | 6 | -1.884151 | -1.423807 | 1.247427  |
| 29 | 1 | -2.815069 | -1.829181 | 1.634313  |
| 30 | 1 | -1.208173 | -2.274657 | 1.132837  |
| 31 | 1 | -1.481418 | -0.778057 | 2.028849  |
| 32 | 6 | 0.502321  | 2.194795  | -0.820907 |
| 33 | 1 | 0.512551  | 3.234728  | -0.452861 |
| 34 | 1 | -1.056178 | 0.311202  | -1.646705 |
| 35 | 6 | 0.384075  | -0.968814 | -0.685557 |
| 36 | 1 | 0.410639  | -1.593241 | 0.208047  |
| 37 | 6 | 1.740537  | -0.290122 | -0.802244 |
| 38 | 6 | 1.903597  | 1.736451  | -0.646809 |
| 39 | 6 | 3.068962  | 2.280485  | -1.373789 |
| 40 | 1 | 3.303754  | 3.235317  | -0.882335 |
| 41 | 1 | 3.949842  | 1.642630  | -1.280559 |
| 42 | 1 | 2.847808  | 2.501618  | -2.419727 |
| 43 | 6 | 1.943393  | 0.803238  | 0.421329  |
| 44 | 6 | 0.651093  | 0.962637  | 1.218920  |
| 45 | 1 | -1.878372 | 2.788133  | -0.308437 |
| 46 | 1 | -1.222795 | 2.909561  | 1.312340  |
| 47 | 1 | 0.275256  | -1.647717 | -1.534624 |
| 48 | 1 | 2.607670  | -0.942882 | -0.684323 |
| 49 | 1 | 1.853427  | 0.123503  | -1.816447 |
| 50 | 1 | 0.403451  | 0.074216  | 1.797259  |
| 51 | 1 | 2.883559  | 0.604565  | 0.930232  |
| 52 | 1 | 0.172978  | 2.243812  | -1.863175 |
| 53 | 1 | 0.782790  | 1.789129  | 1.925943  |
| 54 | 6 | 5.298029  | -0.662224 | 1.701970  |
| 55 | 6 | 4.865141  | -1.848616 | 1.110542  |
| 56 | 6 | 5.105920  | -2.081551 | -0.242886 |
| 57 | 6 | 5.777546  | -1.127499 | -1.005757 |
| 58 | 6 | 6.209564  | 0.058693  | -0.414506 |
| 59 | 6 | 5.970726  | 0.291069  | 0.939420  |
| 60 | 1 | 5.137375  | -0.494531 | 2.762577  |
| 61 | 1 | 4.366120  | -2.603214 | 1.710766  |
| 62 | 1 | 4.795926  | -3.018296 | -0.695983 |
| 63 | 1 | 5.988012  | -1.320398 | -2.053107 |
| 64 | 1 | 6.761696  | 0.787038  | -1.000903 |
| 65 | 1 | 6.333380  | 1.201691  | 1.406298  |

---

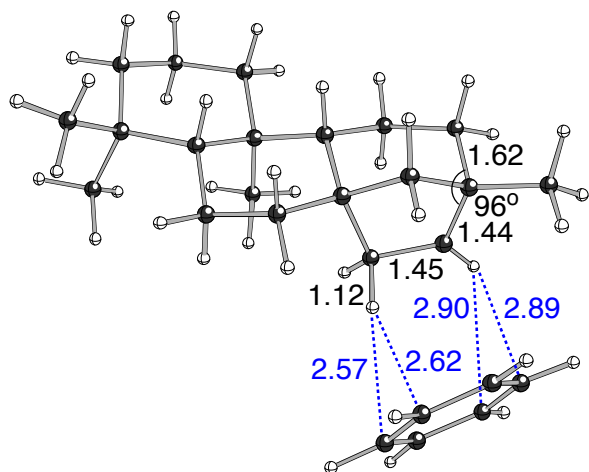

CAM-B3LYP/6-31+G(d,p)//CAM-B3LYP/6-31+G(d,p):  
HF = -1013.4486489 hartrees (-635949.161671239 kcal/mol)  
Imaginary Frequencies: none found  
Zero-point correction = 0.599260 (Hartree/Particle)  
Counterpoise: BSSE energy = 0.001031837406 hartrees

Coordinates (from last standard orientation):

| Center Number | Atomic Number | Coordinates (Angstroms) |           |           |
|---------------|---------------|-------------------------|-----------|-----------|
|               |               | X                       | Y         | Z         |
| 1             | 6             | 3.997250                | -1.087167 | -0.309531 |
| 2             | 6             | 2.572178                | -0.490174 | -0.536545 |
| 3             | 6             | 2.064417                | 0.570836  | 0.494168  |
| 4             | 6             | 3.159841                | 1.644317  | 0.687412  |
| 5             | 6             | 4.534656                | 1.059362  | 1.008908  |
| 6             | 6             | 4.981336                | 0.074895  | -0.065942 |
| 7             | 1             | 2.681705                | 0.077906  | -1.474257 |
| 8             | 1             | 3.243732                | 2.234613  | -0.235737 |
| 9             | 1             | 2.866784                | 2.341201  | 1.480495  |
| 10            | 1             | 5.260652                | 1.875013  | 1.085367  |
| 11            | 1             | 4.528181                | 0.577338  | 1.992378  |
| 12            | 1             | 5.108112                | 0.624046  | -1.009030 |
| 13            | 1             | 5.965718                | -0.337245 | 0.182370  |
| 14            | 6             | 0.820216                | 1.267239  | -0.163714 |
| 15            | 6             | 1.483694                | -1.535872 | -0.804900 |
| 16            | 1             | 1.853017                | -2.303725 | -1.487994 |
| 17            | 1             | 1.207786                | -2.062137 | 0.114598  |
| 18            | 6             | 0.260236                | -0.884157 | -1.440386 |
| 19            | 6             | -0.301874               | 0.317983  | -0.675136 |
| 20            | 6             | 4.084615                | -2.117658 | 0.829238  |

|    |   |           |           |           |
|----|---|-----------|-----------|-----------|
| 21 | 1 | 3.332204  | -2.904533 | 0.721160  |
| 22 | 1 | 5.064126  | -2.604561 | 0.803816  |
| 23 | 1 | 3.972252  | -1.681859 | 1.822306  |
| 24 | 6 | 4.449693  | -1.797856 | -1.598581 |
| 25 | 1 | 4.325906  | -1.155828 | -2.477116 |
| 26 | 1 | 5.510513  | -2.055840 | -1.526690 |
| 27 | 1 | 3.907262  | -2.730033 | -1.778123 |
| 28 | 6 | 1.737936  | -0.036578 | 1.872990  |
| 29 | 1 | 2.647796  | -0.310428 | 2.402364  |
| 30 | 1 | 1.223247  | 0.680615  | 2.517415  |
| 31 | 1 | 1.130767  | -0.941788 | 1.818808  |
| 32 | 6 | -1.270798 | 1.117005  | -1.573804 |
| 33 | 1 | -1.923812 | 0.436055  | -2.132279 |
| 34 | 1 | 1.215272  | 1.744926  | -1.071109 |
| 35 | 6 | 0.205419  | 2.388920  | 0.696206  |
| 36 | 1 | 0.001875  | 2.022942  | 1.707276  |
| 37 | 6 | -1.078234 | 2.979115  | 0.107896  |
| 38 | 6 | -2.104465 | 1.928760  | -0.577070 |
| 39 | 6 | -3.332684 | 2.668989  | -1.076399 |
| 40 | 1 | -4.019618 | 1.976423  | -1.567333 |
| 41 | 1 | -3.865609 | 3.168764  | -0.263086 |
| 42 | 1 | -3.039167 | 3.427641  | -1.805517 |
| 43 | 6 | -2.211264 | 1.056334  | 0.561602  |
| 44 | 6 | -1.272020 | -0.043953 | 0.495143  |
| 45 | 1 | 0.549001  | -0.526666 | -2.436817 |
| 46 | 1 | -0.538695 | -1.617715 | -1.602310 |
| 47 | 1 | 0.919068  | 3.206203  | 0.817867  |
| 48 | 1 | -1.613903 | 3.586716  | 0.840815  |
| 49 | 1 | -0.852818 | 3.618917  | -0.752011 |
| 50 | 1 | -0.863851 | -0.352500 | 1.458212  |
| 51 | 1 | -2.841460 | 1.269824  | 1.422263  |
| 52 | 1 | -0.753106 | 1.752803  | -2.296214 |
| 53 | 1 | -1.925872 | -0.886312 | 0.167358  |
| 54 | 6 | -3.974213 | -2.199854 | 1.565266  |
| 55 | 6 | -4.652087 | -0.984510 | 1.567674  |
| 56 | 6 | -4.978437 | -0.364502 | 0.358045  |
| 57 | 6 | -4.639076 | -0.971085 | -0.852489 |
| 58 | 6 | -3.960890 | -2.187267 | -0.854030 |
| 59 | 6 | -3.624124 | -2.798637 | 0.354461  |
| 60 | 1 | -3.734146 | -2.690978 | 2.502606  |
| 61 | 1 | -4.952038 | -0.531825 | 2.508016  |
| 62 | 1 | -5.544866 | 0.562192  | 0.360302  |
| 63 | 1 | -4.929007 | -0.510858 | -1.791947 |
| 64 | 1 | -3.713051 | -2.670785 | -1.793453 |

65 1 -3.111870 -3.755430 0.352355

---

Beyeranyl cation in the complex

CAM-B3LYP/6-31+G(d,p)//CAM-B3LYP/6-31+G(d,p):

HF = -781.3111152 hartrees (-490280.537899152 kcal/mol)

LC- $\omega$ PBE

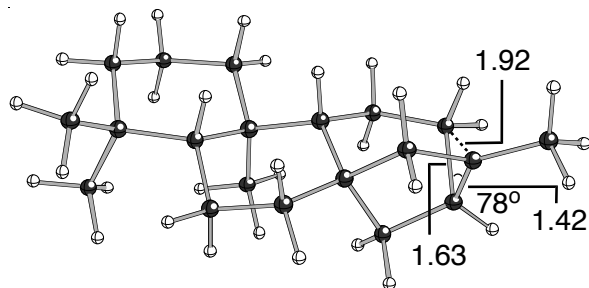

LC- $\omega$ PBE/6-31+G(d,p)//LC- $\omega$ PBE /6-31+G(d,p):

HF = -781.3247711 hartrees (-490289.107112961 kcal/mol)

Imaginary Frequencies: none found

Zero-point correction = 0.501630 (Hartree/Particle)

Coordinates (from last standard orientation):

---

| Center Number | Atomic Number | Coordinates (Angstroms) |           |           |
|---------------|---------------|-------------------------|-----------|-----------|
|               |               | X                       | Y         | Z         |
| 1             | 6             | 3.145259                | -0.520321 | -0.207098 |
| 2             | 6             | 1.590440                | -0.576100 | -0.216509 |
| 3             | 6             | 0.818988                | 0.718710  | 0.156069  |
| 4             | 6             | 1.411220                | 1.905450  | -0.626422 |
| 5             | 6             | 2.923814                | 2.016572  | -0.491318 |
| 6             | 6             | 3.598674                | 0.738061  | -0.962555 |
| 7             | 1             | 1.349497                | -0.742552 | -1.280139 |
| 8             | 1             | 1.171836                | 1.784770  | -1.692306 |
| 9             | 1             | 0.942628                | 2.841596  | -0.301521 |
| 10            | 1             | 3.277406                | 2.862091  | -1.088943 |
| 11            | 1             | 3.203785                | 2.245664  | 0.542340  |
| 12            | 1             | 3.380510                | 0.602271  | -2.030751 |
| 13            | 1             | 4.687475                | 0.828489  | -0.881755 |
| 14            | 6             | -0.651557               | 0.523218  | -0.339111 |
| 15            | 6             | 0.996969                | -1.758976 | 0.545868  |
| 16            | 1             | 1.571452                | -2.668273 | 0.355054  |

|    |   |           |           |           |
|----|---|-----------|-----------|-----------|
| 17 | 1 | 1.043646  | -1.595842 | 1.626285  |
| 18 | 6 | -0.431824 | -2.005126 | 0.089796  |
| 19 | 6 | -1.361512 | -0.785176 | 0.103417  |
| 20 | 6 | 3.789626  | -0.563969 | 1.184641  |
| 21 | 1 | 3.375229  | -1.364456 | 1.803599  |
| 22 | 1 | 4.859987  | -0.762639 | 1.078673  |
| 23 | 1 | 3.701173  | 0.371310  | 1.738712  |
| 24 | 6 | 3.678339  | -1.732707 | -0.984290 |
| 25 | 1 | 3.197146  | -1.828413 | -1.963063 |
| 26 | 1 | 4.752534  | -1.619475 | -1.156382 |
| 27 | 1 | 3.541254  | -2.671876 | -0.441927 |
| 28 | 6 | 0.903321  | 1.036902  | 1.655738  |
| 29 | 1 | 1.939140  | 1.149348  | 1.966182  |
| 30 | 1 | 0.416618  | 1.984389  | 1.900064  |
| 31 | 1 | 0.476298  | 0.262368  | 2.293793  |
| 32 | 6 | -2.535324 | -1.098355 | -0.860054 |
| 33 | 1 | -2.829029 | -2.153801 | -0.750347 |
| 34 | 1 | -0.569215 | 0.467405  | -1.434063 |
| 35 | 6 | -1.537586 | 1.733654  | 0.005052  |
| 36 | 1 | -1.320786 | 2.092731  | 1.012500  |
| 37 | 6 | -3.024617 | 1.426698  | -0.047699 |
| 38 | 6 | -3.711418 | -0.339651 | -0.354878 |
| 39 | 6 | -5.057345 | -0.359909 | -0.975731 |
| 40 | 1 | -5.492996 | -1.329985 | -0.709418 |
| 41 | 1 | -5.713860 | 0.413652  | -0.575263 |
| 42 | 1 | -5.018246 | -0.305820 | -2.064605 |
| 43 | 6 | -3.387576 | 0.177195  | 0.925097  |
| 44 | 6 | -2.129485 | -0.519659 | 1.414706  |
| 45 | 1 | -0.379861 | -2.364469 | -0.945988 |
| 46 | 1 | -0.897010 | -2.812894 | 0.667137  |
| 47 | 1 | -1.336990 | 2.566111  | -0.672805 |
| 48 | 1 | -3.691648 | 2.226233  | 0.278846  |
| 49 | 1 | -3.305276 | 1.296921  | -1.111841 |
| 50 | 1 | -1.580269 | 0.073867  | 2.144419  |
| 51 | 1 | -4.176130 | 0.447195  | 1.622972  |
| 52 | 1 | -2.320108 | -0.940882 | -1.920630 |
| 53 | 1 | -2.426630 | -1.454084 | 1.902855  |

---



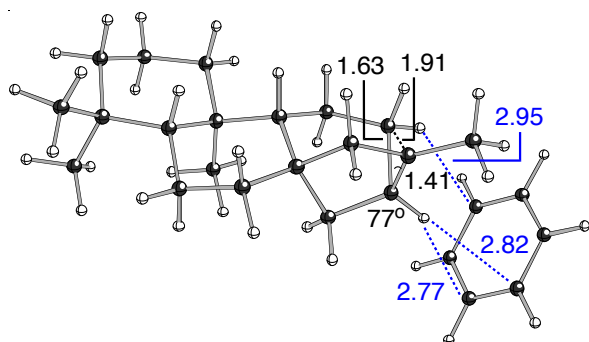

LC- $\omega$ PBE/6-31+G(d,p)//LC- $\omega$ PBE/6-31+G(d,p):

HF = -1013.4210794 hartrees (-635931.861534294 kcal/mol)

Imaginary Frequencies: none found

Zero-point correction = 0.605102 (Hartree/Particle)

Counterpoise: BSSE energy = 0.000665843963 hartrees

Coordinates (from last standard orientation):

| Center Number | Atomic Number | Coordinates (Angstroms) |           |           |
|---------------|---------------|-------------------------|-----------|-----------|
|               |               | X                       | Y         | Z         |
| 1             | 6             | -4.565489               | -0.100427 | 0.381257  |
| 2             | 6             | -3.100916               | 0.396377  | 0.211127  |
| 3             | 6             | -2.052495               | -0.615236 | -0.323268 |
| 4             | 6             | -2.623664               | -1.322642 | -1.566135 |
| 5             | 6             | -4.004800               | -1.920195 | -1.332798 |
| 6             | 6             | -4.986444               | -0.844542 | -0.894829 |
| 7             | 1             | -3.182185               | 1.154298  | -0.586513 |
| 8             | 1             | -2.700491               | -0.594737 | -2.386015 |
| 9             | 1             | -1.935185               | -2.106057 | -1.903342 |
| 10            | 1             | -4.357131               | -2.386126 | -2.257959 |
| 11            | 1             | -3.956096               | -2.726598 | -0.593267 |
| 12            | 1             | -5.087684               | -0.113459 | -1.708605 |
| 13            | 1             | -5.982803               | -1.274481 | -0.743969 |
| 14            | 6             | -0.813419               | 0.218634  | -0.788461 |
| 15            | 6             | -2.534637               | 1.120652  | 1.430623  |
| 16            | 1             | -3.286487               | 1.777370  | 1.874277  |
| 17            | 1             | -2.253551               | 0.412048  | 2.215161  |
| 18            | 6             | -1.349833               | 1.976354  | 1.015583  |
| 19            | 6             | -0.252843               | 1.255720  | 0.223068  |
| 20            | 6             | -4.817647               | -0.978427 | 1.614321  |
| 21            | 1             | -4.380946               | -0.548536 | 2.519988  |
| 22            | 1             | -5.895231               | -1.057761 | 1.784460  |
| 23            | 1             | -4.444733               | -1.998229 | 1.510490  |

|    |   |           |           |           |
|----|---|-----------|-----------|-----------|
| 24 | 6 | -5.479858 | 1.126408  | 0.513728  |
| 25 | 1 | -5.294484 | 1.855744  | -0.281467 |
| 26 | 1 | -6.526760 | 0.818297  | 0.439596  |
| 27 | 1 | -5.365505 | 1.632735  | 1.475793  |
| 28 | 6 | -1.688739 | -1.683034 | 0.718358  |
| 29 | 1 | -2.577896 | -2.207698 | 1.058509  |
| 30 | 1 | -1.030719 | -2.449225 | 0.300719  |
| 31 | 1 | -1.212230 | -1.278492 | 1.612032  |
| 32 | 6 | 0.553431  | 2.340459  | -0.536493 |
| 33 | 1 | 0.678055  | 3.224897  | 0.106441  |
| 34 | 1 | -1.178578 | 0.800716  | -1.646817 |
| 35 | 6 | 0.331776  | -0.681663 | -1.283355 |
| 36 | 1 | 0.458198  | -1.538047 | -0.619082 |
| 37 | 6 | 1.671348  | 0.031129  | -1.349347 |
| 38 | 6 | 1.933065  | 1.801846  | -0.696383 |
| 39 | 6 | 3.044318  | 2.518928  | -1.368121 |
| 40 | 1 | 3.356584  | 3.305988  | -0.672566 |
| 41 | 1 | 3.905519  | 1.871164  | -1.536500 |
| 42 | 1 | 2.732302  | 3.002440  | -2.295088 |
| 43 | 6 | 2.058068  | 0.648717  | 0.112043  |
| 44 | 6 | 0.867657  | 0.595048  | 1.052432  |
| 45 | 1 | -1.741408 | 2.780447  | 0.379391  |
| 46 | 1 | -0.895477 | 2.470292  | 1.882630  |
| 47 | 1 | 0.108904  | -1.083315 | -2.274311 |
| 48 | 1 | 2.538596  | -0.586232 | -1.588985 |
| 49 | 1 | 1.634496  | 0.748629  | -2.191063 |
| 50 | 1 | 0.644758  | -0.417153 | 1.387088  |
| 51 | 1 | 3.036242  | 0.289897  | 0.424667  |
| 52 | 1 | 0.095691  | 2.688198  | -1.466833 |
| 53 | 1 | 1.113063  | 1.189602  | 1.939132  |
| 54 | 6 | 4.977477  | -1.057072 | 1.867653  |
| 55 | 6 | 4.513050  | -2.079541 | 1.046581  |
| 56 | 6 | 4.768171  | -2.044452 | -0.320381 |
| 57 | 6 | 5.485504  | -0.984903 | -0.867341 |
| 58 | 6 | 5.947626  | 0.038835  | -0.045965 |
| 59 | 6 | 5.694191  | 0.002307  | 1.321537  |
| 60 | 1 | 4.798790  | -1.096965 | 2.938149  |
| 61 | 1 | 3.973755  | -2.918385 | 1.476905  |
| 62 | 1 | 4.434155  | -2.860418 | -0.955496 |
| 63 | 1 | 5.714699  | -0.974772 | -1.929622 |
| 64 | 1 | 6.535491  | 0.850024  | -0.466670 |
| 65 | 1 | 6.076899  | 0.788214  | 1.966117  |

---

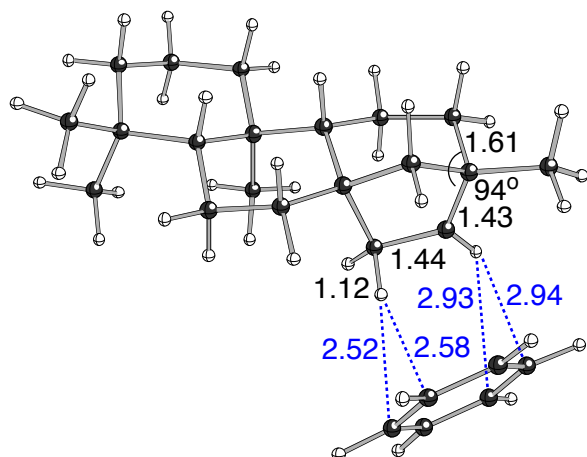

LC- $\omega$ PBE/6-31+G(d,p)//LC- $\omega$ PBE/6-31+G(d,p):  
HF = -1013.412429 hartrees (-635926.43332179 kcal/mol)  
Imaginary Frequencies: none found  
Zero-point correction = 0.604203 (Hartree/Particle)  
Counterpoise: BSSE energy = 0.000846927285 hartrees

Coordinates (from last standard orientation):

| Center Number | Atomic Number | Coordinates (Angstroms) |           |           |
|---------------|---------------|-------------------------|-----------|-----------|
|               |               | X                       | Y         | Z         |
| 1             | 6             | 3.963420                | -1.080397 | -0.313086 |
| 2             | 6             | 2.544050                | -0.487144 | -0.532023 |
| 3             | 6             | 2.046648                | 0.574244  | 0.490913  |
| 4             | 6             | 3.138359                | 1.646157  | 0.669653  |
| 5             | 6             | 4.511874                | 1.064586  | 0.980557  |
| 6             | 6             | 4.945575                | 0.080350  | -0.093533 |
| 7             | 1             | 2.645934                | 0.075262  | -1.475250 |
| 8             | 1             | 3.214753                | 2.233272  | -0.256151 |
| 9             | 1             | 2.851576                | 2.344641  | 1.463801  |
| 10            | 1             | 5.238157                | 1.880281  | 1.046997  |
| 11            | 1             | 4.517309                | 0.585875  | 1.965548  |
| 12            | 1             | 5.056119                | 0.624194  | -1.041638 |
| 13            | 1             | 5.934515                | -0.327978 | 0.142046  |
| 14            | 6             | 0.807369                | 1.265577  | -0.163580 |
| 15            | 6             | 1.458406                | -1.533228 | -0.781560 |
| 16            | 1             | 1.824921                | -2.307148 | -1.459555 |
| 17            | 1             | 1.187623                | -2.051438 | 0.143921  |
| 18            | 6             | 0.236689                | -0.887890 | -1.415259 |
| 19            | 6             | -0.313648               | 0.319923  | -0.659695 |
| 20            | 6             | 4.062128                | -2.095705 | 0.831224  |

|    |   |           |           |           |
|----|---|-----------|-----------|-----------|
| 21 | 1 | 3.307667  | -2.882342 | 0.739506  |
| 22 | 1 | 5.040027  | -2.584657 | 0.797877  |
| 23 | 1 | 3.964300  | -1.650404 | 1.821422  |
| 24 | 6 | 4.402400  | -1.802589 | -1.594928 |
| 25 | 1 | 4.257064  | -1.176228 | -2.481046 |
| 26 | 1 | 5.467146  | -2.046156 | -1.536058 |
| 27 | 1 | 3.870456  | -2.744758 | -1.750593 |
| 28 | 6 | 1.732698  | -0.022509 | 1.871063  |
| 29 | 1 | 2.649460  | -0.264982 | 2.404573  |
| 30 | 1 | 1.201725  | 0.688262  | 2.509173  |
| 31 | 1 | 1.150766  | -0.944812 | 1.828833  |
| 32 | 6 | -1.280317 | 1.106717  | -1.561693 |
| 33 | 1 | -1.937507 | 0.418104  | -2.106427 |
| 34 | 1 | 1.199850  | 1.740222  | -1.074810 |
| 35 | 6 | 0.195869  | 2.382003  | 0.694052  |
| 36 | 1 | -0.000986 | 2.018463  | 1.707645  |
| 37 | 6 | -1.088555 | 2.963623  | 0.106854  |
| 38 | 6 | -2.107123 | 1.928915  | -0.578785 |
| 39 | 6 | -3.331591 | 2.665859  | -1.077955 |
| 40 | 1 | -4.021092 | 1.970776  | -1.560273 |
| 41 | 1 | -3.859619 | 3.173771  | -0.267238 |
| 42 | 1 | -3.038826 | 3.416719  | -1.814754 |
| 43 | 6 | -2.196469 | 1.085688  | 0.577311  |
| 44 | 6 | -1.266606 | -0.016214 | 0.516874  |
| 45 | 1 | 0.520804  | -0.540143 | -2.416298 |
| 46 | 1 | -0.566140 | -1.619463 | -1.564875 |
| 47 | 1 | 0.905480  | 3.203710  | 0.809848  |
| 48 | 1 | -1.620003 | 3.579619  | 0.836842  |
| 49 | 1 | -0.857414 | 3.603363  | -0.751737 |
| 50 | 1 | -0.857830 | -0.333754 | 1.476298  |
| 51 | 1 | -2.826919 | 1.310384  | 1.436987  |
| 52 | 1 | -0.763860 | 1.731238  | -2.295377 |
| 53 | 1 | -1.955744 | -0.833649 | 0.194846  |
| 54 | 6 | -3.909192 | -2.198467 | 1.561856  |
| 55 | 6 | -4.616471 | -1.002566 | 1.552907  |
| 56 | 6 | -4.950309 | -0.399484 | 0.341114  |
| 57 | 6 | -4.584508 | -1.000385 | -0.860630 |
| 58 | 6 | -3.876409 | -2.196878 | -0.851056 |
| 59 | 6 | -3.536108 | -2.793728 | 0.359997  |
| 60 | 1 | -3.664505 | -2.678914 | 2.504374  |
| 61 | 1 | -4.935722 | -0.553891 | 2.489693  |
| 62 | 1 | -5.540415 | 0.513380  | 0.334541  |
| 63 | 1 | -4.879322 | -0.553260 | -1.805819 |
| 64 | 1 | -3.608877 | -2.678177 | -1.787126 |

65 1 -2.999935 -3.738120 0.366710

---

Beyeranyl cation in the complex

LC- $\omega$ PBE/6-31+G(d,p)//LC- $\omega$ PBE /6-31+G(d,p):

HF = -781.3120969 hartrees (-490281.153925719 kcal/mol)

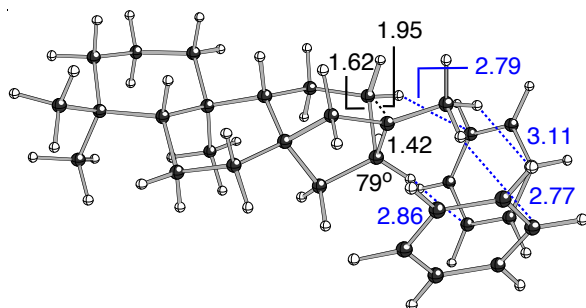

LC- $\omega$ PBE/6-31+G(d,p)//LC- $\omega$ PBE /6-31+G(d,p):

HF = -1245.5152771 hartrees (-781573.291533021 kcal/mol)

Imaginary Frequencies: none found

Zero-point correction = 0.707774 (Hartree/Particle)

Counterpoise: BSSE energy = 0.001448561207 hartrees

Coordinates (from last standard orientation):

---

| Center Number | Atomic Number | Coordinates (Angstroms) |           |           |
|---------------|---------------|-------------------------|-----------|-----------|
|               |               | X                       | Y         | Z         |
| 1             | 6             | -5.263001               | 0.640280  | 0.286877  |
| 2             | 6             | -3.727807               | 0.646544  | 0.034025  |
| 3             | 6             | -3.015772               | -0.722827 | -0.128633 |
| 4             | 6             | -3.813632               | -1.591811 | -1.118040 |
| 5             | 6             | -5.292059               | -1.694255 | -0.768137 |
| 6             | 6             | -5.926487               | -0.313340 | -0.718058 |
| 7             | 1             | -3.636213               | 1.122004  | -0.957217 |
| 8             | 1             | -3.730186               | -1.154871 | -2.122995 |
| 9             | 1             | -3.376738               | -2.595421 | -1.173307 |
| 10            | 1             | -5.799325               | -2.305697 | -1.520537 |
| 11            | 1             | -5.428334               | -2.219714 | 0.183152  |
| 12            | 1             | -5.863288               | 0.134938  | -1.719119 |
| 13            | 1             | -6.994063               | -0.390636 | -0.484053 |
| 14            | 6             | -1.622589               | -0.433647 | -0.779153 |
| 15            | 6             | -2.933139               | 1.520665  | 1.001749  |
| 16            | 1             | -3.459482               | 2.457722  | 1.198239  |

|    |   |           |           |           |
|----|---|-----------|-----------|-----------|
| 17 | 1 | -2.819305 | 1.030017  | 1.972732  |
| 18 | 6 | -1.580831 | 1.857996  | 0.396846  |
| 19 | 6 | -0.756235 | 0.666703  | -0.106037 |
| 20 | 6 | -5.686335 | 0.280669  | 1.717068  |
| 21 | 1 | -5.110717 | 0.831916  | 2.465667  |
| 22 | 1 | -6.737281 | 0.548770  | 1.858917  |
| 23 | 1 | -5.604453 | -0.783082 | 1.943900  |
| 24 | 6 | -5.806180 | 2.048297  | 0.002210  |
| 25 | 1 | -5.470630 | 2.421691  | -0.970754 |
| 26 | 1 | -6.899738 | 2.027672  | -0.013195 |
| 27 | 1 | -5.513022 | 2.773006  | 0.766370  |
| 28 | 6 | -2.901976 | -1.482406 | 1.201181  |
| 29 | 1 | -3.882072 | -1.624265 | 1.649915  |
| 30 | 1 | -2.489271 | -2.484521 | 1.060863  |
| 31 | 1 | -2.294987 | -0.968687 | 1.947551  |
| 32 | 6 | 0.272450  | 1.221797  | -1.124051 |
| 33 | 1 | 0.656370  | 2.192034  | -0.773842 |
| 34 | 1 | -1.860858 | -0.056905 | -1.784321 |
| 35 | 6 | -0.787716 | -1.715959 | -0.942183 |
| 36 | 1 | -0.873418 | -2.341112 | -0.051856 |
| 37 | 6 | 0.692036  | -1.453464 | -1.159698 |
| 38 | 6 | 1.459803  | 0.331730  | -1.056842 |
| 39 | 6 | 2.685076  | 0.503682  | -1.861857 |
| 40 | 1 | 3.217641  | 1.343235  | -1.394462 |
| 41 | 1 | 3.337967  | -0.368403 | -1.808992 |
| 42 | 1 | 2.474635  | 0.779888  | -2.896031 |
| 43 | 6 | 1.298218  | -0.546875 | 0.043883  |
| 44 | 6 | 0.186440  | 0.006058  | 0.920723  |
| 45 | 1 | -1.768735 | 2.514195  | -0.462738 |
| 46 | 1 | -0.969509 | 2.441736  | 1.095476  |
| 47 | 1 | -1.156608 | -2.313329 | -1.779038 |
| 48 | 1 | 1.336526  | -2.334082 | -1.163932 |
| 49 | 1 | 0.824915  | -1.039023 | -2.176657 |
| 50 | 1 | -0.283636 | -0.761740 | 1.533933  |
| 51 | 1 | 2.164323  | -1.034622 | 0.485714  |
| 52 | 1 | -0.112814 | 1.380407  | -2.135274 |
| 53 | 1 | 0.625538  | 0.749741  | 1.594009  |
| 54 | 6 | 3.721279  | -3.023537 | 1.829311  |
| 55 | 6 | 2.974629  | -3.967411 | 1.131711  |
| 56 | 6 | 3.207532  | -4.174957 | -0.223673 |
| 57 | 6 | 4.182458  | -3.433862 | -0.883952 |
| 58 | 6 | 4.926726  | -2.487967 | -0.186683 |
| 59 | 6 | 4.697623  | -2.284853 | 1.170167  |
| 60 | 1 | 3.556894  | -2.879981 | 2.893308  |

|    |   |          |           |           |
|----|---|----------|-----------|-----------|
| 61 | 1 | 2.228394 | -4.561179 | 1.651662  |
| 62 | 1 | 2.646861 | -4.935369 | -0.760521 |
| 63 | 1 | 4.383129 | -3.615774 | -1.936202 |
| 64 | 1 | 5.708320 | -1.929645 | -0.694484 |
| 65 | 1 | 5.297640 | -1.566030 | 1.720456  |
| 66 | 6 | 4.702252 | 2.318555  | 0.958189  |
| 67 | 6 | 5.209272 | 2.861556  | -0.217253 |
| 68 | 6 | 4.469282 | 3.803066  | -0.924721 |
| 69 | 6 | 3.223729 | 4.205176  | -0.454443 |
| 70 | 6 | 2.718969 | 3.665431  | 0.724084  |
| 71 | 6 | 3.456810 | 2.719930  | 1.429089  |
| 72 | 1 | 5.289865 | 1.599507  | 1.521257  |
| 73 | 1 | 6.191060 | 2.564413  | -0.574011 |
| 74 | 1 | 4.872942 | 4.239588  | -1.833489 |
| 75 | 1 | 2.658194 | 4.959560  | -0.993869 |
| 76 | 1 | 1.762328 | 4.006983  | 1.110921  |
| 77 | 1 | 3.076202 | 2.319280  | 2.364648  |

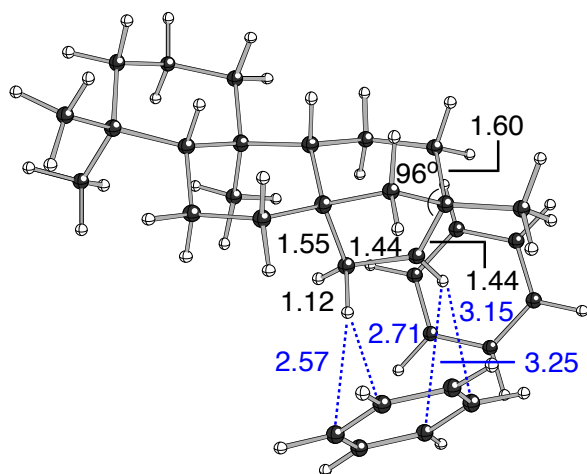

LC- $\omega$ PBE/6-31+G(d,p)//LC- $\omega$ PBE /6-31+G(d,p):

HF = -1245.5086936 hartrees (-781569.160320936 kcal/mol)

Imaginary Frequencies: none found

Zero-point correction = 0.707445 (Hartree/Particle)

Counterpoise: BSSE energy = 0.00179749779 hartrees

Coordinates (from last standard orientation):

| Center<br>Number | Atomic<br>Number | Coordinates (Angstroms) |          |           |
|------------------|------------------|-------------------------|----------|-----------|
|                  |                  | X                       | Y        | Z         |
| 1                | 6                | 4.786064                | 0.377393 | -0.520770 |

|    |   |           |           |           |
|----|---|-----------|-----------|-----------|
| 2  | 6 | 3.375022  | 0.459718  | 0.123085  |
| 3  | 6 | 2.478833  | -0.808772 | 0.042883  |
| 4  | 6 | 3.295272  | -2.027185 | 0.512919  |
| 5  | 6 | 4.642727  | -2.160234 | -0.185735 |
| 6  | 6 | 5.475286  | -0.899570 | -0.016396 |
| 7  | 1 | 3.591770  | 0.567980  | 1.199019  |
| 8  | 1 | 3.474525  | -1.938582 | 1.593454  |
| 9  | 1 | 2.717074  | -2.945980 | 0.363640  |
| 10 | 1 | 5.180385  | -3.015655 | 0.234347  |
| 11 | 1 | 4.508365  | -2.390498 | -1.248056 |
| 12 | 1 | 5.703288  | -0.771234 | 1.050560  |
| 13 | 1 | 6.439778  | -1.009956 | -0.524315 |
| 14 | 6 | 1.320640  | -0.592417 | 1.069062  |
| 15 | 6 | 2.575631  | 1.701197  | -0.270809 |
| 16 | 1 | 3.216578  | 2.585669  | -0.258038 |
| 17 | 1 | 2.198616  | 1.621185  | -1.295515 |
| 18 | 6 | 1.432841  | 1.930063  | 0.706108  |
| 19 | 6 | 0.521159  | 0.723561  | 0.919360  |
| 20 | 6 | 4.792449  | 0.425061  | -2.052911 |
| 21 | 1 | 4.233194  | 1.285132  | -2.432411 |
| 22 | 1 | 5.821839  | 0.530890  | -2.407503 |
| 23 | 1 | 4.386217  | -0.472123 | -2.520117 |
| 24 | 6 | 5.626494  | 1.564898  | -0.029968 |
| 25 | 1 | 5.579607  | 1.669549  | 1.058880  |
| 26 | 1 | 6.675376  | 1.413307  | -0.300932 |
| 27 | 1 | 5.317312  | 2.512456  | -0.478630 |
| 28 | 6 | 1.966360  | -1.095216 | -1.377050 |
| 29 | 1 | 2.753650  | -1.522953 | -1.995130 |
| 30 | 1 | 1.160250  | -1.833078 | -1.374310 |
| 31 | 1 | 1.611612  | -0.206607 | -1.902109 |
| 32 | 6 | -0.347653 | 0.935539  | 2.170946  |
| 33 | 1 | -0.736726 | 1.960473  | 2.193500  |
| 34 | 1 | 1.822923  | -0.506896 | 2.043912  |
| 35 | 6 | 0.350644  | -1.777099 | 1.168462  |
| 36 | 1 | -0.008738 | -2.060852 | 0.174294  |
| 37 | 6 | -0.850812 | -1.507475 | 2.070969  |
| 38 | 6 | -1.500365 | -0.047184 | 1.981157  |
| 39 | 6 | -2.703922 | 0.036896  | 2.896652  |
| 40 | 1 | -3.138868 | 1.037169  | 2.862305  |
| 41 | 1 | -3.472490 | -0.686839 | 2.614758  |
| 42 | 1 | -2.403420 | -0.166542 | 3.926708  |
| 43 | 6 | -1.697533 | -0.068557 | 0.558842  |
| 44 | 6 | -0.594294 | 0.542347  | -0.142010 |
| 45 | 1 | 1.868572  | 2.181271  | 1.681285  |



|    |   |           |           |           |
|----|---|-----------|-----------|-----------|
| 46 | 1 | 0.827174  | 2.795077  | 0.411810  |
| 47 | 1 | 0.865821  | -2.656904 | 1.559748  |
| 48 | 1 | -1.628015 | -2.261610 | 1.930274  |
| 49 | 1 | -0.550705 | -1.529167 | 3.124195  |
| 50 | 1 | -0.364948 | 0.103880  | -1.113484 |
| 51 | 1 | -2.545430 | -0.552918 | 0.068210  |
| 52 | 1 | 0.198445  | 0.760108  | 3.101706  |
| 53 | 1 | -1.038850 | 1.543142  | -0.358585 |
| 54 | 6 | -2.664275 | 2.874646  | -2.006610 |
| 55 | 6 | -3.660712 | 2.123350  | -1.395726 |
| 56 | 6 | -3.917762 | 2.280131  | -0.036307 |
| 57 | 6 | -3.183384 | 3.199335  | 0.708453  |
| 58 | 6 | -2.185357 | 3.950276  | 0.097766  |
| 59 | 6 | -1.922941 | 3.785030  | -1.258839 |
| 60 | 1 | -2.474521 | 2.764854  | -3.070149 |
| 61 | 1 | -4.252828 | 1.429512  | -1.983924 |
| 62 | 1 | -4.718801 | 1.715157  | 0.433224  |
| 63 | 1 | -3.409902 | 3.354703  | 1.759558  |
| 64 | 1 | -1.625186 | 4.681057  | 0.673798  |
| 65 | 1 | -1.155311 | 4.384152  | -1.739742 |
| 66 | 6 | -4.533941 | -1.697861 | -1.493140 |
| 67 | 6 | -3.384731 | -1.948031 | -2.236100 |
| 68 | 6 | -2.446064 | -2.865488 | -1.775822 |
| 69 | 6 | -2.658261 | -3.533267 | -0.573844 |
| 70 | 6 | -3.805809 | -3.279744 | 0.170766  |
| 71 | 6 | -4.743423 | -2.360522 | -0.288084 |
| 72 | 1 | -5.284046 | -1.006881 | -1.866679 |
| 73 | 1 | -3.232653 | -1.447508 | -3.188057 |
| 74 | 1 | -1.562697 | -3.082364 | -2.369919 |
| 75 | 1 | -1.940426 | -4.273003 | -0.230224 |
| 76 | 1 | -3.984441 | -3.821067 | 1.095698  |
| 77 | 1 | -5.652454 | -2.182439 | 0.279075  |

-----  
 $\omega$ B97XD

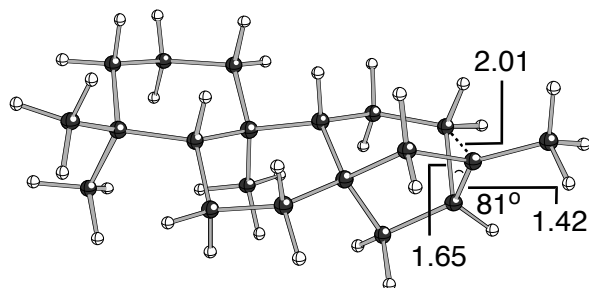

$\omega$ B97XD/6-31+G(d,p)// $\omega$ B97XD /6-31+G(d,p):

HF = -781.6042526 hartrees (-490464.484549026 kcal/mol)

Imaginary Frequencies: none found

Zero-point correction = 0.497431 (Hartree/Particle)

Coordinates (from last standard orientation):

| -----  |        |                         |           |           |
|--------|--------|-------------------------|-----------|-----------|
| Center | Atomic | Coordinates (Angstroms) |           |           |
| Number | Number | X                       | Y         | Z         |
| -----  |        |                         |           |           |
| 1      | 6      | 3.158459                | -0.528862 | -0.202774 |
| 2      | 6      | 1.597375                | -0.584123 | -0.222200 |
| 3      | 6      | 0.823739                | 0.718455  | 0.149495  |
| 4      | 6      | 1.425012                | 1.911541  | -0.628780 |
| 5      | 6      | 2.942948                | 2.018928  | -0.493030 |
| 6      | 6      | 3.619766                | 0.733657  | -0.959485 |
| 7      | 1      | 1.361905                | -0.749894 | -1.287580 |
| 8      | 1      | 1.185879                | 1.795231  | -1.696010 |
| 9      | 1      | 0.958550                | 2.847908  | -0.299424 |
| 10     | 1      | 3.298409                | 2.862404  | -1.093226 |
| 11     | 1      | 3.221396                | 2.248851  | 0.541635  |
| 12     | 1      | 3.407994                | 0.596394  | -2.029664 |
| 13     | 1      | 4.708432                | 0.824709  | -0.869693 |
| 14     | 6      | -0.652663               | 0.528748  | -0.356411 |
| 15     | 6      | 0.997461                | -1.771328 | 0.538580  |
| 16     | 1      | 1.562970                | -2.684743 | 0.337781  |
| 17     | 1      | 1.052927                | -1.615305 | 1.620169  |
| 18     | 6      | -0.440082               | -2.007572 | 0.091261  |
| 19     | 6      | -1.368180               | -0.779504 | 0.100363  |
| 20     | 6      | 3.787606                | -0.567821 | 1.201825  |
| 21     | 1      | 3.367658                | -1.370542 | 1.815718  |
| 22     | 1      | 4.861811                | -0.757293 | 1.110505  |
| 23     | 1      | 3.680222                | 0.369040  | 1.751442  |
| 24     | 6      | 3.698647                | -1.748375 | -0.974937 |
| 25     | 1      | 3.220890                | -1.847845 | -1.956248 |
| 26     | 1      | 4.774498                | -1.634548 | -1.141671 |
| 27     | 1      | 3.556969                | -2.686116 | -0.429251 |
| 28     | 6      | 0.899477                | 1.030756  | 1.657371  |
| 29     | 1      | 1.931293                | 1.178420  | 1.968543  |
| 30     | 1      | 0.377831                | 1.958030  | 1.909363  |
| 31     | 1      | 0.499835                | 0.236203  | 2.289744  |
| 32     | 6      | -2.554930               | -1.108306 | -0.856477 |
| 33     | 1      | -2.829360               | -2.171702 | -0.750242 |

|    |   |           |           |           |
|----|---|-----------|-----------|-----------|
| 34 | 1 | -0.566416 | 0.461064  | -1.450458 |
| 35 | 6 | -1.530192 | 1.759607  | -0.026251 |
| 36 | 1 | -1.295759 | 2.141696  | 0.968535  |
| 37 | 6 | -3.026875 | 1.481270  | -0.057006 |
| 38 | 6 | -3.739382 | -0.375728 | -0.337510 |
| 39 | 6 | -5.083345 | -0.399812 | -0.957356 |
| 40 | 1 | -5.514158 | -1.374217 | -0.688807 |
| 41 | 1 | -5.744107 | 0.371849  | -0.558740 |
| 42 | 1 | -5.041255 | -0.352294 | -2.047228 |
| 43 | 6 | -3.398348 | 0.196836  | 0.917586  |
| 44 | 6 | -2.132094 | -0.494125 | 1.417450  |
| 45 | 1 | -0.394901 | -2.371210 | -0.944337 |
| 46 | 1 | -0.908210 | -2.810140 | 0.674998  |
| 47 | 1 | -1.326856 | 2.572224  | -0.727905 |
| 48 | 1 | -3.663899 | 2.280497  | 0.325879  |
| 49 | 1 | -3.345245 | 1.373131  | -1.108304 |
| 50 | 1 | -1.579337 | 0.113151  | 2.132775  |
| 51 | 1 | -4.181483 | 0.474297  | 1.618269  |
| 52 | 1 | -2.359114 | -0.944191 | -1.920614 |
| 53 | 1 | -2.425752 | -1.420510 | 1.923763  |

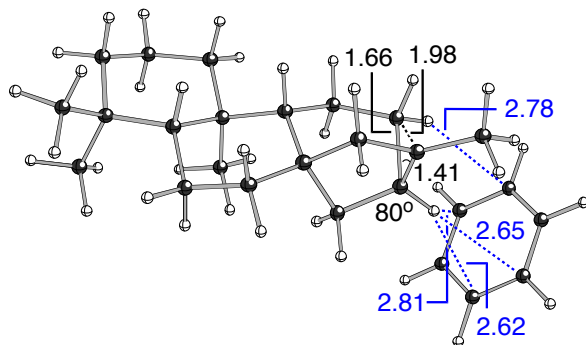

$\omega$ B97XD/6-31+G(d,p)// $\omega$ B97XD/6-31+G(d,p):

HF = -1013.8024822 hartrees (-636171.195605322 kcal/mol)

Imaginary Frequencies: none found

Zero-point correction = 0.600855 (Hartree/Particle)

Counterpoise: BSSE energy = 0.000795635142 hartrees

Coordinates (from last standard orientation):

| Center Number | Atomic Number | Coordinates (Angstroms) |   |   |
|---------------|---------------|-------------------------|---|---|
|               |               | X                       | Y | Z |

|    |   |           |           |           |
|----|---|-----------|-----------|-----------|
| 1  | 6 | -4.500413 | -0.111164 | 0.400368  |
| 2  | 6 | -3.037219 | 0.409040  | 0.229269  |
| 3  | 6 | -1.986143 | -0.576097 | -0.368410 |
| 4  | 6 | -2.572779 | -1.240567 | -1.634997 |
| 5  | 6 | -3.952499 | -1.856735 | -1.409632 |
| 6  | 6 | -4.937739 | -0.806785 | -0.905151 |
| 7  | 1 | -3.135848 | 1.201185  | -0.532909 |
| 8  | 1 | -2.661557 | -0.480314 | -2.424884 |
| 9  | 1 | -1.883852 | -2.007268 | -2.009878 |
| 10 | 1 | -4.316203 | -2.282144 | -2.350347 |
| 11 | 1 | -3.888574 | -2.694684 | -0.705967 |
| 12 | 1 | -5.058736 | -0.040865 | -1.684873 |
| 13 | 1 | -5.927220 | -1.254539 | -0.756418 |
| 14 | 6 | -0.755147 | 0.290805  | -0.821245 |
| 15 | 6 | -2.456636 | 1.084566  | 1.476157  |
| 16 | 1 | -3.202085 | 1.727703  | 1.950677  |
| 17 | 1 | -2.172889 | 0.344173  | 2.230385  |
| 18 | 6 | -1.266394 | 1.953811  | 1.089869  |
| 19 | 6 | -0.176591 | 1.272851  | 0.244029  |
| 20 | 6 | -4.715224 | -1.049953 | 1.601692  |
| 21 | 1 | -4.281657 | -0.641524 | 2.519887  |
| 22 | 1 | -5.788612 | -1.174218 | 1.776879  |
| 23 | 1 | -4.304703 | -2.049964 | 1.451130  |
| 24 | 6 | -5.427811 | 1.102748  | 0.605001  |
| 25 | 1 | -5.262590 | 1.868891  | -0.161079 |
| 26 | 1 | -6.473974 | 0.787618  | 0.536146  |
| 27 | 1 | -5.297702 | 1.567411  | 1.587091  |
| 28 | 6 | -1.593278 | -1.684405 | 0.628566  |
| 29 | 1 | -2.464947 | -2.261431 | 0.928740  |
| 30 | 1 | -0.896474 | -2.401731 | 0.186351  |
| 31 | 1 | -1.145502 | -1.303150 | 1.547707  |
| 32 | 6 | 0.628911  | 2.410684  | -0.456909 |
| 33 | 1 | 0.740302  | 3.262911  | 0.233799  |
| 34 | 1 | -1.141196 | 0.921369  | -1.635230 |
| 35 | 6 | 0.379038  | -0.585247 | -1.402908 |
| 36 | 1 | 0.505635  | -1.492868 | -0.810663 |
| 37 | 6 | 1.732548  | 0.107964  | -1.449667 |
| 38 | 6 | 2.014747  | 1.896357  | -0.637420 |
| 39 | 6 | 3.124260  | 2.641664  | -1.277725 |
| 40 | 1 | 3.445397  | 3.388495  | -0.539624 |
| 41 | 1 | 3.980292  | 1.997187  | -1.486683 |
| 42 | 1 | 2.807522  | 3.179703  | -2.173350 |
| 43 | 6 | 2.136237  | 0.672872  | 0.062381  |
| 44 | 6 | 0.956281  | 0.553259  | 1.017416  |

|    |   |           |           |           |
|----|---|-----------|-----------|-----------|
| 45 | 1 | -1.660810 | 2.791681  | 0.499147  |
| 46 | 1 | -0.799207 | 2.399857  | 1.976853  |
| 47 | 1 | 0.131756  | -0.906616 | -2.417777 |
| 48 | 1 | 2.588913  | -0.526776 | -1.683805 |
| 49 | 1 | 1.721288  | 0.858449  | -2.257459 |
| 50 | 1 | 0.738883  | -0.480998 | 1.280443  |
| 51 | 1 | 3.113538  | 0.291479  | 0.340464  |
| 52 | 1 | 0.174994  | 2.806602  | -1.370603 |
| 53 | 1 | 1.215874  | 1.082508  | 1.941432  |
| 54 | 6 | 4.843726  | -0.916054 | 1.898541  |
| 55 | 6 | 4.198381  | -1.995315 | 1.293013  |
| 56 | 6 | 4.331765  | -2.207926 | -0.079553 |
| 57 | 6 | 5.107929  | -1.338988 | -0.848430 |
| 58 | 6 | 5.747120  | -0.255181 | -0.244055 |
| 59 | 6 | 5.616759  | -0.045160 | 1.129905  |
| 60 | 1 | 4.754856  | -0.762377 | 2.969258  |
| 61 | 1 | 3.609451  | -2.681021 | 1.894067  |
| 62 | 1 | 3.852530  | -3.064253 | -0.544585 |
| 63 | 1 | 5.238558  | -1.521822 | -1.911124 |
| 64 | 1 | 6.373080  | 0.404770  | -0.837467 |
| 65 | 1 | 6.132487  | 0.784303  | 1.603639  |

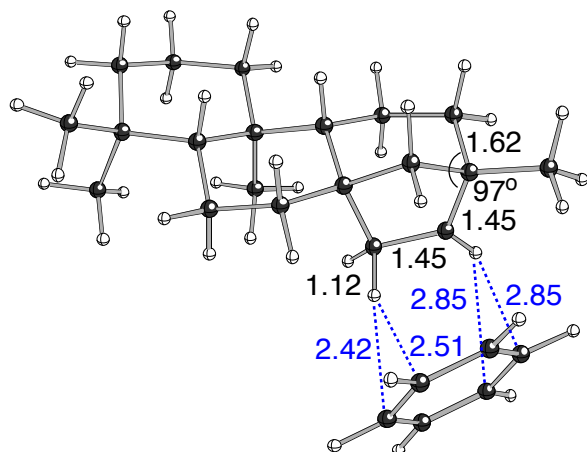

$\omega$ B97XD/6-31+G(d,p)// $\omega$ B97XD /6-31+G(d,p):

HF = -1013.8011896 hartrees (-636170.3844858960 kcal/mol)

Imaginary Frequencies: none found

Zero-point correction = 0.600855 (Hartree/Particle)

Counterpoise: BSSE energy = 0.001071668783 hartrees

Coordinates (from last standard orientation):

| Center<br>Number | Atomic<br>Number | Coordinates (Angstroms) |           |           |
|------------------|------------------|-------------------------|-----------|-----------|
|                  |                  | X                       | Y         | Z         |
| 1                | 6                | 3.947868                | -1.064673 | -0.295492 |
| 2                | 6                | 2.517431                | -0.488190 | -0.528346 |
| 3                | 6                | 2.024791                | 0.618659  | 0.459677  |
| 4                | 6                | 3.113704                | 1.711096  | 0.573751  |
| 5                | 6                | 4.504024                | 1.155743  | 0.884328  |
| 6                | 6                | 4.929837                | 0.115547  | -0.147165 |
| 7                | 1                | 2.605445                | 0.033100  | -1.496637 |
| 8                | 1                | 3.166615                | 2.258230  | -0.378687 |
| 9                | 1                | 2.833300                | 2.439996  | 1.343159  |
| 10               | 1                | 5.223879                | 1.980337  | 0.893202  |
| 11               | 1                | 4.533091                | 0.726963  | 1.892640  |
| 12               | 1                | 5.024983                | 0.610772  | -1.124200 |
| 13               | 1                | 5.924358                | -0.275058 | 0.097862  |
| 14               | 6                | 0.761124                | 1.271060  | -0.203857 |
| 15               | 6                | 1.433640                | -1.555521 | -0.723728 |
| 16               | 1                | 1.796397                | -2.349970 | -1.380313 |
| 17               | 1                | 1.181561                | -2.041812 | 0.225299  |
| 18               | 6                | 0.190306                | -0.944169 | -1.359055 |
| 19               | 6                | -0.361017               | 0.284705  | -0.631175 |
| 20               | 6                | 4.057950                | -2.018884 | 0.906331  |
| 21               | 1                | 3.300710                | -2.808277 | 0.862134  |
| 22               | 1                | 5.037018                | -2.508375 | 0.894317  |
| 23               | 1                | 3.962982                | -1.517425 | 1.870326  |
| 24               | 6                | 4.376488                | -1.858095 | -1.545356 |
| 25               | 1                | 4.204404                | -1.287435 | -2.465008 |
| 26               | 1                | 5.446642                | -2.082482 | -1.491051 |
| 27               | 1                | 3.854345                | -2.815485 | -1.633809 |
| 28               | 6                | 1.738765                | 0.075330  | 1.874799  |
| 29               | 1                | 2.666432                | -0.106542 | 2.415038  |
| 30               | 1                | 1.178842                | 0.793873  | 2.480040  |
| 31               | 1                | 1.192913                | -0.870935 | 1.876394  |
| 32               | 6                | -1.377327               | 1.021226  | -1.529975 |
| 33               | 1                | -2.041184               | 0.301801  | -2.024868 |
| 34               | 1                | 1.128844                | 1.703938  | -1.146218 |
| 35               | 6                | 0.159006                | 2.432266  | 0.612038  |
| 36               | 1                | -0.005670               | 2.124229  | 1.650114  |
| 37               | 6                | -1.153361               | 2.971537  | 0.037198  |
| 38               | 6                | -2.182275               | 1.870401  | -0.541263 |
| 39               | 6                | -3.443295               | 2.561391  | -1.031554 |
| 40               | 1                | -4.120342               | 1.834735  | -1.486044 |

|    |   |           |           |           |
|----|---|-----------|-----------|-----------|
| 41 | 1 | -3.969810 | 3.068934  | -0.217994 |
| 42 | 1 | -3.187102 | 3.306256  | -1.788733 |
| 43 | 6 | -2.242635 | 1.035153  | 0.637628  |
| 44 | 6 | -1.273097 | -0.039737 | 0.593451  |
| 45 | 1 | 0.450861  | -0.627463 | -2.377633 |
| 46 | 1 | -0.607370 | -1.690275 | -1.465478 |
| 47 | 1 | 0.865897  | 3.263581  | 0.660222  |
| 48 | 1 | -1.671683 | 3.611202  | 0.756180  |
| 49 | 1 | -0.963173 | 3.566391  | -0.863184 |
| 50 | 1 | -0.817459 | -0.271185 | 1.557574  |
| 51 | 1 | -2.834667 | 1.285941  | 1.515588  |
| 52 | 1 | -0.897752 | 1.627052  | -2.303585 |
| 53 | 1 | -1.890917 | -0.931849 | 0.339947  |
| 54 | 6 | -3.841475 | -2.213920 | 1.561324  |
| 55 | 6 | -4.534590 | -1.007133 | 1.528190  |
| 56 | 6 | -4.800519 | -0.387273 | 0.301340  |
| 57 | 6 | -4.392543 | -0.990857 | -0.891834 |
| 58 | 6 | -3.697147 | -2.196705 | -0.858043 |
| 59 | 6 | -3.415592 | -2.804429 | 0.368815  |
| 60 | 1 | -3.643305 | -2.702299 | 2.509650  |
| 61 | 1 | -4.888414 | -0.556859 | 2.450713  |
| 62 | 1 | -5.375625 | 0.533863  | 0.274778  |
| 63 | 1 | -4.634076 | -0.531187 | -1.845217 |
| 64 | 1 | -3.386545 | -2.672719 | -1.782470 |
| 65 | 1 | -2.884781 | -3.750724 | 0.393799  |

-----  
Beyeranyl cation in the complex

$\omega$ B97XD/6-31+G(d,p)// $\omega$ B97XD/6-31+G(d,p):

HF = -781.5934851 hartrees (-490457.727835101 kcal/mol)

PBE1

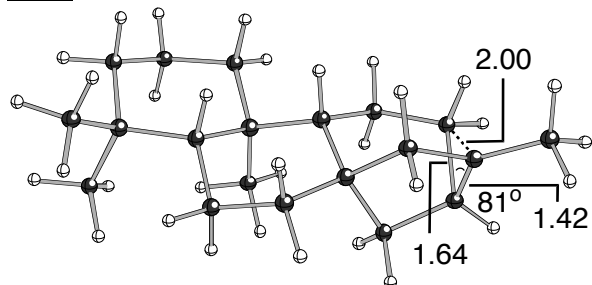

PBE1/6-31+G(d,p)//PBE1/6-31+G(d,p):

HF = -780.8644222 hartrees (-490000.233574722 kcal/mol)

Imaginary Frequencies: none found

Zero-point correction = 0.494235 (Hartree/Particle)

Coordinates (from last standard orientation):

| Center<br>Number | Atomic<br>Number | Coordinates (Angstroms) |           |           |
|------------------|------------------|-------------------------|-----------|-----------|
|                  |                  | X                       | Y         | Z         |
| 1                | 6                | 3.154191                | -0.529609 | -0.206262 |
| 2                | 6                | 1.594496                | -0.582705 | -0.213571 |
| 3                | 6                | 0.824407                | 0.720897  | 0.153750  |
| 4                | 6                | 1.422436                | 1.906455  | -0.633444 |
| 5                | 6                | 2.937964                | 2.012039  | -0.503525 |
| 6                | 6                | 3.609119                | 0.727671  | -0.969775 |
| 7                | 1                | 1.351338                | -0.754082 | -1.277955 |
| 8                | 1                | 1.178030                | 1.784220  | -1.699845 |
| 9                | 1                | 0.956845                | 2.846422  | -0.309779 |
| 10               | 1                | 3.293197                | 2.855883  | -1.105654 |
| 11               | 1                | 3.221485                | 2.245019  | 0.530108  |
| 12               | 1                | 3.387205                | 0.586699  | -2.038400 |
| 13               | 1                | 4.700062                | 0.815285  | -0.893425 |
| 14               | 6                | -0.652147               | 0.528925  | -0.343576 |
| 15               | 6                | 0.996631                | -1.761820 | 0.555773  |
| 16               | 1                | 1.565616                | -2.676469 | 0.364680  |
| 17               | 1                | 1.051490                | -1.595342 | 1.636933  |
| 18               | 6                | -0.437765               | -2.003048 | 0.108624  |
| 19               | 6                | -1.367283               | -0.778846 | 0.109430  |
| 20               | 6                | 3.796579                | -0.565295 | 1.189023  |
| 21               | 1                | 3.398059                | -1.379102 | 1.803604  |
| 22               | 1                | 4.873320                | -0.738305 | 1.086060  |
| 23               | 1                | 3.682011                | 0.365517  | 1.748985  |
| 24               | 6                | 3.686021                | -1.748545 | -0.977833 |
| 25               | 1                | 3.218232                | -1.836429 | -1.965590 |
| 26               | 1                | 4.765530                | -1.647619 | -1.133261 |
| 27               | 1                | 3.528789                | -2.688799 | -0.439675 |
| 28               | 6                | 0.904649                | 1.043961  | 1.655380  |
| 29               | 1                | 1.939605                | 1.178850  | 1.966570  |
| 30               | 1                | 0.398276                | 1.982996  | 1.899429  |
| 31               | 1                | 0.491338                | 0.261319  | 2.295711  |
| 32               | 6                | -2.544341               | -1.106387 | -0.854930 |
| 33               | 1                | -2.823168               | -2.170083 | -0.742691 |
| 34               | 1                | -0.568644               | 0.466248  | -1.439707 |
| 35               | 6                | -1.530575               | 1.751639  | -0.004784 |
| 36               | 1                | -1.304925               | 2.114577  | 1.001096  |
| 37               | 6                | -3.022672               | 1.471207  | -0.053983 |



|    |   |           |           |           |
|----|---|-----------|-----------|-----------|
| 38 | 6 | -3.731923 | -0.371608 | -0.352393 |
| 39 | 6 | -5.070017 | -0.396809 | -0.978499 |
| 40 | 1 | -5.507491 | -1.366805 | -0.698301 |
| 41 | 1 | -5.733996 | 0.378937  | -0.591208 |
| 42 | 1 | -5.029648 | -0.366662 | -2.069808 |
| 43 | 6 | -3.401148 | 0.196329  | 0.910672  |
| 44 | 6 | -2.142854 | -0.495953 | 1.417354  |
| 45 | 1 | -0.391407 | -2.374585 | -0.924971 |
| 46 | 1 | -0.907641 | -2.803676 | 0.695806  |
| 47 | 1 | -1.320503 | 2.579283  | -0.688615 |
| 48 | 1 | -3.672961 | 2.270627  | 0.311509  |
| 49 | 1 | -3.328320 | 1.360937  | -1.112391 |
| 50 | 1 | -1.594791 | 0.105930  | 2.142857  |
| 51 | 1 | -4.192446 | 0.470313  | 1.605912  |
| 52 | 1 | -2.335957 | -0.956886 | -1.919945 |
| 53 | 1 | -2.443140 | -1.425208 | 1.917369  |

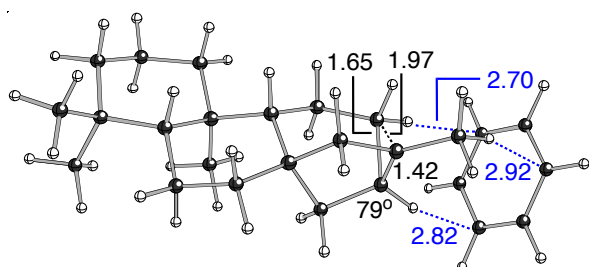

PBE1/6-31+G(d,p)//PBE1/6-31+G(d,p):

HF = -1012.8559451 hartrees (-635577.234109701 kcal/mol)

Imaginary Frequencies: 1 (-1.0949 1/cm)

Zero-point correction = 0.596301 (Hartree/Particle)

Counterpoise: BSSE energy = 0.000835467066 hartrees

Coordinates (from last standard orientation):

| Center Number | Atomic Number | Coordinates (Angstroms) |           |           |
|---------------|---------------|-------------------------|-----------|-----------|
|               |               | X                       | Y         | Z         |
| 1             | 6             | -4.651814               | -0.149435 | 0.122503  |
| 2             | 6             | -3.187762               | 0.376438  | 0.002210  |
| 3             | 6             | -2.046989               | -0.677919 | -0.104932 |
| 4             | 6             | -2.428886               | -1.729683 | -1.168561 |
| 5             | 6             | -3.817276               | -2.325204 | -0.957606 |
| 6             | 6             | -4.877779               | -1.232382 | -0.947514 |

|    |   |           |           |           |
|----|---|-----------|-----------|-----------|
| 7  | 1 | -3.181468 | 0.887209  | -0.977927 |
| 8  | 1 | -2.408471 | -1.253369 | -2.160839 |
| 9  | 1 | -1.680571 | -2.532524 | -1.189635 |
| 10 | 1 | -4.028897 | -3.039082 | -1.761688 |
| 11 | 1 | -3.850935 | -2.907299 | -0.028295 |
| 12 | 1 | -4.889392 | -0.749045 | -1.936035 |
| 13 | 1 | -5.875400 | -1.667567 | -0.809011 |
| 14 | 6 | -0.774814 | 0.079411  | -0.630217 |
| 15 | 6 | -2.810256 | 1.438789  | 1.036593  |
| 16 | 1 | -3.629807 | 2.149890  | 1.177485  |
| 17 | 1 | -2.632695 | 0.988560  | 2.019568  |
| 18 | 6 | -1.592523 | 2.216730  | 0.561832  |
| 19 | 6 | -0.379175 | 1.378277  | 0.132122  |
| 20 | 6 | -5.035623 | -0.684068 | 1.511098  |
| 21 | 1 | -4.764636 | 0.016281  | 2.308098  |
| 22 | 1 | -6.121497 | -0.820450 | 1.558621  |
| 23 | 1 | -4.588206 | -1.652044 | 1.747678  |
| 24 | 6 | -5.612402 | 1.009363  | -0.192658 |
| 25 | 1 | -5.356136 | 1.500074  | -1.139071 |
| 26 | 1 | -6.635406 | 0.628987  | -0.285343 |
| 27 | 1 | -5.625776 | 1.769657  | 0.594706  |
| 28 | 6 | -1.795309 | -1.403546 | 1.227267  |
| 29 | 1 | -2.692280 | -1.924578 | 1.558645  |
| 30 | 1 | -1.022773 | -2.172857 | 1.132883  |
| 31 | 1 | -1.508575 | -0.735544 | 2.042656  |
| 32 | 6 | 0.498594  | 2.282060  | -0.781316 |
| 33 | 1 | 0.496341  | 3.313930  | -0.387641 |
| 34 | 1 | -1.044150 | 0.395882  | -1.649960 |
| 35 | 6 | 0.448059  | -0.856842 | -0.732670 |
| 36 | 1 | 0.497405  | -1.514031 | 0.139154  |
| 37 | 6 | 1.777964  | -0.127279 | -0.812184 |
| 38 | 6 | 1.903762  | 1.827415  | -0.609054 |
| 39 | 6 | 3.074539  | 2.409181  | -1.301465 |
| 40 | 1 | 3.282005  | 3.359690  | -0.788952 |
| 41 | 1 | 3.965790  | 1.784508  | -1.201673 |
| 42 | 1 | 2.873340  | 2.643737  | -2.349455 |
| 43 | 6 | 1.944196  | 0.900631  | 0.466379  |
| 44 | 6 | 0.638522  | 1.016108  | 1.238097  |
| 45 | 1 | -1.908402 | 2.804645  | -0.311806 |
| 46 | 1 | -1.268977 | 2.946959  | 1.316027  |
| 47 | 1 | 0.365202  | -1.506243 | -1.609226 |
| 48 | 1 | 2.681662  | -0.740812 | -0.739585 |
| 49 | 1 | 1.868060  | 0.337278  | -1.812946 |
| 50 | 1 | 0.394740  | 0.108876  | 1.792099  |

|    |   |          |           |           |
|----|---|----------|-----------|-----------|
| 51 | 1 | 2.881347 | 0.692698  | 0.979531  |
| 52 | 1 | 0.169637 | 2.349907  | -1.823948 |
| 53 | 1 | 0.746137 | 1.829300  | 1.966883  |
| 54 | 6 | 5.084744 | -0.920356 | 1.697659  |
| 55 | 6 | 4.681201 | -2.025567 | 0.945901  |
| 56 | 6 | 4.995215 | -2.098675 | -0.412547 |
| 57 | 6 | 5.709293 | -1.064569 | -1.020280 |
| 58 | 6 | 6.111587 | 0.040703  | -0.268762 |
| 59 | 6 | 5.801282 | 0.112152  | 1.090601  |
| 60 | 1 | 4.867985 | -0.879289 | 2.761829  |
| 61 | 1 | 4.149113 | -2.842899 | 1.425212  |
| 62 | 1 | 4.708413 | -2.973426 | -0.990141 |
| 63 | 1 | 5.976900 | -1.133955 | -2.071142 |
| 64 | 1 | 6.698364 | 0.828710  | -0.733828 |
| 65 | 1 | 6.141913 | 0.957836  | 1.682096  |

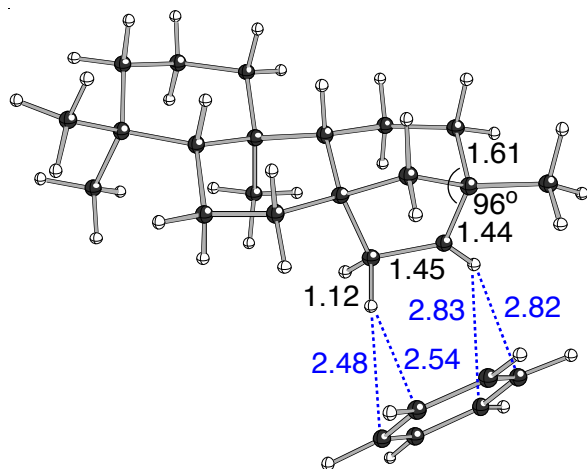

PBE1/6-31+G(d,p)//PBE1/6-31+G(d,p):

HF = -1012.8501988 hartrees (-635573.628248988 kcal/mol)

Imaginary Frequencies: none found

Zero-point correction = 0.596171 (Hartree/Particle)

Counterpoise: BSSE energy = 0.001034187456 hartrees

Coordinates (from last standard orientation):

| Center Number | Atomic Number | Coordinates (Angstroms) |           |           |
|---------------|---------------|-------------------------|-----------|-----------|
|               |               | X                       | Y         | Z         |
| 1             | 6             | 3.984028                | -1.054611 | -0.312974 |
| 2             | 6             | 2.554230                | -0.474404 | -0.536486 |

|    |   |           |           |           |
|----|---|-----------|-----------|-----------|
| 3  | 6 | 2.035583  | 0.576302  | 0.495155  |
| 4  | 6 | 3.117339  | 1.660031  | 0.690158  |
| 5  | 6 | 4.495157  | 1.088671  | 1.010977  |
| 6  | 6 | 4.952402  | 0.117574  | -0.067507 |
| 7  | 1 | 2.656371  | 0.099663  | -1.474798 |
| 8  | 1 | 3.195295  | 2.252296  | -0.234392 |
| 9  | 1 | 2.815178  | 2.354349  | 1.484365  |
| 10 | 1 | 5.213387  | 1.912156  | 1.095262  |
| 11 | 1 | 4.492613  | 0.600171  | 1.993247  |
| 12 | 1 | 5.068609  | 0.673057  | -1.010200 |
| 13 | 1 | 5.944477  | -0.283419 | 0.174911  |
| 14 | 6 | 0.787258  | 1.259507  | -0.161307 |
| 15 | 6 | 1.479969  | -1.530731 | -0.803990 |
| 16 | 1 | 1.859417  | -2.296099 | -1.487349 |
| 17 | 1 | 1.210801  | -2.060751 | 0.117589  |
| 18 | 6 | 0.252019  | -0.893398 | -1.438157 |
| 19 | 6 | -0.322691 | 0.301061  | -0.674129 |
| 20 | 6 | 4.083469  | -2.085698 | 0.820590  |
| 21 | 1 | 3.340663  | -2.882815 | 0.708437  |
| 22 | 1 | 5.070344  | -2.560467 | 0.794876  |
| 23 | 1 | 3.963943  | -1.654399 | 1.816622  |
| 24 | 6 | 4.442587  | -1.754000 | -1.603125 |
| 25 | 1 | 4.315294  | -1.107575 | -2.479472 |
| 26 | 1 | 5.506505  | -2.004642 | -1.530916 |
| 27 | 1 | 3.908052  | -2.691128 | -1.789461 |
| 28 | 6 | 1.716209  | -0.036659 | 1.869280  |
| 29 | 1 | 2.631417  | -0.297837 | 2.400170  |
| 30 | 1 | 1.189647  | 0.672701  | 2.515669  |
| 31 | 1 | 1.122687  | -0.952835 | 1.812812  |
| 32 | 6 | -1.298720 | 1.086351  | -1.573081 |
| 33 | 1 | -1.948659 | 0.394106  | -2.124773 |
| 34 | 1 | 1.178423  | 1.744059  | -1.070396 |
| 35 | 6 | 0.159291  | 2.369079  | 0.697899  |
| 36 | 1 | -0.051995 | 1.993204  | 1.706344  |
| 37 | 6 | -1.118883 | 2.950111  | 0.097987  |
| 38 | 6 | -2.135438 | 1.896658  | -0.582103 |
| 39 | 6 | -3.361802 | 2.631544  | -1.085501 |
| 40 | 1 | -4.042258 | 1.935865  | -1.583523 |
| 41 | 1 | -3.903064 | 3.126861  | -0.273663 |
| 42 | 1 | -3.068414 | 3.394509  | -1.811733 |
| 43 | 6 | -2.235743 | 1.024763  | 0.563724  |
| 44 | 6 | -1.286053 | -0.065750 | 0.498165  |
| 45 | 1 | 0.538726  | -0.529776 | -2.434814 |
| 46 | 1 | -0.541338 | -1.634525 | -1.604317 |

|    |   |           |           |           |
|----|---|-----------|-----------|-----------|
| 47 | 1 | 0.867492  | 3.191441  | 0.832949  |
| 48 | 1 | -1.662812 | 3.562689  | 0.823108  |
| 49 | 1 | -0.886568 | 3.584739  | -0.767478 |
| 50 | 1 | -0.871035 | -0.368363 | 1.462254  |
| 51 | 1 | -2.841743 | 1.257268  | 1.437978  |
| 52 | 1 | -0.786716 | 1.721118  | -2.302829 |
| 53 | 1 | -1.923507 | -0.925826 | 0.169656  |
| 54 | 6 | -3.892328 | -2.193933 | 1.577990  |
| 55 | 6 | -4.567262 | -0.976291 | 1.571631  |
| 56 | 6 | -4.887880 | -0.359952 | 0.354645  |
| 57 | 6 | -4.552361 | -0.977919 | -0.854332 |
| 58 | 6 | -3.875633 | -2.195710 | -0.847110 |
| 59 | 6 | -3.539208 | -2.799621 | 0.368739  |
| 60 | 1 | -3.654473 | -2.681140 | 2.518996  |
| 61 | 1 | -4.868391 | -0.515994 | 2.509073  |
| 62 | 1 | -5.454871 | 0.567623  | 0.350801  |
| 63 | 1 | -4.842792 | -0.523378 | -1.797495 |
| 64 | 1 | -3.627547 | -2.687469 | -1.783314 |
| 65 | 1 | -3.026393 | -3.757308 | 0.372969  |

-----  
Beyeranyl cation in the complex

PBE1/6-31+G(d,p)//PBE1/6-31+G(d,p):

HF = -780.8526838 hartrees (-489992.867611338 kcal/mol)

B971

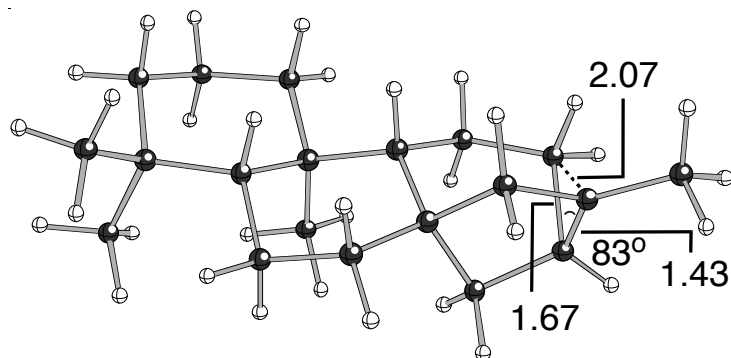

B971/6-31+G(d,p)//B971/6-31+G(d,p):

HF = -781.5565375 hartrees (-490434.542846625 kcal/mol)

Imaginary Frequencies: none found

Zero-point correction = 0.489630 (Hartree/Particle)

Coordinates (from last standard orientation):  
-----

| Center<br>Number | Atomic<br>Number | Coordinates (Angstroms) |           |           |
|------------------|------------------|-------------------------|-----------|-----------|
|                  |                  | X                       | Y         | Z         |
| 1                | 6                | 3.180195                | -0.542780 | -0.207051 |
| 2                | 6                | 1.605456                | -0.589056 | -0.206912 |
| 3                | 6                | 0.836199                | 0.733462  | 0.153979  |
| 4                | 6                | 1.442559                | 1.917265  | -0.655260 |
| 5                | 6                | 2.971148                | 2.018882  | -0.530622 |
| 6                | 6                | 3.642599                | 0.717172  | -0.987969 |
| 7                | 1                | 1.356884                | -0.771092 | -1.269165 |
| 8                | 1                | 1.194014                | 1.784480  | -1.720855 |
| 9                | 1                | 0.982880                | 2.864405  | -0.338943 |
| 10               | 1                | 3.326461                | 2.854407  | -1.147469 |
| 11               | 1                | 3.258588                | 2.263382  | 0.500836  |
| 12               | 1                | 3.419973                | 0.568260  | -2.056882 |
| 13               | 1                | 4.735194                | 0.803622  | -0.910242 |
| 14               | 6                | -0.659238               | 0.542987  | -0.338573 |
| 15               | 6                | 0.999858                | -1.766939 | 0.583466  |
| 16               | 1                | 1.567084                | -2.686921 | 0.404017  |
| 17               | 1                | 1.049982                | -1.585853 | 1.663975  |
| 18               | 6                | -0.444706               | -2.013758 | 0.131156  |
| 19               | 6                | -1.381106               | -0.778457 | 0.116418  |
| 20               | 6                | 3.835120                | -0.572396 | 1.196758  |
| 21               | 1                | 3.433115                | -1.380170 | 1.820094  |
| 22               | 1                | 4.911992                | -0.752695 | 1.088902  |
| 23               | 1                | 3.727362                | 0.365547  | 1.749537  |
| 24               | 6                | 3.705807                | -1.780463 | -0.979343 |
| 25               | 1                | 3.232990                | -1.870373 | -1.966471 |
| 26               | 1                | 4.787302                | -1.687693 | -1.138172 |
| 27               | 1                | 3.541161                | -2.716877 | -0.433171 |
| 28               | 6                | 0.921489                | 1.074446  | 1.665047  |
| 29               | 1                | 1.959984                | 1.168587  | 1.984241  |
| 30               | 1                | 0.449959                | 2.037663  | 1.891118  |
| 31               | 1                | 0.466856                | 0.316227  | 2.309766  |
| 32               | 6                | -2.561014               | -1.115376 | -0.866339 |
| 33               | 1                | -2.825900               | -2.186388 | -0.768673 |
| 34               | 1                | -0.584673               | 0.486328  | -1.436520 |
| 35               | 6                | -1.539812               | 1.777876  | 0.015199  |
| 36               | 1                | -1.312248               | 2.130411  | 1.025277  |
| 37               | 6                | -3.045743               | 1.515403  | -0.044117 |
| 38               | 6                | -3.767527               | -0.398097 | -0.360895 |
| 39               | 6                | -5.104966               | -0.424924 | -1.006478 |
| 40               | 1                | -5.543695               | -1.399939 | -0.735173 |
| 41               | 1                | -5.776093               | 0.349589  | -0.624318 |

|    |   |           |           |           |
|----|---|-----------|-----------|-----------|
| 42 | 1 | -5.048900 | -0.392186 | -2.098960 |
| 43 | 6 | -3.443904 | 0.196420  | 0.899629  |
| 44 | 6 | -2.178066 | -0.496340 | 1.427002  |
| 45 | 1 | -0.395484 | -2.398317 | -0.899094 |
| 46 | 1 | -0.916691 | -2.806836 | 0.729966  |
| 47 | 1 | -1.322117 | 2.610187  | -0.663675 |
| 48 | 1 | -3.678200 | 2.308791  | 0.367448  |
| 49 | 1 | -3.364423 | 1.435454  | -1.099285 |
| 50 | 1 | -1.641960 | 0.110386  | 2.159155  |
| 51 | 1 | -4.244459 | 0.464760  | 1.589045  |
| 52 | 1 | -2.352869 | -0.950804 | -1.931141 |
| 53 | 1 | -2.480163 | -1.428302 | 1.924249  |

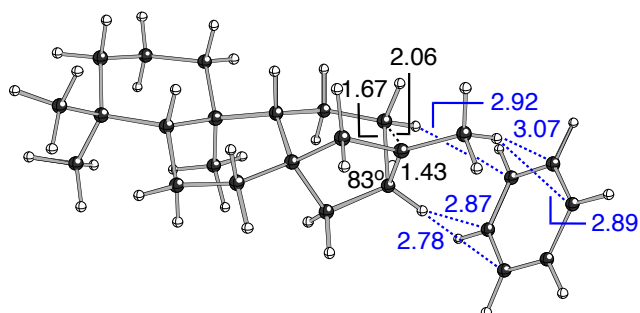

B971/6-31+G(d,p)//B971/6-31+G(d,p):

HF = -1013.7600496 hartrees (-636144.568724496 kcal/mol)

Imaginary Frequencies: none found

Zero-point correction = 0.590699 (Hartree/Particle)

Counterpoise: BSSE energy = 0.000753754177 hartrees

Coordinates (from last standard orientation):

| Center Number | Atomic Number | Coordinates (Angstroms) |           |           |
|---------------|---------------|-------------------------|-----------|-----------|
|               |               | X                       | Y         | Z         |
| 1             | 6             | -4.750019               | 0.062852  | 0.245690  |
| 2             | 6             | -3.232990               | 0.453144  | 0.071577  |
| 3             | 6             | -2.199049               | -0.712626 | -0.134431 |
| 4             | 6             | -2.738331               | -1.681884 | -1.225683 |
| 5             | 6             | -4.174730               | -2.158191 | -0.957598 |
| 6             | 6             | -5.133557               | -0.964980 | -0.853766 |
| 7             | 1             | -3.221605               | 1.003040  | -0.888148 |
| 8             | 1             | -2.724205               | -1.165243 | -2.199232 |
| 9             | 1             | -2.072269               | -2.551243 | -1.319508 |
| 10            | 1             | -4.493240               | -2.817483 | -1.775462 |

|    |   |           |           |           |
|----|---|-----------|-----------|-----------|
| 11 | 1 | -4.213349 | -2.769614 | -0.045822 |
| 12 | 1 | -5.151593 | -0.447387 | -1.826305 |
| 13 | 1 | -6.159522 | -1.314257 | -0.672337 |
| 14 | 6 | -0.868120 | -0.058811 | -0.697244 |
| 15 | 6 | -2.699115 | 1.433287  | 1.134682  |
| 16 | 1 | -3.442944 | 2.206195  | 1.357978  |
| 17 | 1 | -2.501238 | 0.918794  | 2.083227  |
| 18 | 6 | -1.438954 | 2.131619  | 0.610686  |
| 19 | 6 | -0.321400 | 1.203655  | 0.070749  |
| 20 | 6 | -5.128948 | -0.485910 | 1.644856  |
| 21 | 1 | -4.746686 | 0.150309  | 2.452286  |
| 22 | 1 | -6.221834 | -0.507969 | 1.739960  |
| 23 | 1 | -4.777745 | -1.506417 | 1.824272  |
| 24 | 6 | -5.610116 | 1.331471  | 0.009520  |
| 25 | 1 | -5.346908 | 1.826813  | -0.934543 |
| 26 | 1 | -6.670661 | 1.056108  | -0.045215 |
| 27 | 1 | -5.510326 | 2.063188  | 0.820138  |
| 28 | 6 | -1.952418 | -1.520768 | 1.166646  |
| 29 | 1 | -2.890948 | -1.897601 | 1.573750  |
| 30 | 1 | -1.326431 | -2.401416 | 0.981826  |
| 31 | 1 | -1.481554 | -0.933046 | 1.960956  |
| 32 | 6 | 0.569343  | 2.068397  | -0.892086 |
| 33 | 1 | 0.658256  | 3.095708  | -0.488911 |
| 34 | 1 | -1.137472 | 0.294160  | -1.705856 |
| 35 | 6 | 0.268608  | -1.110770 | -0.850137 |
| 36 | 1 | 0.304695  | -1.760397 | 0.029122  |
| 37 | 6 | 1.661610  | -0.506468 | -1.026096 |
| 38 | 6 | 1.956812  | 1.522413  | -0.806136 |
| 39 | 6 | 3.117483  | 2.027592  | -1.583123 |
| 40 | 1 | 3.429407  | 2.955744  | -1.075710 |
| 41 | 1 | 3.969352  | 1.341442  | -1.551963 |
| 42 | 1 | 2.854033  | 2.295202  | -2.611228 |
| 43 | 6 | 1.996936  | 0.543907  | 0.233561  |
| 44 | 6 | 0.750118  | 0.746753  | 1.107744  |
| 45 | 1 | -1.755354 | 2.784101  | -0.217512 |
| 46 | 1 | -1.006390 | 2.795620  | 1.373608  |
| 47 | 1 | 0.076104  | -1.759494 | -1.712472 |
| 48 | 1 | 2.500500  | -1.208008 | -0.963311 |
| 49 | 1 | 1.748209  | -0.065240 | -2.035016 |
| 50 | 1 | 0.481454  | -0.149645 | 1.670396  |
| 51 | 1 | 2.950270  | 0.266246  | 0.685474  |
| 52 | 1 | 0.190657  | 2.175085  | -1.916455 |
| 53 | 1 | 0.969918  | 1.540547  | 1.835122  |
| 54 | 6 | 5.354831  | -0.533860 | 1.835532  |



|    |   |          |           |           |
|----|---|----------|-----------|-----------|
| 55 | 6 | 4.940998 | -1.723790 | 1.216867  |
| 56 | 6 | 5.207968 | -1.936739 | -0.144121 |
| 57 | 6 | 5.888992 | -0.960055 | -0.886438 |
| 58 | 6 | 6.303214 | 0.228751  | -0.267129 |
| 59 | 6 | 6.035471 | 0.442350  | 1.093326  |
| 60 | 1 | 5.171402 | -0.380603 | 2.896822  |
| 61 | 1 | 4.438584 | -2.493097 | 1.799600  |
| 62 | 1 | 4.917861 | -2.873823 | -0.615402 |
| 63 | 1 | 6.124488 | -1.138993 | -1.933550 |
| 64 | 1 | 6.859991 | 0.971835  | -0.834484 |
| 65 | 1 | 6.379287 | 1.352812  | 1.579227  |

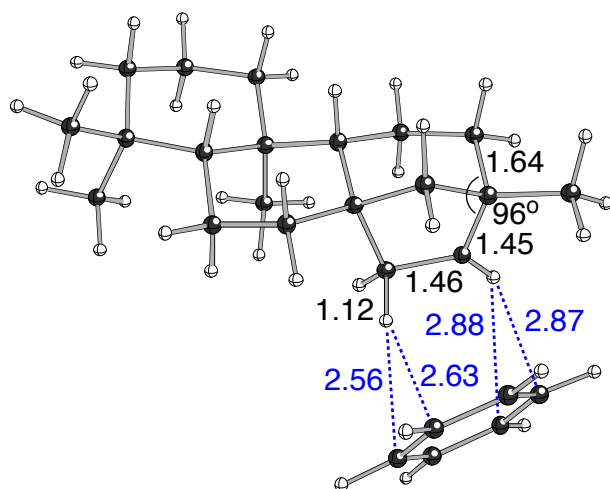

B971/6-31+G(d,p)//B971/6-31+G(d,p):

HF = -1013.7554369 hartrees (-636141.674209119 kcal/mol)

Imaginary Frequencies: none found

Zero-point correction = 0.590665 (Hartree/Particle)

Counterpoise: BSSE energy = 0.00104597225 hartrees

Coordinates (from last standard orientation):

| Center Number | Atomic Number | Coordinates (Angstroms) |           |           |
|---------------|---------------|-------------------------|-----------|-----------|
|               |               | X                       | Y         | Z         |
| 1             | 6             | 4.022782                | -1.084592 | -0.311954 |
| 2             | 6             | 2.582330                | -0.492047 | -0.536445 |
| 3             | 6             | 2.070944                | 0.580108  | 0.498884  |
| 4             | 6             | 3.169738                | 1.668191  | 0.678932  |
| 5             | 6             | 4.557755                | 1.088256  | 0.999703  |
| 6             | 6             | 5.007950                | 0.093114  | -0.077291 |

|    |   |           |           |           |
|----|---|-----------|-----------|-----------|
| 7  | 1 | 2.684286  | 0.073896  | -1.480667 |
| 8  | 1 | 3.246063  | 2.252622  | -0.252371 |
| 9  | 1 | 2.876495  | 2.371367  | 1.470926  |
| 10 | 1 | 5.280985  | 1.911518  | 1.065491  |
| 11 | 1 | 4.558691  | 0.612519  | 1.989780  |
| 12 | 1 | 5.128080  | 0.639163  | -1.026689 |
| 13 | 1 | 5.998143  | -0.313185 | 0.171371  |
| 14 | 6 | 0.810924  | 1.271357  | -0.163827 |
| 15 | 6 | 1.490244  | -1.551181 | -0.794145 |
| 16 | 1 | 1.861482  | -2.324968 | -1.474995 |
| 17 | 1 | 1.217395  | -2.071434 | 0.133546  |
| 18 | 6 | 0.255721  | -0.905287 | -1.436379 |
| 19 | 6 | -0.315054 | 0.307531  | -0.673160 |
| 20 | 6 | 4.122321  | -2.116817 | 0.837858  |
| 21 | 1 | 3.371905  | -2.910504 | 0.734841  |
| 22 | 1 | 5.107857  | -2.598281 | 0.810115  |
| 23 | 1 | 4.010384  | -1.675153 | 1.832093  |
| 24 | 6 | 4.475502  | -1.801962 | -1.610065 |
| 25 | 1 | 4.350380  | -1.158235 | -2.490865 |
| 26 | 1 | 5.539047  | -2.061735 | -1.538506 |
| 27 | 1 | 3.929329  | -2.736020 | -1.788013 |
| 28 | 6 | 1.751015  | -0.022712 | 1.892000  |
| 29 | 1 | 2.667485  | -0.296227 | 2.417511  |
| 30 | 1 | 1.239931  | 0.701995  | 2.536572  |
| 31 | 1 | 1.139480  | -0.929488 | 1.845305  |
| 32 | 6 | -1.295368 | 1.101704  | -1.582757 |
| 33 | 1 | -1.948000 | 0.411935  | -2.137118 |
| 34 | 1 | 1.201586  | 1.749283  | -1.077659 |
| 35 | 6 | 0.186903  | 2.401649  | 0.696790  |
| 36 | 1 | -0.021567 | 2.037271  | 1.711123  |
| 37 | 6 | -1.101842 | 2.989714  | 0.097824  |
| 38 | 6 | -2.137814 | 1.920076  | -0.583450 |
| 39 | 6 | -3.371677 | 2.664900  | -1.090683 |
| 40 | 1 | -4.056548 | 1.966539  | -1.583186 |
| 41 | 1 | -3.908981 | 3.165432  | -0.276951 |
| 42 | 1 | -3.075838 | 3.424148  | -1.822296 |
| 43 | 6 | -2.245295 | 1.045161  | 0.566711  |
| 44 | 6 | -1.292294 | -0.058030 | 0.508422  |
| 45 | 1 | 0.543143  | -0.551141 | -2.437902 |
| 46 | 1 | -0.543084 | -1.645259 | -1.592751 |
| 47 | 1 | 0.900649  | 3.223921  | 0.816074  |
| 48 | 1 | -1.645124 | 3.600677  | 0.826509  |
| 49 | 1 | -0.876870 | 3.619856  | -0.774092 |
| 50 | 1 | -0.876393 | -0.345283 | 1.478824  |

|    |   |           |           |           |
|----|---|-----------|-----------|-----------|
| 51 | 1 | -2.859007 | 1.276335  | 1.437574  |
| 52 | 1 | -0.779724 | 1.737677  | -2.310817 |
| 53 | 1 | -1.919992 | -0.926987 | 0.187263  |
| 54 | 6 | -3.978238 | -2.216106 | 1.575605  |
| 55 | 6 | -4.643289 | -0.984982 | 1.581119  |
| 56 | 6 | -4.960341 | -0.351661 | 0.363987  |
| 57 | 6 | -4.629563 | -0.965253 | -0.856952 |
| 58 | 6 | -3.963704 | -2.196902 | -0.861324 |
| 59 | 6 | -3.631966 | -2.818683 | 0.354654  |
| 60 | 1 | -3.744417 | -2.714687 | 2.513109  |
| 61 | 1 | -4.938405 | -0.529035 | 2.523951  |
| 62 | 1 | -5.518085 | 0.582969  | 0.368617  |
| 63 | 1 | -4.915315 | -0.497971 | -1.796819 |
| 64 | 1 | -3.721235 | -2.683171 | -1.803305 |
| 65 | 1 | -3.130320 | -3.783637 | 0.350052  |

Beyeranyl cation in the complex

B971/6-31+G(d,p)//B971/6-31+G(d,p):

HF = -781.5460492 hartrees (-490427.961333492 kcal/mol)

### Table S2

2-Norbornyl cation and benzene complex (**2**)

B3LYP/6-31+G(d,p)//B3LYP/6-31+G(d,p):

2-Norbornyl cation-benzene complex

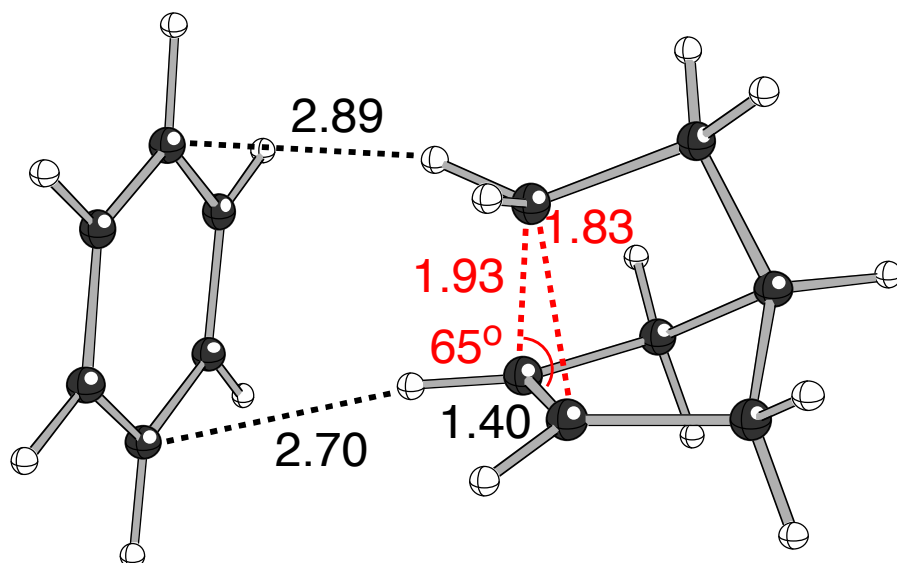

HF = -505.3626532 hartrees (-317120.118509532 kcal/mol)

Imaginary Frequencies: none found

Zero-point correction = 0.264982 (Hartree/Particle)  
Counterpoise: BSSE energy = 0.000656336 hartrees

2-Norbornyl cation in the complex  
HF = -273.0834936 hartrees (-171362.623068936 kcal/mol)

Coordinates (from last standard orientation):

```
-----  
Center   Atomic      Coordinates (Angstroms)  
Number   Number          X       Y       Z  
-----  
  1      6      -1.786691 -0.869793  1.155436  
  2      6      -3.058140 -0.140428  0.654958  
  3      6      -1.700522 -0.504236 -1.184081  
  4      6      -0.903928 -0.687657 -0.051081  
  5      1      -1.357576 -0.479243  2.080918  
  6      1      -1.958586 -1.948159  1.284920  
  7      1       0.177663 -0.797242 -0.066207  
  8      6      -3.161226 -0.656490 -0.798573  
  9      1      -3.844273 -0.087164 -1.432910  
 10      6      -2.588891  1.320677  0.467588  
 11      1      -3.354000  1.933446 -0.015020  
 12      1      -2.312439  1.792623  1.413249  
 13      6      -1.372458  1.137799 -0.440173  
 14      1      -1.389051  1.601874 -1.429187  
 15      1      -0.389517  1.368888 -0.017226  
 16      1      -3.946729 -0.273627  1.270996  
 17      1      -1.316114 -0.537061 -2.198250  
 18      1      -3.437937 -1.716846 -0.852596  
 19      6       2.450825  1.343506  0.496686  
 20      6       2.540479  0.279874  1.403336  
 21      6       2.537362  1.099669 -0.879941  
 22      6       2.719512 -1.027076  0.933593  
 23      1       2.503056  0.472390  2.471765  
 24      6       2.712963 -0.207737 -1.349694  
 25      1       2.502708  1.928362 -1.581883  
 26      6       2.805887 -1.270894 -0.442727  
 27      1       2.818304 -1.848377  1.637573  
 28      1       2.809768 -0.393762 -2.415575  
 29      1       2.971703 -2.281155 -0.805743  
 30      1       2.351990  2.361766  0.863213  
-----
```

CAM-B3LYP/6-31+G(d,p)//CAM-B3LYP/6-31+G(d,p):

### 2-Norbornyl cation-benzene complex

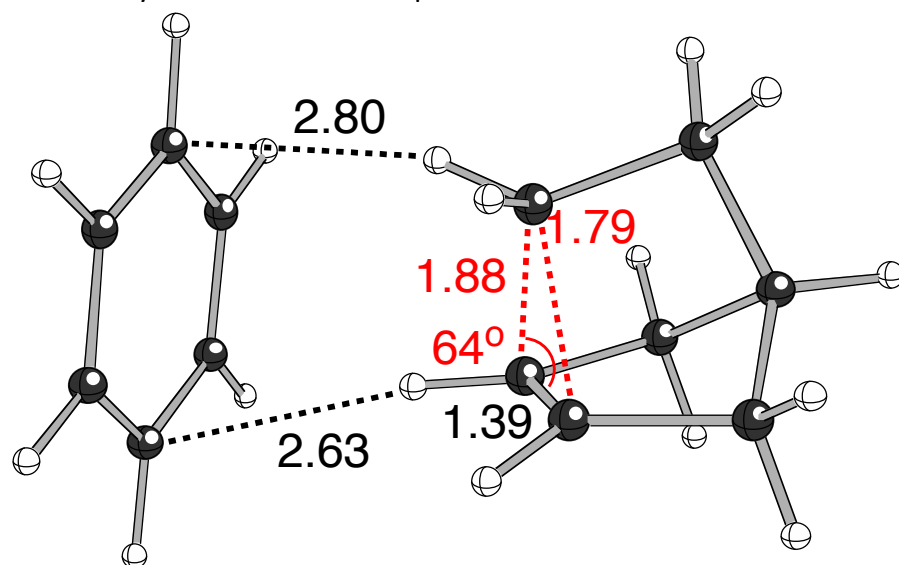

HF = -505.0503319 hartrees (-316924.133770569 kcal/mol)

Imaginary Frequencies: none found

Zero-point correction = 0.268339 (Hartree/Particle)

Counterpoise: BSSE energy = 0.000682181 hartrees

### 2-Norbornyl cation in the complex

HF = -272.9138056 hartrees (-171256.142152056 kcal/mol)

Coordinates (from last standard orientation):

| Center Number | Atomic Number | Coordinates (Angstroms) |           |           |
|---------------|---------------|-------------------------|-----------|-----------|
|               |               | X                       | Y         | Z         |
| 1             | 6             | 1.666008                | -0.990539 | -1.018614 |
| 2             | 6             | 2.978952                | -0.266296 | -0.662660 |
| 3             | 6             | 1.693811                | -0.327451 | 1.248217  |
| 4             | 6             | 0.844754                | -0.616857 | 0.183004  |
| 5             | 1             | 1.215373                | -0.695962 | -1.967903 |
| 6             | 1             | 1.783591                | -2.082049 | -1.015409 |
| 7             | 1             | -0.236981               | -0.687206 | 0.255060  |
| 8             | 6             | 3.124446                | -0.601438 | 0.831334  |
| 9             | 1             | 3.857849                | 0.010740  | 1.358865  |
| 10            | 6             | 2.573136                | 1.216660  | -0.633942 |
| 11            | 1             | 3.374912                | 1.850910  | -0.251719 |
| 12            | 1             | 2.275903                | 1.588269  | -1.616065 |
| 13            | 6             | 1.390457                | 1.176481  | 0.329733  |
| 14            | 1             | 1.440728                | 1.781116  | 1.237160  |
| 15            | 1             | 0.404284                | 1.387932  | -0.096337 |

|    |   |           |           |           |
|----|---|-----------|-----------|-----------|
| 16 | 1 | 3.833705  | -0.510170 | -1.291018 |
| 17 | 1 | 1.353088  | -0.226209 | 2.272666  |
| 18 | 1 | 3.355308  | -1.657251 | 1.010850  |
| 19 | 6 | -2.354689 | 1.305365  | -0.580341 |
| 20 | 6 | -2.448448 | 0.193631  | -1.417407 |
| 21 | 6 | -2.478515 | 1.151310  | 0.800725  |
| 22 | 6 | -2.669839 | -1.071521 | -0.874029 |
| 23 | 1 | -2.380761 | 0.317416  | -2.493749 |
| 24 | 6 | -2.696984 | -0.114456 | 1.344093  |
| 25 | 1 | -2.438998 | 2.020651  | 1.450109  |
| 26 | 6 | -2.794939 | -1.225477 | 0.506262  |
| 27 | 1 | -2.770093 | -1.932680 | -1.527065 |
| 28 | 1 | -2.821602 | -0.231124 | 2.416084  |
| 29 | 1 | -2.992302 | -2.206322 | 0.927099  |
| 30 | 1 | -2.222900 | 2.295470  | -1.006877 |

LC- $\omega$ PBE

2-Norbornyl cation-benzene complex

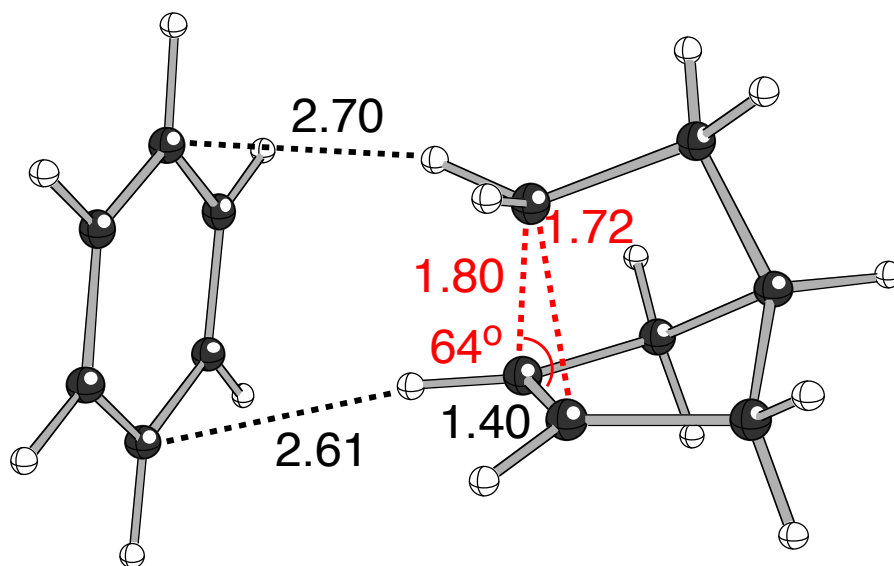

LC- $\omega$ PBE/6-31+G(d,p)//LC- $\omega$ PBE/6-31+G(d,p):

HF = -505.0124865 hartrees (-316900.385403615 kcal/mol)

Zero-point correction = 0.270906 (Hartree/Particle)

Counterpoise: BSSE energy = 0.000631162 hartrees

2-Norbornyl cation in the complex

LC- $\omega$ PBE/6-31+G(d,p)//LC- $\omega$ PBE/6-31+G(d,p):

HF = -272.9124511 hartrees (-171255.292189761 kcal/mol)

Coordinates (from last standard orientation):

---

| Center<br>Number | Atomic<br>Number | Coordinates (Angstroms) |           |           |
|------------------|------------------|-------------------------|-----------|-----------|
|                  |                  | X                       | Y         | Z         |
| 1                | 6                | 1.597978                | -1.252493 | -0.623545 |
| 2                | 6                | 2.917731                | -0.470840 | -0.580276 |
| 3                | 6                | 1.737401                | 0.112831  | 1.296814  |
| 4                | 6                | 0.833412                | -0.490642 | 0.421057  |
| 5                | 1                | 1.104795                | -1.272560 | -1.596932 |
| 6                | 1                | 1.712641                | -2.283254 | -0.267700 |
| 7                | 1                | -0.241805               | -0.544563 | 0.578591  |
| 8                | 6                | 3.139960                | -0.313647 | 0.926568  |
| 9                | 1                | 3.902262                | 0.421538  | 1.190076  |
| 10               | 6                | 2.498290                | 0.942869  | -0.991189 |
| 11               | 1                | 3.301705                | 1.668093  | -0.850975 |
| 12               | 1                | 2.154867                | 1.000187  | -2.025462 |
| 13               | 6                | 1.359527                | 1.174455  | -0.005962 |
| 14               | 1                | 1.377562                | 2.065572  | 0.625754  |
| 15               | 1                | 0.354209                | 1.216777  | -0.450557 |
| 16               | 1                | 3.741781                | -0.906608 | -1.142860 |
| 17               | 1                | 1.448966                | 0.528750  | 2.256574  |
| 18               | 1                | 3.372279                | -1.258941 | 1.427657  |
| 19               | 6                | -2.275305               | 0.979961  | -1.036663 |
| 20               | 6                | -2.380681               | -0.363939 | -1.383393 |
| 21               | 6                | -2.428650               | 1.370390  | 0.291004  |
| 22               | 6                | -2.645832               | -1.316272 | -0.403973 |
| 23               | 1                | -2.289561               | -0.665560 | -2.422943 |
| 24               | 6                | -2.689391               | 0.417081  | 1.270890  |
| 25               | 1                | -2.380142               | 2.422746  | 0.557420  |
| 26               | 6                | -2.801436               | -0.925917 | 0.922498  |
| 27               | 1                | -2.756433               | -2.361243 | -0.678454 |
| 28               | 1                | -2.836978               | 0.724287  | 2.302192  |
| 29               | 1                | -3.032818               | -1.666202 | 1.682740  |
| 30               | 1                | -2.111351               | 1.727963  | -1.808091 |

---

ωB97X-D

2-Norbornyl cation-benzene complex

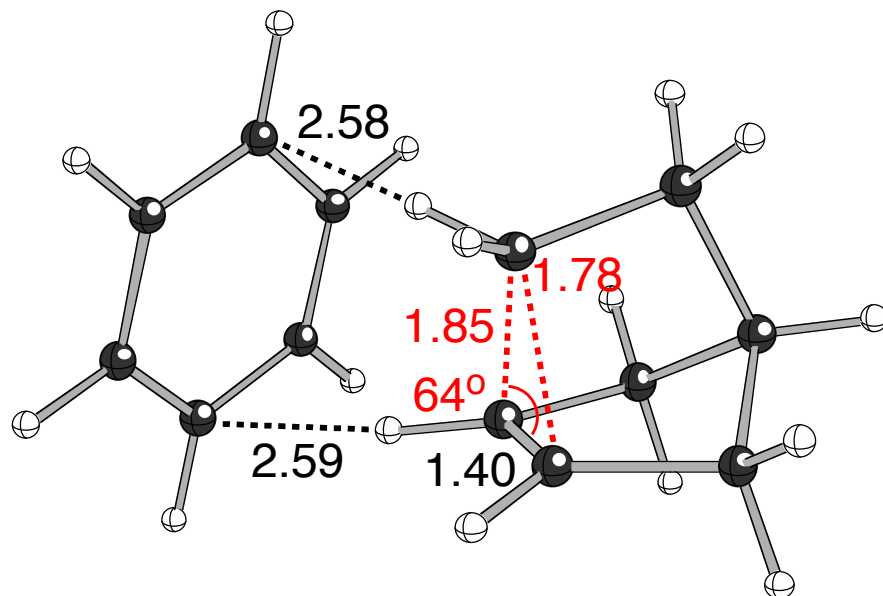

$\omega$ B97X-D/6-31+G(d,p)// $\omega$ B97X-D/6-31+G(d,p):  
HF = -505.2052168 hartrees (-317021.325594168 kcal/mol)  
Zero-point correction = 0.268431 (Hartree/Particle)  
Counterpoise: BSSE energy = 0.000702605 hartrees

2-Norbornyl cation in the complex

$\omega$ B97X-D/6-31+G(d,p)// $\omega$ B97X-D/6-31+G(d,p):  
HF = -273.0044637 hartrees (-171313.031016387 kcal/mol)

Coordinates (from last standard orientation):

---

| Center Number | Atomic Number | Coordinates (Angstroms) |           |           |
|---------------|---------------|-------------------------|-----------|-----------|
|               |               | X                       | Y         | Z         |
| 1             | 6             | -1.344875               | -1.223455 | 0.521708  |
| 2             | 6             | -2.696792               | -0.505967 | 0.704127  |
| 3             | 6             | -1.881053               | 0.100274  | -1.363773 |
| 4             | 6             | -0.813034               | -0.440165 | -0.646855 |
| 5             | 1             | -0.684099               | -1.200483 | 1.389592  |
| 6             | 1             | -1.467794               | -2.265485 | 0.200303  |
| 7             | 1             | 0.225140                | -0.425202 | -0.968106 |
| 8             | 6             | -3.182203               | -0.374245 | -0.750585 |
| 9             | 1             | -4.008305               | 0.325822  | -0.886612 |
| 10            | 6             | -2.287062               | 0.935591  | 1.050794  |
| 11            | 1             | -3.141721               | 1.614349  | 1.062603  |
| 12            | 1             | -1.772048               | 1.004559  | 2.010595  |
| 13            | 6             | -1.344021               | 1.248095  | -0.108401 |
| 14            | 1             | -1.568744               | 2.104833  | -0.747809 |

---



|    |   |           |           |           |
|----|---|-----------|-----------|-----------|
| 15 | 1 | -0.283570 | 1.362681  | 0.152109  |
| 16 | 1 | -3.390864 | -0.979842 | 1.395272  |
| 17 | 1 | -1.780135 | 0.533983  | -2.352347 |
| 18 | 1 | -3.456175 | -1.336502 | -1.196982 |
| 19 | 6 | 2.124563  | 1.014446  | 1.009362  |
| 20 | 6 | 2.146806  | -0.324785 | 1.403249  |
| 21 | 6 | 2.414060  | 1.358199  | -0.313086 |
| 22 | 6 | 2.464361  | -1.319433 | 0.477595  |
| 23 | 1 | 1.951172  | -0.587819 | 2.438550  |
| 24 | 6 | 2.728407  | 0.362603  | -1.240016 |
| 25 | 1 | 2.427050  | 2.401973  | -0.612676 |
| 26 | 6 | 2.757019  | -0.976034 | -0.843333 |
| 27 | 1 | 2.509640  | -2.358126 | 0.789992  |
| 28 | 1 | 2.977941  | 0.630488  | -2.261889 |
| 29 | 1 | 3.028183  | -1.747110 | -1.557416 |
| 30 | 1 | 1.917268  | 1.791128  | 1.740105  |

-----  
PBE1

2-Norbornyl cation-bezene complex

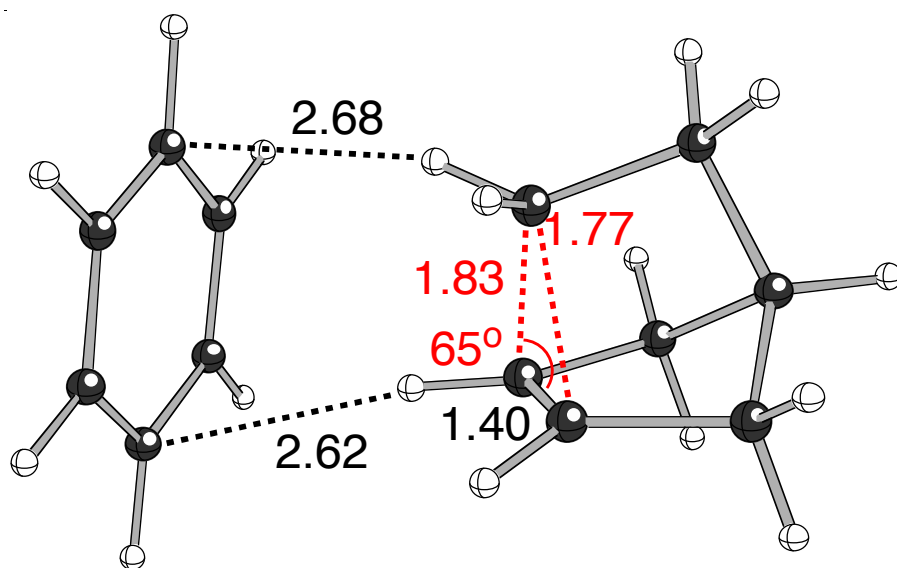

PBE1/6-31+G(d,p)//PBE1/6-31+G(d,p):

HF = -504.7538434 hartrees (-316738.084271934 kcal/mol)

Zero-point correction = 0.267165 (Hartree/Particle)

Counterpoise: BSSE energy = 0.000717505 hartrees

2-Norbornyl cation in the complex

PBE1/6-31+G(d,p)//PBE1/6-31+G(d,p):

HF = -272.7586776 hartrees (-171158.797780776 kcal/mol)

Coordinates (from last standard orientation):

| Center<br>Number | Atomic<br>Number | Coordinates (Angstroms) |           |           |
|------------------|------------------|-------------------------|-----------|-----------|
|                  |                  | X                       | Y         | Z         |
| 1                | 6                | -1.714401               | -0.909218 | 1.104427  |
| 2                | 6                | -2.980808               | -0.149781 | 0.671305  |
| 3                | 6                | -1.695740               | -0.450035 | -1.213342 |
| 4                | 6                | -0.864319               | -0.678091 | -0.112099 |
| 5                | 1                | -1.258495               | -0.558079 | 2.033129  |
| 6                | 1                | -1.889451               | -1.990773 | 1.190036  |
| 7                | 1                | 0.213022                | -0.823617 | -0.169627 |
| 8                | 6                | -3.136703               | -0.606915 | -0.786698 |
| 9                | 1                | -3.836180               | -0.007057 | -1.373517 |
| 10               | 6                | -2.484576               | 1.293741  | 0.510609  |
| 11               | 1                | -3.237178               | 1.937551  | 0.048917  |
| 12               | 1                | -2.177872               | 1.742366  | 1.458461  |
| 13               | 6                | -1.295303               | 1.076602  | -0.415827 |
| 14               | 1                | -1.268048               | 1.605832  | -1.373527 |
| 15               | 1                | -0.297628               | 1.263760  | 0.009856  |
| 16               | 1                | -3.853026               | -0.285615 | 1.310060  |
| 17               | 1                | -1.344113               | -0.461389 | -2.240337 |
| 18               | 1                | -3.420494               | -1.663195 | -0.873942 |
| 19               | 6                | 2.330006                | 1.325147  | 0.537669  |
| 20               | 6                | 2.430967                | 0.239884  | 1.411030  |
| 21               | 6                | 2.449657                | 1.126598  | -0.840121 |
| 22               | 6                | 2.656875                | -1.042786 | 0.907365  |
| 23               | 1                | 2.367892                | 0.398600  | 2.484106  |
| 24               | 6                | 2.670315                | -0.157004 | -1.343830 |
| 25               | 1                | 2.406654                | 1.975421  | -1.517685 |
| 26               | 6                | 2.777286                | -1.241156 | -0.469626 |
| 27               | 1                | 2.765223                | -1.882315 | 1.588397  |
| 28               | 1                | 2.792517                | -0.307843 | -2.412912 |
| 29               | 1                | 2.979056                | -2.234971 | -0.859518 |
| 30               | 1                | 2.198584                | 2.329412  | 0.932927  |

B971

2-Norbornyl cation-benzene complex

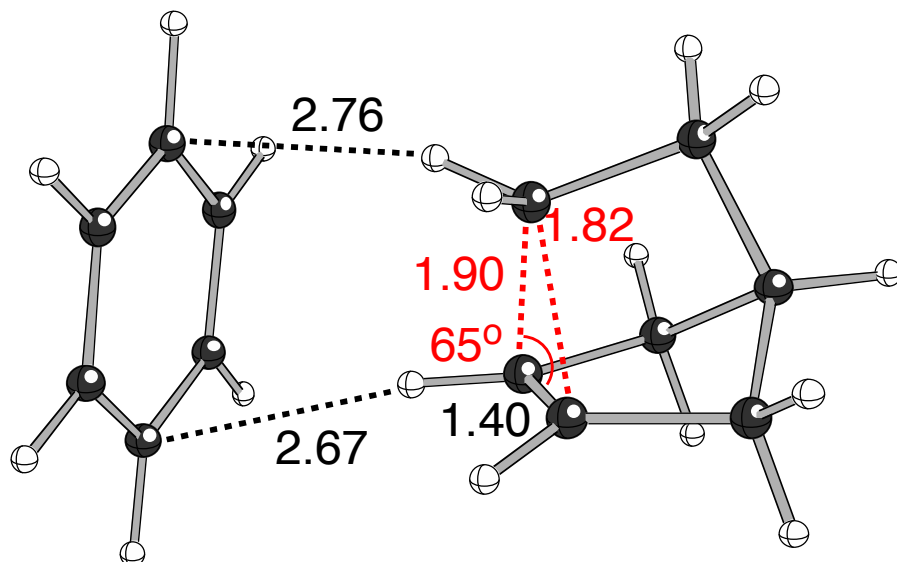

B971/6-31+G(d,p)//B971/6-31+G(d,p):  
HF = -505.209325 hartrees (-317023.90353075 kcal/mol)  
Imaginary Frequencies: none found  
Zero-point correction = 0.264591 (Hartree/Particle)  
Counterpoise: BSSE energy = 0.000682149 hartrees

2-Norbornyl cation in the complex  
B971/6-31+G(d,p)//B971/6-31+G(d,p):  
HF = -273.0024873 hartrees (-171311.790805623 kcal/mol)

Coordinates (from last standard orientation):

| -----  |        |                         |           |           |
|--------|--------|-------------------------|-----------|-----------|
| Center | Atomic | Coordinates (Angstroms) |           |           |
| Number | Number | X                       | Y         | Z         |
| -----  |        |                         |           |           |
| 1      | 6      | -1.730349               | -0.881900 | 1.140261  |
| 2      | 6      | -3.005085               | -0.120337 | 0.689868  |
| 3      | 6      | -1.730200               | -0.511191 | -1.206692 |
| 4      | 6      | -0.889509               | -0.711793 | -0.103140 |
| 5      | 1      | -1.255258               | -0.499758 | 2.048685  |
| 6      | 1      | -1.919973               | -1.958271 | 1.272830  |
| 7      | 1      | 0.189165                | -0.852080 | -0.163470 |
| 8      | 6      | -3.180100               | -0.631809 | -0.761712 |
| 9      | 1      | -3.875355               | -0.042936 | -1.367091 |
| 10     | 6      | -2.503255               | 1.328821  | 0.479434  |
| 11     | 1      | -3.265903               | 1.960869  | 0.014366  |
| 12     | 1      | -2.180434               | 1.799303  | 1.413000  |
| 13     | 6      | -1.319665               | 1.098076  | -0.467205 |

|    |   |           |           |           |
|----|---|-----------|-----------|-----------|
| 14 | 1 | -1.338757 | 1.573931  | -1.453538 |
| 15 | 1 | -0.314611 | 1.297720  | -0.069568 |
| 16 | 1 | -3.872870 | -0.231432 | 1.341714  |
| 17 | 1 | -1.386991 | -0.552820 | -2.237212 |
| 18 | 1 | -3.481322 | -1.687659 | -0.806372 |
| 19 | 6 | 2.371878  | 1.322101  | 0.565736  |
| 20 | 6 | 2.475966  | 0.214050  | 1.421296  |
| 21 | 6 | 2.481709  | 1.149268  | -0.823246 |
| 22 | 6 | 2.694238  | -1.065755 | 0.888439  |
| 23 | 1 | 2.421069  | 0.352179  | 2.498934  |
| 24 | 6 | 2.694555  | -0.131532 | -1.356381 |
| 25 | 1 | 2.436095  | 2.012315  | -1.484504 |
| 26 | 6 | 2.803984  | -1.238569 | -0.500158 |
| 27 | 1 | 2.806094  | -1.919607 | 1.552921  |
| 28 | 1 | 2.808741  | -0.261735 | -2.430341 |
| 29 | 1 | 2.999986  | -2.226381 | -0.911239 |
| 30 | 1 | 2.245317  | 2.319789  | 0.981888  |

-----  
MO6-2X

2-Norbornyl cation-bezene complex

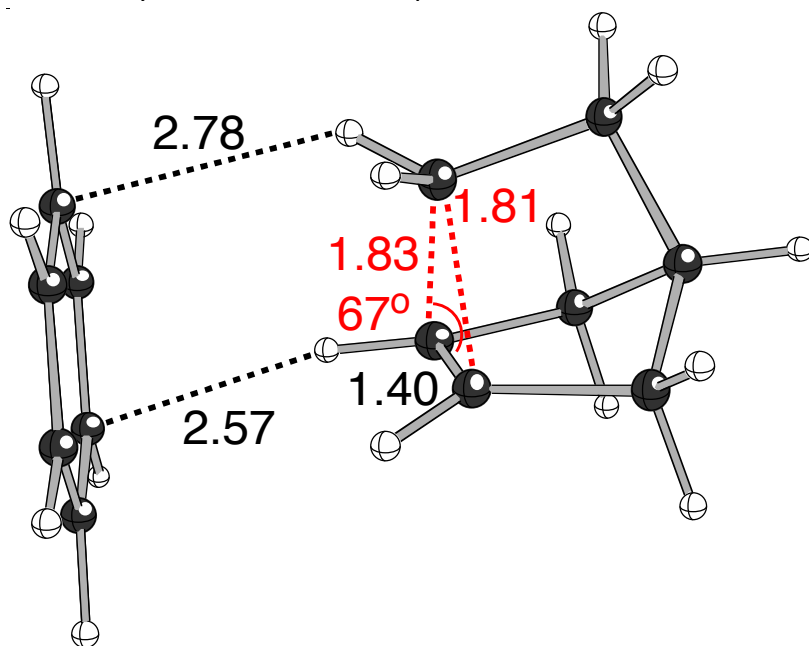

MO6-2X/6-31+G(d,p)//MO6-2X /6-31+G(d,p):

HF = -505.1163485 hartrees (-316965.559847235 kcal/mol)

Zero-point correction = 0.268169 (Hartree/Particle)

Counterpoise: BSSE energy = 0.000733063 hartrees

2-Norbornyl cation in the complex

MO6-2X/6-31+G(d,p)//MO6-2X/6-31+G(d,p):

HF = -272.945638 hartrees (-171276.11730138 kcal/mol)

Coordinates (from last standard orientation):

---

| Center<br>Number | Atomic<br>Number | Coordinates (Angstroms) |           |           |
|------------------|------------------|-------------------------|-----------|-----------|
|                  |                  | X                       | Y         | Z         |
| 1                | 6                | -1.925222               | -0.417168 | 1.451099  |
| 2                | 6                | -3.069784               | -0.110555 | 0.466383  |
| 3                | 6                | -1.240429               | -0.754788 | -0.789876 |
| 4                | 6                | -0.769557               | -0.412774 | 0.477576  |
| 5                | 1                | -1.816112               | 0.306353  | 2.261464  |
| 6                | 1                | -2.004224               | -1.423103 | 1.881748  |
| 7                | 1                | 0.284414                | -0.351333 | 0.737810  |
| 8                | 6                | -2.725659               | -1.034649 | -0.715582 |
| 9                | 1                | -3.261935               | -0.805237 | -1.638368 |
| 10               | 6                | -2.697450               | 1.279539  | -0.075355 |
| 11               | 1                | -3.329784               | 1.577985  | -0.913536 |
| 12               | 1                | -2.744518               | 2.052323  | 0.694172  |
| 13               | 6                | -1.259440               | 1.031910  | -0.525124 |
| 14               | 1                | -1.014519               | 1.177273  | -1.581286 |
| 15               | 1                | -0.466636               | 1.565857  | 0.010244  |
| 16               | 1                | -4.076606               | -0.209983 | 0.868087  |
| 17               | 1                | -0.586592               | -1.008799 | -1.617789 |
| 18               | 1                | -2.867510               | -2.095226 | -0.475569 |
| 19               | 6                | 2.312403                | 1.425260  | 0.050640  |
| 20               | 6                | 2.644249                | 0.679838  | 1.184341  |
| 21               | 6                | 2.139979                | 0.785564  | -1.179829 |
| 22               | 6                | 2.805793                | -0.704668 | 1.087156  |
| 23               | 1                | 2.802272                | 1.178899  | 2.135369  |
| 24               | 6                | 2.298754                | -0.598709 | -1.275544 |
| 25               | 1                | 1.921475                | 1.370178  | -2.069667 |
| 26               | 6                | 2.631351                | -1.344153 | -0.141772 |
| 27               | 1                | 3.086119                | -1.280708 | 1.963381  |
| 28               | 1                | 2.201482                | -1.091622 | -2.238997 |
| 29               | 1                | 2.779229                | -2.416727 | -0.220978 |
| 30               | 1                | 2.223512                | 2.505992  | 0.119225  |

---

NBO analysis (B3LYP/6-31+G(d,p)//B3LYP/6-31+G(d,p)) using NBO method implemented in Gaussian09.

1) Natural atomic charge

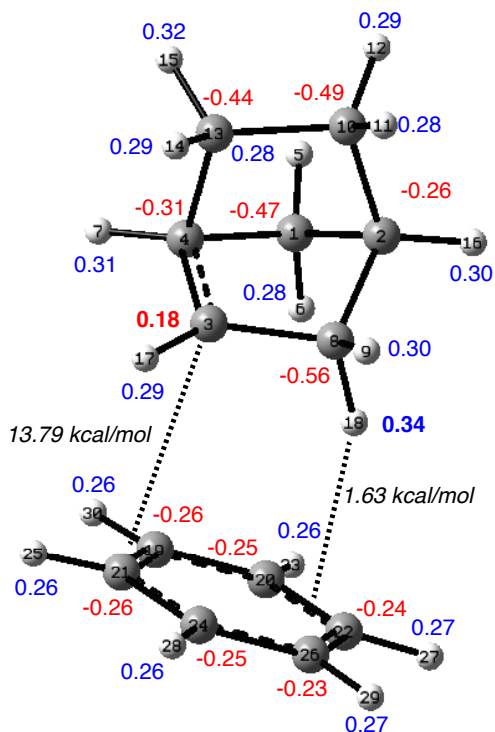

Figure S2. Computed natural charge (carbon in red and hydrogen in blue) and selected intermolecular interaction energies (See Table S4 for details).

2) Second Order Perturbation Theory Analysis of fock Matrix in NBO Basis

The strongest interaction between benzene and 2-norbornyl cation involves the interaction of C19-C21 bond with a vacant p orbital of C3, which is predicted to be 13.79 kcal/mol (Table S4; box). The second largest interaction energy is the interaction between C20-C22 bond and C8-H18 antibond, which is predicted to be 1.63 kcal/mol (Table S4; box).

Table S4. Second Order Perturbation Theory Analysis of fock Matrix in NBO Basis. E(2): Estimated strength of the donor-acceptor interactions. E(j)-E(i): The energy splitting (in atomic units) of the donor and acceptor orbitals. F(I,j): The element of the Fock (or Kohn-Sham) matrix describing the donor-acceptor interaction. Atom number is shown in Figure S2.

| Donor NBO (i)            | Acceptor NBO (j)         | E(2)<br>kcal/mol | E(j)-E(i)<br>a.u. | F(i,j)<br>a.u. |
|--------------------------|--------------------------|------------------|-------------------|----------------|
| 21. BD ( 1) C 19 - C 21  | / 48. LP*( 1) C 3        | 0.18             | 0.52              | 0.010          |
| 21. BD ( 1) C 19 - C 21  | / 78. RY*( 2) C 3        | 0.23             | 1.41              | 0.016          |
| 21. BD ( 1) C 19 - C 21  | / 80. RY*( 4) C 3        | 0.09             | 2.07              | 0.012          |
| 22. BD ( 2) C 19 - C 21  | / 48. LP*( 1) C 3        | 13.79            | 0.08              | 0.030          |
| 22. BD ( 2) C 19 - C 21  | / 85. RY*( 9) C 3        | 0.06             | 1.35              | 0.009          |
| 22. BD ( 2) C 19 - C 21  | /310. BD*( 1) C 4 - C 13 | 0.06             | 0.43              | 0.005          |
| 24. BD ( 1) C 20 - C 22  | /187. RY*( 1) H 18       | 0.15             | 1.61              | 0.014          |
| 25. BD ( 2) C 20 - C 22  | /187. RY*( 1) H 18       | 0.05             | 1.16              | 0.008          |
| 25. BD ( 2) C 20 - C 22  | /302. BD*( 1) C 1 - H 6  | 0.10             | 0.69              | 0.008          |
| 25. BD ( 2) C 20 - C 22  | /312. BD*( 1) C 8 - H 18 | 1.63             | 0.64              | 0.032          |
| 27. BD ( 1) C 21 - C 24  | / 48. LP*( 1) C 3        | 0.06             | 0.52              | 0.006          |
| 27. BD ( 1) C 21 - C 24  | / 79. RY*( 3) C 3        | 0.14             | 1.57              | 0.013          |
| 28. BD ( 1) C 21 - H 25  | / 48. LP*( 1) C 3        | 0.11             | 0.35              | 0.006          |
| 28. BD ( 1) C 21 - H 25  | /308. BD*( 1) C 3 - H 17 | 0.07             | 0.97              | 0.008          |
| 29. BD ( 1) C 22 - C 26  | /187. RY*( 1) H 18       | 0.16             | 1.61              | 0.014          |
| 32. BD ( 2) C 24 - C 26  | /303. BD*( 1) C 2 - C 8  | 0.10             | 0.56              | 0.007          |
| 32. BD ( 2) C 24 - C 26  | /312. BD*( 1) C 8 - H 18 | 0.23             | 0.64              | 0.012          |
| 320. BD*( 2) C 19 - C 21 | /308. BD*( 1) C 3 - H 17 | 0.08             | 0.43              | 0.012          |
| 320. BD*( 2) C 19 - C 21 | /310. BD*( 1) C 4 - C 13 | 0.06             | 0.16              | 0.006          |
| 323. BD*( 2) C 20 - C 22 | /302. BD*( 1) C 1 - H 6  | 0.09             | 0.41              | 0.013          |
| 323. BD*( 2) C 20 - C 22 | /312. BD*( 1) C 8 - H 18 | 0.11             | 0.36              | 0.013          |
| 330. BD*( 2) C 24 - C 26 | /312. BD*( 1) C 8 - H 18 | 0.05             | 0.36              | 0.010          |
